# Supplementary material for: Cu catalyzed [4 + 2] cycloaddition for the synthesis of highly substituted 3-fluoropyridines
Source: Royal Society of Chemistry journal article supplement (doi:10.1039/d2ob00133k), 2022-01-01

*Supporting Information*

**Cu Catalyzed [4+2] Cycloaddition for the Synthesis of  
Highly Substituted 3-Fluoropyridines**

Yiwei Fu,<sup>a</sup> Haoyu Shi,<sup>a</sup> Shengshu Lei,<sup>a</sup> Lei Shi,<sup>b</sup> and Hao Li<sup>\*a</sup>

*[a]State Key Laboratory of Bioreactor Engineering, Shanghai Key Laboratory of New Drug Design, and School of Pharmacy, East China University of Science and Technology, 130 Mei-long Road, Shanghai, 200237, China*

*[b]Huabao Flavours & Fragrances Co., Ltd., 1299 Yecheng Road, Shanghai 201822, China..*

**Table of contents**

|                                                                                                   |           |
|---------------------------------------------------------------------------------------------------|-----------|
| <b>I. General Information .....</b>                                                               | <b>2</b>  |
| <b>II. General Procedure for the preparation of Substrates .....</b>                              | <b>3</b>  |
| <b>III. Optimization of reaction conditions.....</b>                                              | <b>8</b>  |
| <b>IV. General Procedure for the synthesis of Products 3 and their Characterization Data.....</b> | <b>11</b> |
| <b>V. Determination of X-ray crystallographic structure 3r .....</b>                              | <b>25</b> |
| <b>VI. Reference .....</b>                                                                        | <b>36</b> |
| <b>VII. <sup>1</sup>H, <sup>13</sup>C and <sup>19</sup>F NMR spectra.....</b>                     | <b>37</b> |

## 1. General Information

Unless otherwise noted, all reagents were obtained commercially and used without further purification. Unless otherwise specified, all other reagents were purchased from Acros, Aldrich, Fisher, Adamas-beta Co. Ltd. or TCI and used without further purification.  $^1\text{H}$  NMR spectra was recorded at 400 MHz,  $^{13}\text{C}$  NMR spectra was recorded at 100 MHz.  $^{19}\text{F}$  NMR spectra was recorded at 375 MHz.  $^1\text{H}$  NMR spectra was recorded with tetramethylsilane ( $\delta$  0.00 ppm) as internal reference;  $^{13}\text{C}$  NMR spectra was recorded with  $\text{CDCl}_3$  ( $\delta$  77.00 ppm) as internal reference. Chemical shifts were reported in parts per million (ppm,  $\delta$ ) downfield from tetramethylsilane. Proton coupling patterns are described as singlet (s), doublet (d), triplet (t), quartet (q), multiplet (m), and broad (br). Chromatography was carried out with silica gel (200-300 mesh) using mixtures of petroleum ether (b.p. 60-80 °C) and EtOAc as eluents. Mass spectrometry analysis was carried out using an electrospray spectrometer Waters Micromass Q-TOF premier Mass Spectrometer (Waters, Milford, MA, USA).

## 2. General procedure for the preparation of substrates

### 2.1 Synthesis of Phenyl Trifluoromethyl Ketamine Derivatives.

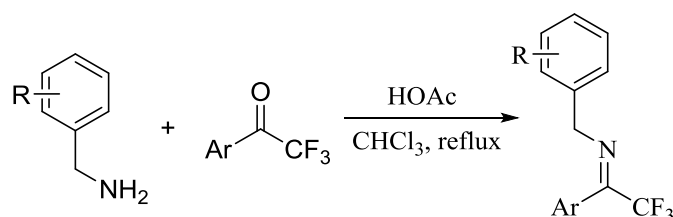

**Figure S1.** The synthesis of benzyl trifluoromethyl ketamine derivatives.

Benzyl trifluoromethyl ketamine derivatives were synthesized according to the method reported in the literature<sup>1</sup>. To the mixture of benzyl amine (1.0 equiv) and acetic acid (1.0 equiv) in  $\text{CHCl}_3$  (1.0 mL/mmol) was added the solution of trifluoromethyl ketone (1.0 equiv) in  $\text{CHCl}_3$  (0.2 mL/mmol) in one portion. The resulting mixture was refluxed until all the ketone was consumed (indicated by TLC or by the disappearance of the insoluble solid). After cooling down to room temperature,  $\text{CH}_2\text{Cl}_2$  (4.0 mL/mmol) was added and the mixture was washed with  $\text{NaHCO}_3$  (sat., 2.0 mL/mmol). The aqueous layer was extracted with  $\text{CH}_2\text{Cl}_2$  (10 mL $\times$ 2). The organic phase was combined, washed with brine, dried over  $\text{Na}_2\text{SO}_4$  and concentrated. then it could be used directly.<sup>[1]</sup>

### 2.2 Synthesis of alkenes.

#### General procedure A (2a as an example)

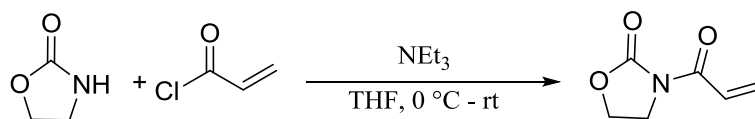

**Figure S2.** The synthesis of 3-acryloyloxazolidin-2-one.

The dienophile was synthesized according to the following procedure. To a solution of oxazolidin-2-one (1 g, 11.5 mmol) in anhydrous THF (20 mL) at 0 °C under argon atmosphere and magnetic stirring, triethylamine (4 mL, 28.8 mmol) was added. After 0.5 h, acryloyl chloride (1.9 mL, 23 mmol) was added dropwise and the mixture was stirred at 0 °C for another 2 h and then up to room temperature. The reaction was quenched by  $\text{NH}_4\text{Cl}$  aqueous solution (10 mL) after 15 h, and the resulting mixture

was diluted with dichloromethane and washed successively with saturated solutions of NaHCO<sub>3</sub> and NaCl. Concentrated HCl was added to adjust the pH to acidic condition (pH = 3). The organic phase was dried over anhydrous MgSO<sub>4</sub>, filtered, and concentrated in *vacuo*. Purification of the residue by column chromatography (petroleum ether/EtOAc = 8/1 - 4/1) gave the product (860 mg, 6.1 mmol, 53%).<sup>[2]</sup>

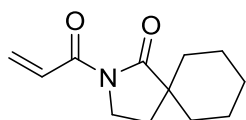

**2-Acryloyl-2-azaspiro[4.5]decan-1-one (2q)**, white solid, purified by flash column chromatography (eluent: petroleum ether / EtOAc = 13/1), 694 mg (50% yield). <sup>1</sup>H NMR (400 MHz, CDCl<sub>3</sub>) δ 7.47 (dd, *J* = 16.8, 10.4 Hz, 1H), 6.50 (dd, *J* = 17.0, 1.8 Hz, 1H), 5.84 (dd, *J* = 10.4, 1.6 Hz, 1H), 3.64 (s, 2H), 2.47 (s, 2H), 1.50 (s, 8H), 1.46 (s, 2H) ppm; <sup>13</sup>C NMR (100 MHz, CDCl<sub>3</sub>) δ 175.0, 166.2, 130.8, 129.3, 56.1, 46.3, 36.2, 34.8, 25.5, 22.6 ppm; HRMS (ESI) *m/z*: [M + H]<sup>+</sup> Calcd for C<sub>11</sub>H<sub>16</sub>NO<sub>2</sub> 208.1138; found 208.1139.

### General procedure B (2n as an example)

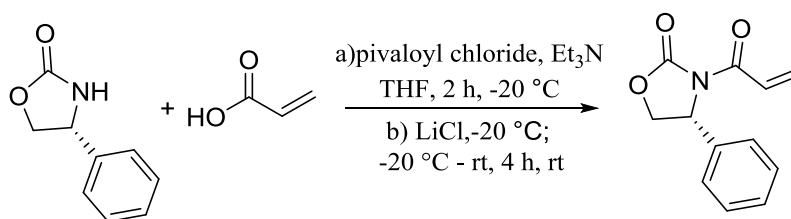

**Figure S3.** The synthesis of 3-acryloyl-4-phenyloxazolidin-2-one.

To the solution of acrylic acid (1.65 g, 22.9 mmol) and Et<sub>3</sub>N (2.5 equiv) in THF (volume corresponded to 0.2 M of the oxazolidinone) was added trimethylacetyl chloride (2.54 g, 21.1 mmol) at -20 °C. A white solid was formed instantaneously. The mixture was stirred at -20 °C for 2.0 h. Lithium chloride (0.82 g, 19.4 mmol) was added, followed by the oxazolidinone (2.87 g, 17.6 mmol). The mixture was allowed to warm to room temperature slowly and stirred for 4.0 h. The reaction was quenched

by addition of saturated  $\text{NH}_4\text{Cl}$  and the solution was extracted with EtOAc. The organic layer was washed subsequently with saturated  $\text{NaHCO}_3$ , brine and water, dried over anhydrous  $\text{Na}_2\text{SO}_4$  and filtered. EtOAc was removed in *vacuo*, and the residue was purified by flash column chromatography (silica gel, petroleum ether/EtOAc = 8/1 - 4/1) provided the desired product **2n** (2.73 g, 71%).<sup>[3]</sup>

### General procedure C (2u as an example)

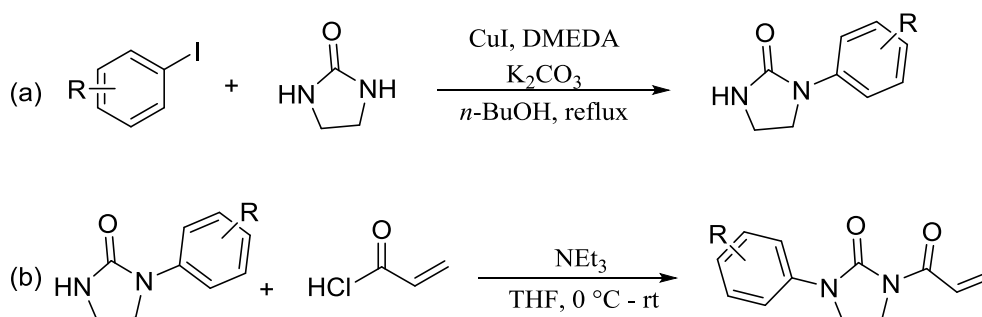

**Figure S4.** The synthesis of 1-acryloyl-3-phenylimidazolidin-2-one.

(a) A mixture of the aryl iodide (10 mmol), 2-imidazolidinone (5 equiv, 50 mmol), CuI (0.1 equiv, 1 mmol), *N,N'*-dimethylethylenediamine (0.3 equiv, 3 mmol) and  $\text{K}_2\text{CO}_3$  (3 equiv, 30 mmol) was stirred in *n*-butanol (40 mL) for 5 h at 100 °C. The crude reaction mixture was poured into a 10 % w/w  $\text{NH}_4\text{Cl}$  aqueous solution and the organic solvent was removed in *vacuo*. The residue was diluted with water and extracted with dichloromethane. The organic solution was washed with a 20 % w/w NaCl aqueous solution, dried over anhydrous  $\text{Na}_2\text{SO}_4$ , filtered and concentrated in *vacuo*. The resulting crude was purified by chromatography on silica gel using cyclohexane / EtOAc or pure EtOAc as eluent.<sup>[4]</sup>

(b) It was same as General procedure A.

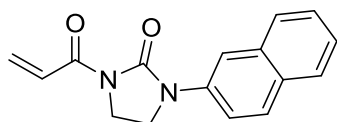

**1-Acryloyl-3-(naphthalen-2-yl)imidazolidin-2-one (2t)**, yellow solid, purified by flash column chromatography (eluent: petroleum ether / EtOAc = 10/1), 727 mg (47% yield).  $^1\text{H NMR}$  (400 MHz,  $\text{CDCl}_3$ )  $\delta$  7.91 – 7.82 (m, 3H), 7.68 (dd,  $J = 16.8, 10.4$  Hz,

1H), 7.57 – 7.48 (m, 4H), 7.44 (d,  $J = 7.2$  Hz, 1H), 6.55 (dd,  $J = 16.8, 1.6$  Hz, 1H), 5.80 (dd,  $J = 10.4, 2.0$  Hz, 1H), 4.17 (t,  $J = 8.0$  Hz, 2H), 3.91 (t,  $J = 8.0$  Hz, 2H) ppm;  $^{13}\text{C}$  NMR (100 MHz,  $\text{CDCl}_3$ )  $\delta$  165.8, 154.1, 134.6, 134.2, 129.9, 128.9, 128.7, 128.4, 127.1, 126.5, 125.6, 124.9, 122.3, 45.2, 40.3 ppm; HRMS (ESI)  $m/z$ :  $[\text{M} + \text{H}]^+$  Calcd for  $\text{C}_{16}\text{H}_{15}\text{N}_2\text{O}_2$  267.1134; found 267.1133.

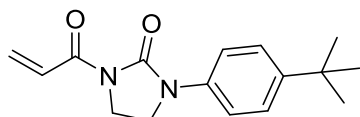

**1-Acryloyl-3-(4-(tert-butyl)phenyl)imidazolidin-2-one (2v)**, white solid, purified by flash column chromatography (eluent: petroleum ether / EtOAc = 10/1), 854 mg (54% yield).  $^1\text{H}$  NMR (400 MHz,  $\text{CDCl}_3$ )  $\delta$  7.66 (dd,  $J = 16.8, 10.4$  Hz, 1H), 7.44 (dd,  $J = 24.4, 8.8$  Hz, 4H), 6.52 (dd,  $J = 17.1, 1.9$  Hz, 1H), 5.83 (dd,  $J = 10.5, 1.9$  Hz, 1H), 4.06 – 4.02 (m, 2H), 3.94 – 3.90 (m, 2H), 1.32 (s, 9H) ppm;  $^{13}\text{C}$  NMR (101 MHz,  $\text{CDCl}_3$ )  $\delta$  165.9, 152.6, 147.7, 136.0, 129.9, 128.5, 126.0, 119.1, 41.9, 39.2, 31.3 ppm; HRMS (ESI)  $m/z$ :  $[\text{M} + \text{H}]^+$  Calcd for  $\text{C}_{16}\text{H}_{21}\text{N}_2\text{O}_2$  273.1603; found 273.1602.

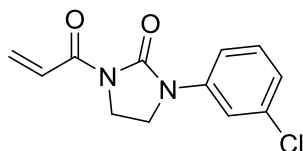

**1-Acryloyl-3-(3-chlorophenyl)imidazolidin-2-one (2w)**, yellow solid, purified by flash column chromatography (eluent: petroleum ether / EtOAc = 10/1), 683 mg (47% yield).  $^1\text{H}$  NMR (400 MHz,  $\text{CDCl}_3$ )  $\delta$  7.65 (t,  $J = 2.0$  Hz, 1H) 7.61 (dd,  $J = 16.8, 10.4$  Hz, 1H), 7.45 (ddd,  $J = 8.4, 2.0, 0.8$  Hz 1H), 7.32 (t,  $J = 8.0$  Hz, 1H), 7.15 (ddd,  $J = 8.0, 2.0, 0.8$  Hz 1H), 6.54 (dd,  $J = 17.0, 1.9$  Hz, 1H), 5.86 (dd,  $J = 10.6, 1.9$  Hz, 1H), 4.07 – 4.03 (m, 2H), 3.94 – 3.89 (m, 2H) ppm;  $^{13}\text{C}$  NMR (100 MHz,  $\text{CDCl}_3$ )  $\delta$  165.8, 152.4, 139.9, 134.9, 130.3, 130.1, 128.3, 124.5, 119.1, 116.8, 41.7, 39.1 ppm; HRMS (ESI)  $m/z$ :  $[\text{M} + \text{H}]^+$  Calcd for  $\text{C}_{12}\text{H}_{12}\text{ClN}_2\text{O}_2$  251.0587; found 251.0586.

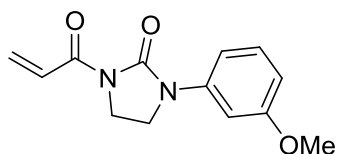

**1-Acryloyl-3-(3-methoxyphenyl)imidazolidin-2-one (2x)**, white solid, purified by flash column chromatography (eluent: petroleum ether / EtOAc = 18/1), 801 mg (56% yield).  $^1\text{H}$  NMR (400 MHz,  $\text{CDCl}_3$ )  $\delta$  7.64 (dd,  $J = 17.0, 10.6$  Hz, 1H), 7.31 – 7.27 (m, 2H), 7.06 (dd,  $J = 8.2, 1.4$  Hz, 1H), 6.72 (dd,  $J = 8.2, 1.8$  Hz, 1H), 6.53 (dd,  $J = 17.2, 2.0$  Hz, 1H), 5.84 (dd,  $J = 10.4, 2.0$  Hz, 1H), 4.05 – 4.01 (m, 2H), 3.94 – 3.89 (m, 2H), 3.83 (s, 3H) ppm;  $^{13}\text{C}$  NMR (100 MHz,  $\text{CDCl}_3$ )  $\delta$  165.8, 160.2, 152.5, 140.0, 130.0, 129.8, 128.5, 111.1, 110.2, 105.4, 55.4, 42.0, 39.1 ppm; HRMS (ESI)  $m/z$ :  $[\text{M} + \text{H}]^+$  Calcd for  $\text{C}_{13}\text{H}_{15}\text{N}_2\text{O}_3$  247.1083; found 247.1082.

### 3. Optimization of reaction conditions

#### 3.1 Screening of solvents in reactions<sup>a</sup>

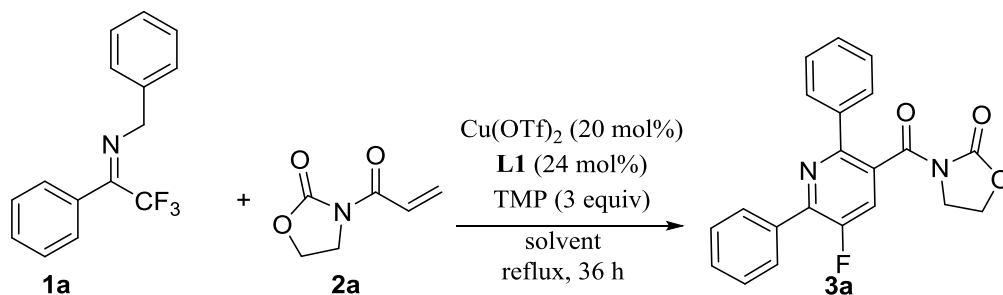

| entry | solvent           | yield(%) <sup>b</sup> |
|-------|-------------------|-----------------------|
| 1     | H <sub>2</sub> O  | trace                 |
| 2     | HFIP              | 23                    |
| 3     | THF               | trace                 |
| 4     | acetone           | 32                    |
| 5     | dioxane           | 43                    |
| 6     | DMF               | -                     |
| 7     | DMA               | -                     |
| 8     | PhCl              | trace                 |
| 9     | PhCF <sub>3</sub> | 25                    |
| 10    | <i>p</i> -xylene  | trace                 |
| 11    | hexafluorobenze   | 35                    |
| 12    | DCE: MeCN = 1:1   | 54                    |

<sup>a</sup> Unless otherwise specified,  $\text{Cu}(\text{OTf})_2$  (20 mol%), **L1** (24 mol%), **1a** (0.6 mmol) was added to a mixture of **2a** (0.2 mmol) and TMP (0.3 mmol) in 1.0 mL of dry solvent. The solution was heated at 85 °C for 36 h. <sup>b</sup> Isolated yields.



3.2 Screening of base in reactions<sup>a</sup>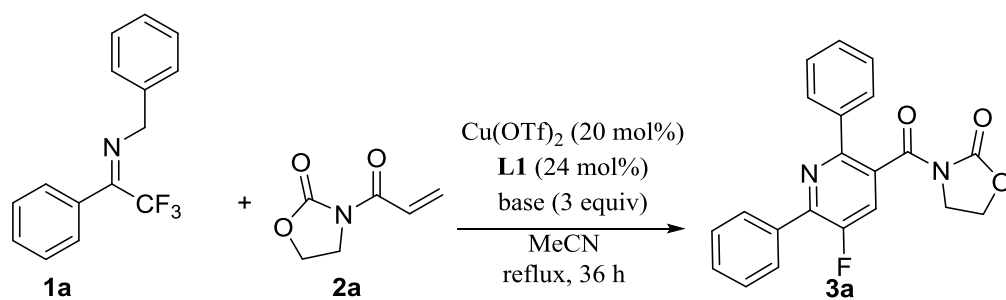

| entry | base                     | yield(%) <sup>b</sup> |
|-------|--------------------------|-----------------------|
| 1     | TMP                      | 52                    |
| 2     | PMP                      | 48                    |
| 3     | DIPEA                    | trace                 |
| 4     | TBD                      | -                     |
| 5     | DABCO                    | -                     |
| 6     | KHMDS                    | 36                    |
| 7     | $\text{K}_2\text{CO}_3$  | 34                    |
| 8     | $\text{K}_3\text{PO}_4$  | 35                    |
| 9     | $\text{KO}^t\text{Bu}$   | 29                    |
| 10    | $\text{Na}_2\text{CO}_3$ | 36                    |
| 11    | $\text{NaHCO}_3$         | trace                 |
| 12    | TBAF                     | 23                    |

<sup>a</sup> Unless otherwise specified,  $\text{Cu}(\text{OTf})_2$  (20 mol%), **L1** (24 mol%), **1a** (0.6 mmol) was added to a mixture of **2a** (0.2 mmol) and base (0.3 mmol) in 1.0 mL of dry MeCN. The solution was heated for 36 h at 85 °C. <sup>b</sup> Isolated yields.

3.3 Screening of  $\text{CuX}_n$  and ligand in reactions<sup>a</sup>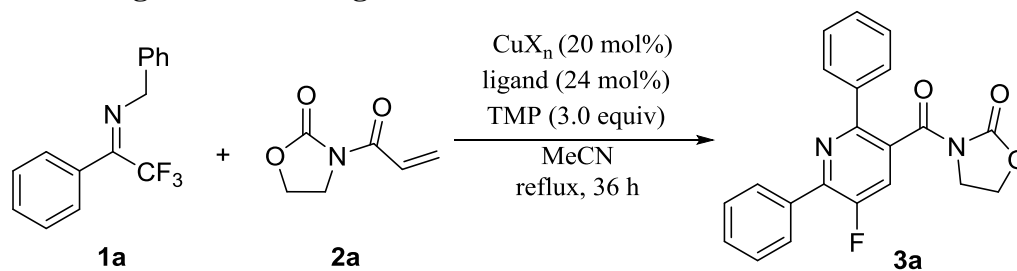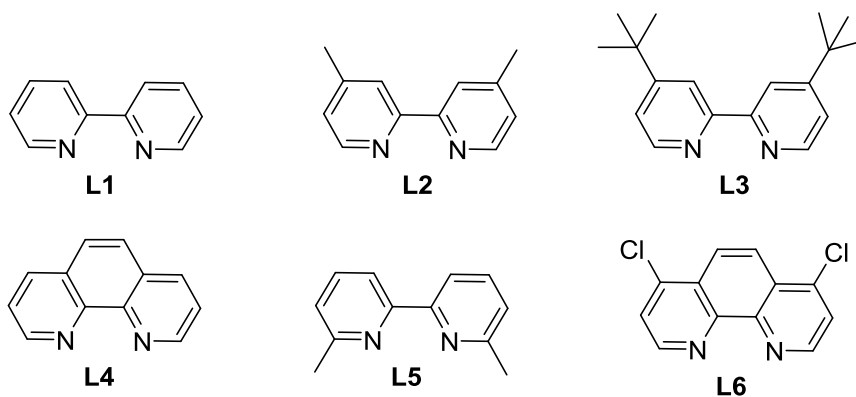

| entry | $\text{CuX}_n$            | Ligand    | yield(%) <sup>b</sup> |
|-------|---------------------------|-----------|-----------------------|
| 1     | $\text{Cu}(\text{OAc})_2$ | <b>L1</b> | 42                    |
| 2     | $\text{CuBr}_2$           | <b>L1</b> | 40                    |
| 3     | $\text{CuBr}$             | <b>L1</b> | 20                    |
| 4     | $\text{CuCl}$             | <b>L1</b> | 35                    |
| 5     | $\text{Cu}(\text{OTf})_2$ | <b>L2</b> | 56                    |
| 6     | $\text{Cu}(\text{OTf})_2$ | <b>L3</b> | 48                    |
| 7     | $\text{Cu}(\text{OTf})_2$ | <b>L4</b> | 62                    |
| 8     | $\text{Cu}(\text{OTf})_2$ | <b>L5</b> | 55                    |
| 9     | $\text{Cu}(\text{OTf})_2$ | <b>L6</b> | 61                    |

<sup>a</sup> Reaction conditions: <sup>a</sup> Unless otherwise specified,  $\text{CuX}_n$  (20 mol%), ligand (24 mol%), **1a** (0.6 mmol) was added to a mixture of **2a** (0.2 mmol) and TMP (0.6 mmol) in 2.0 mL of dry MeCN. The solution was heated for 48 h at 85 °C. <sup>b</sup> Isolated yields.

## 4. General procedure for the synthesis of products 3 and their characterization data.

### 4.1 General procedure for the synthesis of products (3a as an example).

The reaction was carried out in a flame-dried test tube under an argon atmosphere.  $\text{Cu}(\text{OTf})_2$  (18.4 mg, 0.04 mmol, 20 mol %) and Ligand 4 (16 mg, 0.048 mmol, 24 mol %) were charged to the test tube and followed by addition of freshly distilled MeCN (1.0 mL). This solution was stirred 1.5 h at room temperature under magnetic stirring. Afterwards, 3-acryloyloxazolidin-2-one **2a** (28.4 mg, 0.2 mmol) and the additional freshly distilled MeCN (1.0 mL) were added to this mixture solution successively and stirred for another 0.75 h. Then **1a** (263.1 mg, 1 mmol, 5 equiv) and TMP (0.6 mmol, 84.8 mg) were added. The mixture was moved to 85 °C oil bath and refluxed for 48 h. After completion of the reaction, the solution was cooled to room temperature. The reaction was quenched with distilled water (0.6 mL) and extracted with ether (5 mL). The combined organic phases was removed under reduced pressure and the residue was purified by flash chromatography (petroleum ether / EtOAc = 5/1 to 3/1) to give the desired product **3a** as yellow oil (45 mg, 66 % yield).

### 4.2 Characterization data for products.

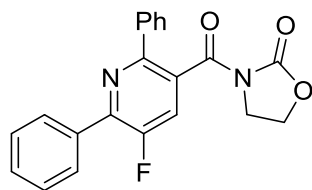

**3-(5-Fluoro-2,6-diphenylnicotinoyl)oxazolidin-2-one (3a, yellow oil)**, purified by flash column chromatography (eluent: petroleum ether / EtOAc = 4/1), 45 mg (66% yield).  $^1\text{H}$  NMR (400 MHz,  $\text{CDCl}_3$ ):  $\delta$  8.11 (d,  $J = 7.6$  Hz, 2H), 7.63 – 7.59 (m, 3H), 7.52 – 7.47 (m, 3H), 7.46 – 7.43 (m, 3H), 4.04 (t,  $J = 7.6$  Hz, 2H), 3.92 (t,  $J = 7.6$  Hz, 2H) ppm;  $^{13}\text{C}$  NMR (100 MHz,  $\text{CDCl}_3$ ):  $\delta$  167.4, 156.1 (d,  $J = 260.7$  Hz) 152.5 (d,  $J = 5.4$  Hz), 151.9, 146.8 (d,  $J = 10.3$  Hz), 138.7, 134.7 (d,  $J = 5.7$  Hz), 129.8, 129.2, 129.1, 129.0, 128.8, 128.5, 128.3, 124.4 (d,  $J = 23.7$  Hz), 62.4, 42.8 ppm;  $^{19}\text{F}$  NMR (375 MHz,  $\text{CDCl}_3$ )  $\delta$  -126.11 (d,  $J = 10.1$  Hz); HRMS (ESI)  $m/z$ :  $[\text{M} + \text{H}]^+$  Calcd for

C<sub>21</sub>H<sub>16</sub>FN<sub>2</sub>O<sub>3</sub> 363.1145; Found 363.1146.

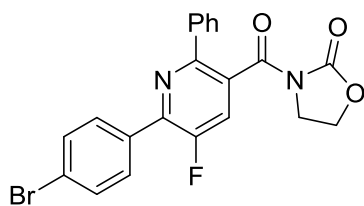

**3-(6-(4-Bromophenyl)-5-fluoro-2-phenylnicotinoyl)oxazolidin-2-one (3b)**, yellow oil), purified by flash column chromatography (eluent: petroleum ether / EtOAc = 4/1), 54 mg (61% yield). <sup>1</sup>H NMR (400 MHz, CDCl<sub>3</sub>): δ 8.01 (dd, *J* = 8.4, 0.8 Hz, 2H), 7.63 (s, 1H), 7.61 – 7.58 (m, 4H), 7.46 – 7.44 (m, 3H), 4.05 (t, *J* = 7.6 Hz, 2H), 3.93 (t, *J* = 7.6 Hz, 2H) ppm; <sup>13</sup>C NMR (150 MHz, CDCl<sub>3</sub>): δ 167.2, 156.0 (d, *J* = 260.9 Hz) 152.6 (d, *J* = 5.1 Hz), 151.9, 145.5 (d, *J* = 9.9 Hz), 138.5, 133.5 (d, *J* = 6.2 Hz), 131.7, 130.7 (d, *J* = 6.8 Hz), 129.1, 128.9 (d, *J* = 2.7 Hz), 128.8, 128.3, 124.5, 124.5 (d, *J* = 23.7 Hz), 62.4, 42.8 ppm; <sup>19</sup>F NMR (565 MHz, CDCl<sub>3</sub>) δ -125.64 (d, *J* = 10.3 Hz); HRMS (ESI) *m/z*: [M + H]<sup>+</sup> Calcd for C<sub>21</sub>H<sub>15</sub>BrFN<sub>2</sub>O<sub>3</sub> 441.0250; Found 441.0252.

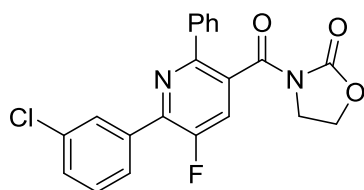

**3-(6-(3-Chlorophenyl)-5-fluoro-2-phenylnicotinoyl)oxazolidin-2-one (3c)**, brown oil), purified by flash column chromatography (eluent: petroleum ether / EtOAc = 4/1), 51 mg (62% yield). <sup>1</sup>H NMR (400 MHz, CDCl<sub>3</sub>): δ 8.13 (s, 1H), 8.02 – 8.00 (m, 1H), 7.65 – 7.59 (m, 3H), 7.46 – 7.42 (m, 5H), 4.06 (t, *J* = 7.6 Hz, 2H), 3.93 (t, *J* = 7.6 Hz, 2H) ppm; <sup>13</sup>C NMR (150 MHz, CDCl<sub>3</sub>): δ 167.1, 156.1 (d, *J* = 261.2 Hz), 152.6 (d, *J* = 5.4 Hz), 151.9, 145.1 (d, *J* = 9.8 Hz), 138.5, 136.3 (d, *J* = 5.6 Hz), 134.6, 129.8, 129.7, 129.2, 129.2, 129.1, 128.8, 128.3, 127.3 (d, *J* = 6.9 Hz), 124.5 (d, *J* = 23.7 Hz), 62.4, 42.7 ppm; <sup>19</sup>F NMR (565 MHz, CDCl<sub>3</sub>) δ -125.60 (d, *J* = 10.4 Hz); HRMS (ESI) *m/z*: [M + H]<sup>+</sup> Calcd for C<sub>21</sub>H<sub>15</sub>ClFN<sub>2</sub>O<sub>3</sub> 397.0755; Found 397.0753.

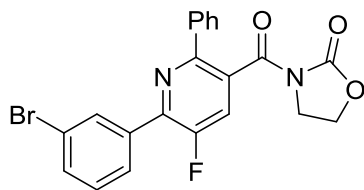

**3-(6-(3-Bromophenyl)-5-fluoro-2-phenylnicotinoyl)oxazolidin-2-one (3d**, yellow oil), purified by flash column chromatography (eluent: petroleum ether / EtOAc = 4/1), 54 mg (63% yield).  $^1\text{H}$  NMR (600 MHz,  $\text{CDCl}_3$ ):  $\delta$  8.26 (s, 1H), 8.04 (dd,  $J$  = 7.8, 1.2 Hz, 1H), 7.64 (d,  $J$  = 10.2 Hz, 1H), 7.60 – 7.58 (m, 3H), 7.46 – 7.44 (m, 3H), 7.37 (t,  $J$  = 7.8 Hz, 1H), 4.06 (t,  $J$  = 7.2 Hz, 2H), 3.93 (t,  $J$  = 7.8 Hz, 2H) ppm;  $^{13}\text{C}$  NMR (150 MHz,  $\text{CDCl}_3$ ):  $\delta$  167.1, 156.1 (d,  $J$  = 262.0 Hz), 152.7 (d,  $J$  = 5.6 Hz), 152.0, 145.1 (d,  $J$  = 11.1 Hz), 138.3, 136.4 (d,  $J$  = 5.6 Hz), 132.8, 132.0 (d,  $J$  = 5.4 Hz), 130.0, 129.3 (d,  $J$  = 4.3 Hz), 129.2, 128.8, 128.3, 127.7 (d,  $J$  = 6.9 Hz), 124.6 (d,  $J$  = 23.2 Hz), 122.7, 62.4, 42.7 ppm;  $^{19}\text{F}$  NMR (565 MHz,  $\text{CDCl}_3$ )  $\delta$  -125.45 (d,  $J$  = 10.1 Hz) ppm; HRMS (ESI)  $m/z$ :  $[\text{M} + \text{H}]^+$  Calcd for  $\text{C}_{21}\text{H}_{15}\text{BrFN}_2\text{O}_3$  441.0250; Found 441.0249

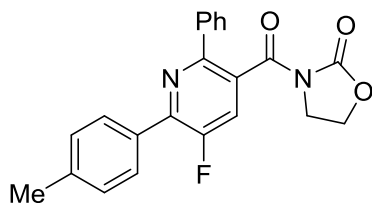

**3-(5-Fluoro-2-phenyl-6-(p-tolyl)nicotinoyl)oxazolidin-2-one (3e**, yellow oil), purified by flash column chromatography (eluent: petroleum ether / EtOAc = 4/1), 47 mg (64% yield).  $^1\text{H}$  NMR (400 MHz,  $\text{CDCl}_3$ ):  $\delta$  8.02 (d,  $J$  = 7.2 Hz, 2H), 7.61 – 7.59 (m, 3H), 7.44 – 7.43 (m, 3H), 7.30 (d,  $J$  = 8.0 Hz, 2H), 4.04 (t,  $J$  = 7.6 Hz, 2H), 3.92 (t,  $J$  = 7.6 Hz, 2H) ppm;  $^{13}\text{C}$  NMR (150 MHz,  $\text{CDCl}_3$ ):  $\delta$  167.5, 156.0 (d,  $J$  = 260.6 Hz), 152.4 (d,  $J$  = 5.3 Hz), 151.9, 146.9 (d,  $J$  = 10.4 Hz), 140.0, 138.8, 131.9 (d,  $J$  = 5.6 Hz), 129.2, 129.1, 129.0, 128.9, 128.8, 128.2, 124.2 (d,  $J$  = 23.6 Hz), 62.3, 42.8, 21.4 ppm;  $^{19}\text{F}$  NMR (565 MHz,  $\text{CDCl}_3$ )  $\delta$  -126.13 (d,  $J$  = 10.3 Hz); HRMS (ESI)  $m/z$ :  $[\text{M} + \text{H}]^+$  Calcd for  $\text{C}_{22}\text{H}_{18}\text{FN}_2\text{O}_3$  377.1301; Found 377.1300.

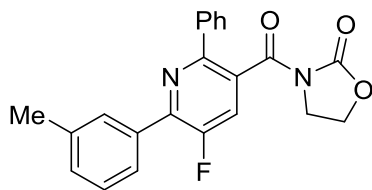

**3-(5-Fluoro-2-phenyl-6-(m-tolyl)nicotinoyl)oxazolidin-2-one (3f, yellow oil)**, purified by flash column chromatography (eluent: petroleum ether / EtOAc = 4/1), 48 mg (65% yield).  $^1\text{H}$  NMR (400 MHz,  $\text{CDCl}_3$ ):  $\delta$  7.91 – 7.87 (m, 2H), 7.62 – 7.60 (m, 3H), 7.45 – 7.43 (m, 3H), 7.38 (t,  $J = 7.6$  Hz, 1H), 7.28 (s, 1H), 4.04 (t,  $J = 7.6$  Hz, 2H), 3.93 (t,  $J = 7.6$  Hz, 2H), 2.44 (s, 3H) ppm;  $^{13}\text{C}$  NMR (150 MHz,  $\text{CDCl}_3$ ):  $\delta$  167.4, 156.0 (d,  $J = 260.7$  Hz), 152.5 (d,  $J = 5.4$  Hz), 151.9, 147.1 (d,  $J = 10.2$  Hz), 138.8, 138.1, 134.6 (d,  $J = 5.4$  Hz), 130.6, 129.7 (d,  $J = 5.0$  Hz), 129.0, 128.8, 128.4 (d,  $J = 3.8$  Hz), 128.3, 128.2, 126.3 (d,  $J = 6.8$  Hz), 124.2 (d,  $J = 23.6$  Hz), 62.3, 42.8, 21.6 ppm;  $^{19}\text{F}$  NMR (565 MHz,  $\text{CDCl}_3$ )  $\delta$  -125.96 (d,  $J = 10.2$  Hz) ppm; HRMS (ESI)  $m/z$ :  $[\text{M} + \text{H}]^+$  Calcd for  $\text{C}_{22}\text{H}_{18}\text{FN}_2\text{O}_3$  377.1301; Found 377.1302.

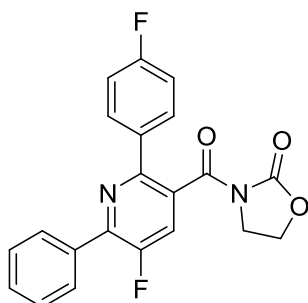

**3-(5-Fluoro-2-(4-fluorophenyl)-6-phenylnicotinoyl)oxazolidin-2-one (3g, yellow oil)**, purified by flash column chromatography (eluent: petroleum ether / EtOAc = 4/1), 49 mg (62% yield).  $^1\text{H}$  NMR (400 MHz,  $\text{CDCl}_3$ ):  $\delta$  8.09 (d,  $J = 7.6$  Hz, 2H), 7.62 – 7.58 (m, 3H), 7.52 – 7.45 (m, 3H), 7.13 (t,  $J = 8.6$  Hz, 2H), 4.17 (t,  $J = 7.8$  Hz, 2H), 3.98 (t,  $J = 7.8$  Hz, 2H) ppm;  $^{13}\text{C}$  NMR (150 MHz,  $\text{CDCl}_3$ ):  $\delta$  167.2, 163.3 (d,  $J = 248.1$  Hz), 156.0 (d,  $J = 261.0$  Hz), 151.8, 151.32 (d,  $J = 4.5$  Hz), 146.9 (d,  $J = 10.8$  Hz), 134.9 (d,  $J = 3.5$  Hz), 134.5 (d,  $J = 6.0$  Hz), 130.7 (d,  $J = 8.3$  Hz), 129.9, 129.1 (d,  $J = 5.9$  Hz), 128.5, 128.4 (d,  $J = 3.2$  Hz), 124.3 (d,  $J = 24.0$  Hz), 115.3 (d,  $J = 21.6$  Hz), 62.3, 42.7 ppm;  $^{19}\text{F}$  NMR (565 MHz,  $\text{CDCl}_3$ )  $\delta$  -112.04 – -112.16 (m), -125.98 (d,  $J = 10.4$  Hz) ppm; HRMS (ESI)  $m/z$ :  $[\text{M} + \text{H}]^+$  Calcd for  $\text{C}_{21}\text{H}_{15}\text{F}_2\text{N}_2\text{O}_3$  381.1051;

Found 381.1052

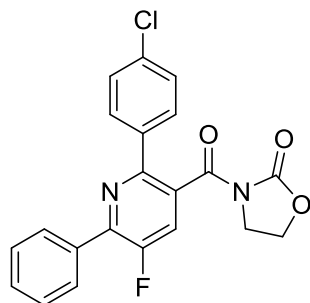

**3-(2-(4-Chlorophenyl)-5-fluoro-6-phenylnicotinoyl)oxazolidin-2-one (3h**, brown oil), purified by flash column chromatography (eluent: petroleum ether / EtOAc = 4/1), 49 mg (61% yield).  $^1\text{H}$  NMR (600 MHz,  $\text{CDCl}_3$ ):  $\delta$  8.02 (d,  $J = 7.8$  Hz, 2H), 7.52 (d,  $J = 10.2$  Hz, 1H), 7.48 (d,  $J = 8.4$  Hz, 2H), 7.44 – 7.38 (m, 3H), 7.34 (d,  $J = 8.4$  Hz, 2H), 4.10 (t,  $J = 7.8$  Hz, 2H), 3.91 (t,  $J = 7.8$  Hz, 2H) ppm;  $^{13}\text{C}$  NMR (150 MHz,  $\text{CDCl}_3$ ):  $\delta$  167.1, 156.1 (d,  $J = 260.7$  Hz), 151.8, 151.2 (d,  $J = 4.8$  Hz), 146.9 (d,  $J = 11.0$  Hz), 137.2, 135.3, 134.5 (d,  $J = 5.4$  Hz), 130.7 (d,  $J = 8.3$  Hz), 130.1, 129.9, 129.1 (d,  $J = 6.5$  Hz), 128.5, 124.3 (d,  $J = 24.4$  Hz), 115.3 (d,  $J = 21.9$  Hz), 62.3, 42.7 ppm;  $^{19}\text{F}$  NMR (375 MHz,  $\text{CDCl}_3$ )  $\delta$  -125.55 (dd,  $J = 28.3, 10.3$  Hz) ppm; HRMS (ESI)  $m/z$ :  $[\text{M} + \text{H}]^+$  Calcd for  $\text{C}_{21}\text{H}_{15}\text{ClFN}_2\text{O}_3$  397.0755; Found 397.0753.

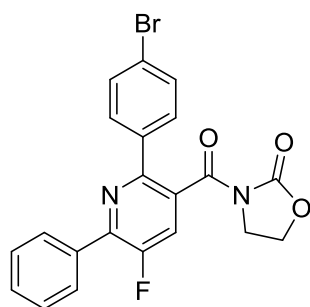

**3-(2-(4-Bromophenyl)-5-fluoro-6-phenylnicotinoyl)oxazolidin-2-one (3i**, yellow oil), purified by flash column chromatography (eluent: petroleum ether / EtOAc = 4/1), 59 mg (67% yield).  $^1\text{H}$  NMR (400 MHz,  $\text{CDCl}_3$ ):  $\delta$  8.08 (d,  $J = 7.8$  Hz, 2H), 7.61 – 7.55 (m, 3H), 7.52 – 7.41 (m, 5H), 4.18 (t,  $J = 7.8$  Hz, 2H), 3.98 (t,  $J = 7.8$  Hz, 2H) ppm;  $^{13}\text{C}$  NMR (150 MHz,  $\text{CDCl}_3$ ):  $\delta$  167.0, 156.1 (d,  $J = 261.9$  Hz), 151.9, 151.2 (d,  $J = 5.6$  Hz), 147.0 (d,  $J = 11.0$  Hz), 137.5, 134.4 (d,  $J = 5.6$  Hz), 131.5, 130.4, 130.1,

129.9, 129.1 (d,  $J = 5.8$  Hz), 128.6, 124.4 (d,  $J = 23.4$  Hz), 123.7, 62.4, 42.7 ppm;  $^{19}\text{F}$  NMR (375 MHz,  $\text{CDCl}_3$ )  $\delta$  -125.55 (dd,  $J = 40.1, 10.1$  Hz) ppm; HRMS (ESI)  $m/z$ :  $[\text{M} + \text{H}]^+$  Calcd for  $\text{C}_{21}\text{H}_{15}\text{BrFN}_2\text{O}_3$  441.0250; Found 441.0250.

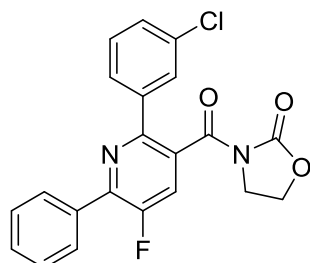

**3-(2-(3-Chlorophenyl)-5-fluoro-6-phenylnicotinoyl)oxazolidin-2-one (3j)**, brown oil, purified by flash column chromatography (eluent: petroleum ether / EtOAc = 4/1), 50 mg (62% yield).  $^1\text{H}$  NMR (600 MHz,  $\text{CDCl}_3$ ):  $\delta$  8.09 (d,  $J = 8.4$ , 2H), 7.63 – 7.61 (m, 2H), 7.52 – 7.48 (m, 4H), 7.43 – 7.41 (m, 1H), 7.38 (d,  $J = 7.2$  Hz, 2H), 4.18 (t,  $J = 7.8$  Hz, 2H), 4.00 (t,  $J = 7.8$  Hz, 2H) ppm;  $^{13}\text{C}$  NMR (150 MHz,  $\text{CDCl}_3$ ):  $\delta$  167.0, 156.2 (d,  $J = 264.1$  Hz), 151.9, 150.7 (d,  $J = 5.4$  Hz), 147.1 (d,  $J = 11.1$  Hz), 140.3, 134.4 (d,  $J = 5.6$  Hz), 134.2, 130.0, 129.6, 129.2, 129.1 (d,  $J = 5.4$  Hz), 128.9, 128.6, 128.5, 127.1, 124.5 (d,  $J = 23.6$  Hz), 62.4, 42.7 ppm;  $^{19}\text{F}$  NMR (565 MHz,  $\text{CDCl}_3$ )  $\delta$  -125.11 (d,  $J = 9.0$  Hz) ppm; HRMS (ESI)  $m/z$ :  $[\text{M} + \text{H}]^+$  Calcd for  $\text{C}_{21}\text{H}_{15}\text{ClFN}_2\text{O}_3$  397.0755; Found 397.0756.

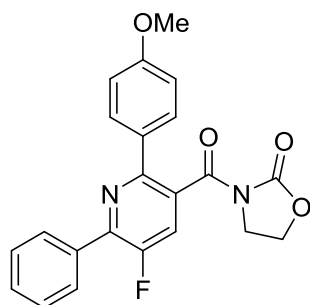

**3-(5-Fluoro-2-(4-methoxyphenyl)-6-phenylnicotinoyl)oxazolidin-2-one (3k)**, yellow oil, purified by flash column chromatography (eluent: petroleum ether / EtOAc = 3/1), 42 mg (51% yield).  $^1\text{H}$  NMR (400 MHz,  $\text{CDCl}_3$ ):  $\delta$  8.08 (d,  $J = 8.4$  Hz, 2H), 7.60 (d,  $J = 10.2$  Hz, 1H), 7.55 (d,  $J = 9.0$  Hz, 1H), 7.51 – 7.46 (m, 3H), 6.96 (d,



$J = 8.4$  Hz, 2H), 4.13 (t,  $J = 9.0$  Hz, 2H), 3.97 (t,  $J = 8.4$  Hz, 2H), 3.86 (s, 3H) ppm;  $^{13}\text{C}$  NMR (150 MHz,  $\text{CDCl}_3$ ):  $\delta$  167.4, 160.4, 155.8 (d,  $J = 260.1$  Hz), 152.1 (d,  $J = 4.5$  Hz), 151.9, 145.6 (d,  $J = 10.3$  Hz), 134.5 (d,  $J = 5.6$  Hz), 131.0, 130.2, 129.8, 129.2 (d,  $J = 5.6$  Hz), 128.5, 128.2 (d,  $J = 2.8$  Hz), 124.4 (d,  $J = 23.6$  Hz), 62.3, 55.4, 42.8 ppm;  $^{19}\text{F}$  NMR (565 MHz,  $\text{CDCl}_3$ )  $\delta$  -126.76 (d,  $J = 10.2$  Hz) ppm; HRMS (ESI)  $m/z$ :  $[\text{M} + \text{H}]^+$  Calcd for  $\text{C}_{22}\text{H}_{18}\text{FN}_2\text{O}_4$  393.1251; Found 393.1250.

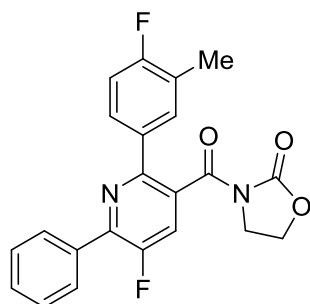

**3-(5-Fluoro-2-(4-fluoro-3-methylphenyl)-6-phenylnicotinoyl)oxazolidin-2-one (31**, yellow oil), purified by flash column chromatography (eluent: petroleum ether / EtOAc = 4/1), 49 mg (64% yield).  $^1\text{H}$  NMR (400 MHz,  $\text{CDCl}_3$ ):  $\delta$  8.02 (dd,  $J = 6.6$ , 1.8 Hz, 2H), 7.63 (d,  $J = 10.2$  Hz, 1H), 7.51 – 7.48 (m, 4H), 7.33 – 7.30 (m, 1H), 7.05 (t,  $J = 9.0$  Hz, 1H), 4.18 (t,  $J = 7.8$  Hz, 2H), 3.97 (t,  $J = 7.8$  Hz, 2H), 2.33 (s, 3H) ppm;  $^{13}\text{C}$  NMR (150 MHz,  $\text{CDCl}_3$ ):  $\delta$  167.0, 162.0 (d,  $J = 246.9$  Hz), 156.0 (d,  $J = 260.6$  Hz), 152.0, 151.6 (d,  $J = 4.6$  Hz), 147.1 (d,  $J = 11.2$  Hz), 133.7 (dd,  $J = 18.1$ , 5.4 Hz), 132.3 (d,  $J = 6.1$  Hz), 130.1, 129.2 (d,  $J = 5.6$  Hz), 128.8 (d,  $J = 3.1$  Hz), 128.6, 127.7 (d,  $J = 8.2$  Hz), 125.4 (d,  $J = 18.0$  Hz), 124.7 (d,  $J = 23.4$  Hz), 114.8 (d,  $J = 22.2$  Hz), 62.4, 42.7, 14.6 (d,  $J = 2.8$  Hz) ppm;  $^{19}\text{F}$  NMR (565 MHz,  $\text{CDCl}_3$ )  $\delta$  -116.51 (s), -126.22 (d,  $J = 10.2$  Hz) ppm; HRMS (ESI)  $m/z$ :  $[\text{M} + \text{H}]^+$  Calcd for  $\text{C}_{22}\text{H}_{17}\text{F}_2\text{N}_2\text{O}_4$  395.1207; Found 395.1208.

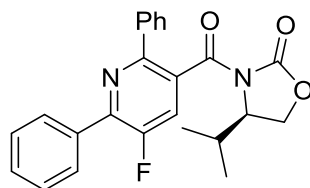

**(R)-3-(5-Fluoro-2,6-diphenylnicotinoyl)-4-isopropylloxazolidin-2-one (3m**, yellow

oil), purified by flash column chromatography (eluent: petroleum ether / EtOAc = 5/1), 52 mg (65% yield).  $^1\text{H}$  NMR (400 MHz,  $\text{CDCl}_3$ ):  $\delta$  8.10 (d,  $J = 7.8$  Hz, 2H), 7.58 – 7.50 (m, 3H), 7.50 – 7.41 (m, 4H), 7.38 (d,  $J = 3.4$  Hz, 5H), 7.17 (d,  $J = 3.0$  Hz, 2H), 5.28 (dd,  $J = 7.9, 3.0$  Hz, 1H), 4.21 (t,  $J = 8.2$  Hz, 1H), 4.13 (dd,  $J = 8.8, 3.5$  Hz, 1H) ppm;  $^{13}\text{C}$  NMR (100 MHz,  $\text{CDCl}_3$ ):  $\delta$  167.2, 156.0 (d,  $J = 260.5$  Hz) 152.7, 152.1 (d,  $J = 4.8$  Hz), 146.5 (d,  $J = 10.3$  Hz), 138.8, 134.7 (d,  $J = 5.6$  Hz), 129.7, 129.2, 129.1, 129.0, 129.0, 128.5, 128.4, 123.9 (d,  $J = 22.3$  Hz), 63.7, 59.3, 28.8, 18.1, 14.7 ppm;  $^{19}\text{F}$  NMR (375 MHz,  $\text{CDCl}_3$ )  $\delta$  -126.28 (s) ppm; HRMS (ESI)  $m/z$ :  $[\text{M} + \text{H}]^+$  Calcd for  $\text{C}_{24}\text{H}_{22}\text{FN}_2\text{O}_3$  405.1614; Found 405.1615.  $[\alpha]_{\text{D}}^{23} = 50.5^\circ$  ( $c = 0.075$ ,  $\text{CH}_2\text{Cl}_2$ ).

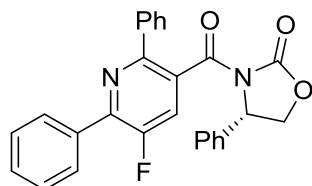

(S)-3-(5-Fluoro-2,6-diphenylnicotinoyl)-4-phenyloxazolidin-2-one (**3n**, yellow oil), purified by flash column chromatography (eluent: petroleum ether / EtOAc = 5/1), 52 mg (62% yield).  $^1\text{H}$  NMR (400 MHz,  $\text{CDCl}_3$ ):  $\delta$  8.10 (d,  $J = 7.6$  Hz, 2H), 7.57 – 7.51 (m, 3H), 7.49 – 7.42 (m, 4H), 7.38 – 7.37 (m, 5H), 7.17 (d,  $J = 3.2$  Hz, 2H), 5.28 (dd,  $J = 7.6, 2.8$  Hz, 1H), 4.21 (t,  $J = 8.0$  Hz, 1H), 4.13 (dd,  $J = 8.8, 3.6$  Hz, 1H) ppm;  $^{13}\text{C}$  NMR (100 MHz,  $\text{CDCl}_3$ ):  $\delta$  166.7, 156.0 (d,  $J = 261.0$  Hz), 152.4 (d,  $J = 5.1$  Hz), 152.2, 146.6 (d,  $J = 10.6$  Hz), 138.6, 137.8, 134.7 (d,  $J = 5.6$  Hz), 129.8, 129.3, 129.2 (d,  $J = 6.0$  Hz), 129.0, 128.9, 128.8, 128.7 (d,  $J = 3.0$  Hz), 128.6, 128.5, 126.3, 124.2 (d,  $J = 23.7$  Hz), 70.3, 58.2 ppm;  $^{19}\text{F}$  NMR (375 MHz,  $\text{CDCl}_3$ )  $\delta$  -126.29 (d,  $J = 9.3$  Hz) ppm; HRMS (ESI)  $m/z$ :  $[\text{M} + \text{H}]^+$  Calcd for  $\text{C}_{24}\text{H}_{22}\text{FN}_2\text{O}_3$  439.1458; Found 439.1457.  $[\alpha]_{\text{D}}^{23} = 76.3^\circ$  ( $c = 0.064$ ,  $\text{CH}_2\text{Cl}_2$ ).

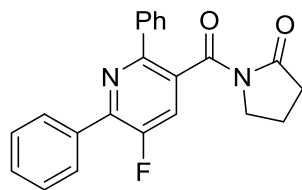

**1-(5-Fluoro-2,6-diphenylnicotinoyl)pyrrolidin-2-one (3o)**, white oil, purified by flash column chromatography (eluent: petroleum ether / EtOAc = 5/1), 40 mg (55% yield).  $^1\text{H}$  NMR (400 MHz,  $\text{CDCl}_3$ ):  $\delta$  8.04 (d,  $J = 8.0$  Hz, 2H), 7.53 (s, 1H), 7.50 – 7.48 (m, 2H), 7.44 – 7.37 (m, 3H), 7.35 – 7.34 (m, 3H), 3.63 (t,  $J = 7.0$  Hz, 2H), 1.98 (t,  $J = 7.8$  Hz, 2H), 1.63 – 1.60 (m, 2H) ppm;  $^{13}\text{C}$  NMR (150 MHz,  $\text{CDCl}_3$ ):  $\delta$  172.9, 166.9, 155.2 (d,  $J = 260.6$  Hz), 151.2 (d,  $J = 4.9$  Hz), 145.2 (d,  $J = 10.8$  Hz), 138.0, 133.8 (d,  $J = 6.0$  Hz), 129.3 (d,  $J = 2.9$  Hz), 128.6, 128.1 (d,  $J = 6.2$  Hz), 127.9, 127.8, 127.4, 127.1, 123.2 (d,  $J = 23.6$  Hz), 44.5, 31.2, 16.4 ppm;  $^{19}\text{F}$  NMR (565 MHz,  $\text{CDCl}_3$ )  $\delta$  -126.24 (d,  $J = 10.5$  Hz) ppm; HRMS (ESI)  $m/z$ :  $[\text{M} + \text{H}]^+$  Calcd for  $\text{C}_{22}\text{H}_{18}\text{FN}_2\text{O}_2$  361.1352; Found 361.1347.

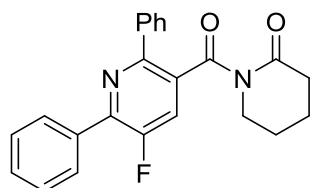

**1-(5-Fluoro-2,6-diphenylnicotinoyl)piperidin-2-one (3p)**, yellow oil, purified by flash column chromatography (eluent: petroleum ether / EtOAc = 5/1), 35 mg (47% yield).  $^1\text{H}$  NMR (400 MHz,  $\text{CDCl}_3$ ):  $\delta$  8.08 (d,  $J = 8.0$  Hz, 2H), 7.64 (d,  $J = 10.4$  Hz, 1H), 7.54 – 7.52 (m, 2H), 7.50 – 7.41 (m, 6H), 3.64 (t,  $J = 5.8$  Hz, 2H), 1.84 (t,  $J = 6.2$  Hz, 2H), 1.49 – 1.42 (m, 4H) ppm;  $^{13}\text{C}$  NMR (100 MHz,  $\text{CDCl}_3$ ):  $\delta$  172.8, 171.1, 156.5 (d,  $J = 260.0$  Hz), 150.7 (d,  $J = 5.0$  Hz), 145.7 (d,  $J = 10.9$  Hz), 139.1, 134.9 (d,  $J = 5.7$  Hz), 132.5 (d,  $J = 3.6$  Hz), 129.5, 129.2, 129.1, 128.7 (s), 128.4, 128.3, 124.3 (d,  $J = 23.4$  Hz), 45.3, 33.7, 21.9, 20.3 ppm;  $^{19}\text{F}$  NMR (375 MHz,  $\text{CDCl}_3$ )  $\delta$  -126.16 (d,  $J = 10.7$  Hz) ppm; HRMS (ESI)  $m/z$ :  $[\text{M} + \text{H}]^+$  Calcd for  $\text{C}_{23}\text{H}_{20}\text{FN}_2\text{O}_2$  375.1509; Found 375.1510.

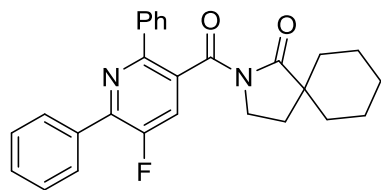

**2-(5-Fluoro-2,6-diphenylnicotinoyl)-2-azaspiro[4.5]decan-1-one (3q, yellow oil)**, purified by flash column chromatography (eluent: petroleum ether / EtOAc = 5/1), 42 mg (52% yield).  $^1\text{H}$  NMR (400 MHz,  $\text{CDCl}_3$ ):  $\delta$  8.10 (d,  $J$  = 8.0 Hz, 2H), 7.58 – 7.56 (m, 2H), 7.53 (s, 1H), 7.50 – 7.44 (m, 3H), 7.43 – 7.35 (m, 3H), 3.49 (s, 2H), 1.97 (s, 2H), 1.42 – 1.29 (m, 6H) 1.08 (br, 4H) ppm;  $^{13}\text{C}$  NMR (100 MHz,  $\text{CDCl}_3$ ):  $\delta$  173.2, 168.0, 156.2 (d,  $J$  = 260.6 Hz), 152.1 (d,  $J$  = 5.3 Hz), 146.0 (d,  $J$  = 10.1 Hz), 139.1, 134.9 (d,  $J$  = 5.4 Hz), 130.7 (d,  $J$  = 3.2 Hz), 129.6, 129.1 (d,  $J$  = 6.5 Hz), 128.9, 128.7, 128.4, 128.3, 123.9 (d,  $J$  = 23.4 Hz), 55.6, 45.3, 35.7, 34.8, 25.3, 22.5 ppm;  $^{19}\text{F}$  NMR (565 MHz,  $\text{CDCl}_3$ )  $\delta$  -126.43 (d,  $J$  = 10.5 Hz) ppm; HRMS (ESI)  $m/z$ :  $[\text{M} + \text{H}]^+$  Calcd for  $\text{C}_{27}\text{H}_{26}\text{FN}_2\text{O}_2$  429.1978; Found 429.1979.

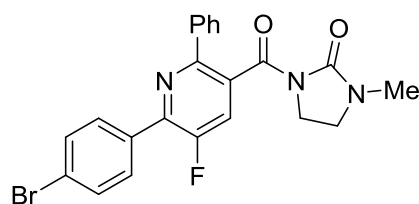

**1-(6-(4-Bromophenyl)-5-fluoro-2-phenylnicotinoyl)-3-methylimidazolidin-2-one (3r, yellow oil)**, purified by flash column chromatography (eluent: petroleum ether / EtOAc = 1/2), 52 mg (57% yield),  $^1\text{H}$  NMR (600 MHz,  $\text{CDCl}_3$ )  $\delta$  8.00 (d,  $J$  = 7.8 Hz, 2H), 7.61 – 7.58 (m, 4H), 7.57 (d,  $J$  = 10.8 Hz, 1H), 7.41 – 7.37 (m, 3H), 3.78 (s, 2H), 3.12 (s, 2H), 2.59 (s, 3H) ppm;  $^{13}\text{C}$  NMR (150 MHz,  $\text{CDCl}_3$ )  $\delta$  167.0, 156.1 (d,  $J$  = 260.6 Hz), 153.1, 152.3 (d,  $J$  = 5.1 Hz), 144.6 (d,  $J$  = 9.9 Hz), 139.0, 133.9 (d,  $J$  = 6.2 Hz), 131.6, 130.7 (d,  $J$  = 2.8 Hz), 130.7 (d,  $J$  = 6.0 Hz), 128.8, 128.6, 127.9, 124.1 (d,  $J$  = 23.3 Hz), 124.1, 43.3, 39.8, 30.4 ppm;  $^{19}\text{F}$  NMR (565 MHz,  $\text{CDCl}_3$ )  $\delta$  -126.20 (d,  $J$  = 10.4 Hz) ppm; HRMS (ESI)  $m/z$ :  $[\text{M} + \text{H}]^+$  Calcd for  $\text{C}_{22}\text{H}_{18}\text{BrFN}_3\text{O}_2$  454.0566; Found 454.0544.

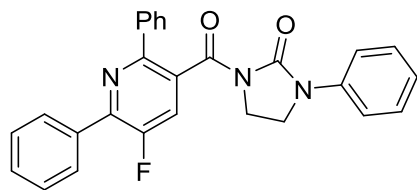

**1-(5-Fluoro-2,6-diphenylnicotinoyl)-3-phenylimidazolidin-2-one (3s, yellow oil)**, purified by flash column chromatography (eluent: petroleum ether / EtOAc = 5/1), 52 mg (54% yield).  $^1\text{H}$  NMR (400 MHz,  $\text{CDCl}_3$ ):  $\delta$  8.10 (d,  $J$  = 8.0 Hz, 2H), 7.64 – 7.59 (m, 3H), 7.49 – 7.41 (m, 3H), 7.35 – 7.34 (m, 3H), 7.31 – 7.27 (m, 2H), 7.24 – 7.22 (m, 2H), 7.11 (t,  $J$  = 7.2 Hz, 1H), 3.88 (s, 2H), 3.54 (s, 2H) ppm;  $^{13}\text{C}$  NMR (100 MHz,  $\text{CDCl}_3$ ):  $\delta$  166.4, 155.1 (d,  $J$  = 260.2 Hz), 151.2 (d,  $J$  = 5.0 Hz), 150.0, 145.1 (d,  $J$  = 10.3 Hz), 138.1, 137.0, 133.9 (d,  $J$  = 5.6 Hz), 129.2 (d,  $J$  = 3.5 Hz), 128.5, 128.1 (d,  $J$  = 6.3 Hz), 127.9, 127.8, 127.6, 127.4, 127.0, 123.7, 123.4 (d,  $J$  = 23.4 Hz), 118.2, 41.1, 38.5 ppm;  $^{19}\text{F}$  NMR (375 MHz,  $\text{CDCl}_3$ )  $\delta$  -126.24 (d,  $J$  = 10.2 Hz) ppm; HRMS (ESI)  $m/z$ :  $[\text{M} + \text{H}]^+$  Calcd for  $\text{C}_{27}\text{H}_{21}\text{FN}_3\text{O}_2$  438.1618; Found 438.1619.

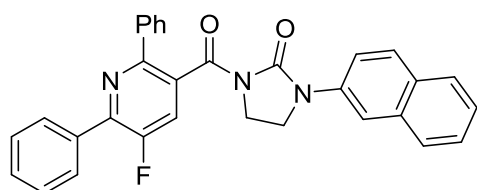

**1-(5-Fluoro-2,6-diphenylnicotinoyl)-3-(naphthalen-2-yl)imidazolidin-2-one (3t, yellow oil)**, purified by flash column chromatography (eluent: petroleum ether / EtOAc = 4/1), 52 mg (58% yield).  $^1\text{H}$  NMR (400 MHz,  $\text{CDCl}_3$ ):  $\delta$  8.02 (d,  $J$  = 7.6 Hz, 2H), 7.84 – 7.82 (m, 1H), 7.79 (d,  $J$  = 8.4 Hz, 1H), 7.72 (d,  $J$  = 6.8 Hz, 2H), 7.64 (d,  $J$  = 10.4 Hz, 1H), 7.59 – 7.50 (m, 3H), 7.48 – 7.38 (m, 6H), 7.05 (d,  $J$  = 4.8 Hz, 1H), 4.09 (s, 2H), 3.63 (s, 2H) ppm;  $^{13}\text{C}$  NMR (100 MHz,  $\text{CDCl}_3$ ):  $\delta$  167.7, 156.2 (d,  $J$  = 260.1 Hz), 152.4, 152.0 (d,  $J$  = 4.9 Hz), 146.0 (d,  $J$  = 10.7 Hz), 139.3, 134.9 (d,  $J$  = 5.8 Hz), 134.5, 133.5, 130.0 (d,  $J$  = 3.6 Hz), 129.7, 129.5, 129.1, 129.0, 128.9, 128.7, 128.6, 128.4, 128.3, 127.1, 126.6, 124.6, 124.4, 124.1 (d,  $J$  = 23.5 Hz) 122.1, 45.2, 40.6 ppm;  $^{19}\text{F}$  NMR (375 MHz,  $\text{CDCl}_3$ )  $\delta$  -126.64 (d,  $J$  = 10.0 Hz) ppm; HRMS (ESI)  $m/z$ :  $[\text{M} + \text{H}]^+$  Calcd for  $\text{C}_{31}\text{H}_{23}\text{FN}_3\text{O}_2$  488.1774; Found 488.1775.

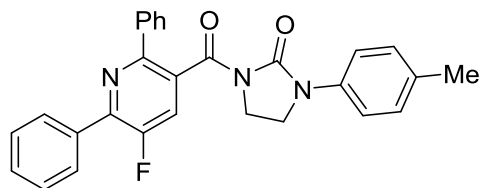

**1-(5-Fluoro-2,6-diphenylnicotinoyl)-3-(p-tolyl)imidazolidin-2-one (3u, yellow oil)**, purified by flash column chromatography (eluent: petroleum ether / EtOAc = 4/1), 52 mg (60% yield).  $^1\text{H}$  NMR (400 MHz,  $\text{CDCl}_3$ ):  $\delta$  8.10 (d,  $J = 8.0$  Hz, 2H), 7.64 (s, 1H), 7.61 – 7.59 (m, 2H), 7.49 – 7.40 (m, 3H), 7.36 – 7.35 (m, 3H), 7.10 (s, 4H), 3.88 (s, 2H), 3.53 (s, 2H), 2.29 (s, 3H) ppm;  $^{13}\text{C}$  NMR (100 MHz,  $\text{CDCl}_3$ ):  $\delta$  167.5, 156.2 (d,  $J = 260.1$  Hz), 152.3 (d,  $J = 5.1$  Hz), 151.0, 146.1 (d,  $J = 10.4$  Hz), 139.2, 135.5, 134.9 (d,  $J = 5.7$  Hz), 134.6, 130.3 (d,  $J = 3.4$  Hz), 129.6, 129.5, 129.2 (d,  $J = 6.3$  Hz), 128.8, 128.6, 128.4, 128.0, 124.0 (d,  $J = 23.5$  Hz), 119.4, 42.3, 39.6, 20.8 ppm;  $^{19}\text{F}$  NMR (375 MHz,  $\text{CDCl}_3$ )  $\delta$  -126.46 (d,  $J = 10.7$  Hz) ppm; HRMS (ESI)  $m/z$ :  $[\text{M} + \text{H}]^+$  Calcd for  $\text{C}_{28}\text{H}_{23}\text{FN}_3\text{O}_2$  452.1774; Found 452.1775.

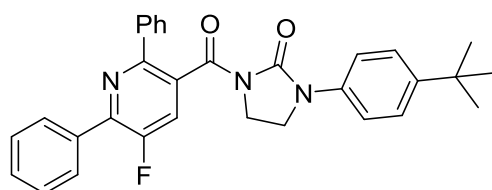

**1-(4-(tert-Butyl)phenyl)-3-(5-fluoro-2,6-diphenylnicotinoyl)imidazolidin-2-one (3v, yellow oil)**, purified by flash column chromatography (eluent: petroleum ether / EtOAc = 3/1), 52 mg (57% yield).  $^1\text{H}$  NMR (400 MHz,  $\text{CDCl}_3$ ):  $\delta$  8.02 (d,  $J = 8.0$  Hz, 2H), 7.56 – 7.53 (m, 3H), 7.40 – 7.37 (m, 3H), 7.30 – 7.28 (m, 3H), 7.22 (t,  $J = 8.2$  Hz, 2H), 7.07 (d,  $J = 8.4$  Hz, 2H), 3.81 (s, 2H), 3.47 (s, 2H), 1.20 (s, 9H) ppm;  $^{13}\text{C}$  NMR (100 MHz,  $\text{CDCl}_3$ ):  $\delta$  167.5, 156.1 (d,  $J = 260.2$  Hz), 152.2 (d,  $J = 5.0$  Hz), 151.1, 148.0, 146.1 (d,  $J = 10.6$  Hz), 139.2, 135.4, 135.0 (d,  $J = 5.8$  Hz), 130.3 (d,  $J = 3.2$  Hz), 129.5, 129.1 (d,  $J = 6.1$  Hz), 128.8, 128.6, 128.4, 128.0, 125.9, 123.9 (d,  $J = 23.6$  Hz), 119.3, 42.3, 39.6, 34.4, 31.3 ppm;  $^{19}\text{F}$  NMR (375 MHz,  $\text{CDCl}_3$ )  $\delta$  -126.50 (d,  $J = 10.4$  Hz) ppm; HRMS (ESI)  $m/z$ :  $[\text{M} + \text{H}]^+$  Calcd for  $\text{C}_{31}\text{H}_{29}\text{FN}_3\text{O}_2$  494.2244; Found 494.2243.

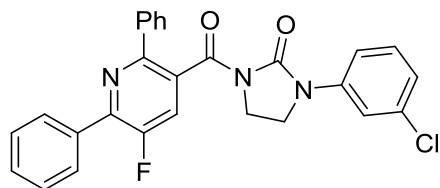

**1-(3-Chlorophenyl)-3-(5-fluoro-2,6-diphenylnicotinoyl)imidazolidin-2-one (3w)**, yellow oil), purified by flash column chromatography (eluent: petroleum ether / EtOAc = 4/1), 52 mg (58% yield).  $^1\text{H}$  NMR (400 MHz,  $\text{CDCl}_3$ ):  $\delta$  8.12 – 8.10 (m, 2H), 7.63 (dd,  $J = 10.4, 3.0$  Hz, 1H), 7.60 – 7.58 (m, 2H), 7.49 – 7.42 (m, 3H), 7.35 – 7.34 (m, 3H), 7.28 – 7.24 (m, 1H), 7.20 (td,  $J = 8.0, 2.8$  Hz, 1H), 7.13 (d,  $J = 8.4$  Hz, 1H), 7.07 (d,  $J = 8.0$  Hz, 1H), 3.87 (s, 2H), 3.49 (s, 2H) ppm;  $^{13}\text{C}$  NMR (100 MHz,  $\text{CDCl}_3$ ):  $\delta$  167.4, 156.2 (d,  $J = 260.4$  Hz), 152.3 (d,  $J = 5.1$  Hz), 150.9, 146.3 (d,  $J = 10.3$  Hz), 139.3, 139.1, 134.8 (d,  $J = 5.7$  Hz), 134.7, 130.0, 129.9, 129.7, 129.2 (d,  $J = 6.3$  Hz), 128.8, 128.7, 128.4, 128.0, 124.6, 124.1 (d,  $J = 23.4$  Hz), 119.1, 116.9, 42.0, 39.5 ppm;  $^{19}\text{F}$  NMR (375 MHz,  $\text{CDCl}_3$ )  $\delta$  -126.21 (d,  $J = 10.4$  Hz) ppm; HRMS (ESI)  $m/z$ :  $[\text{M} + \text{H}]^+$  Calcd for  $\text{C}_{27}\text{H}_{20}\text{ClFN}_3\text{O}_2$  472.1228; Found 472.1227.

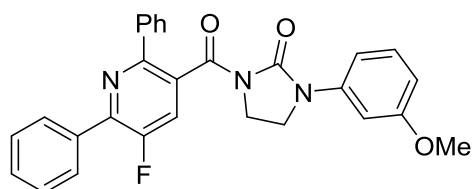

**1-(5-Fluoro-2,6-diphenylnicotinoyl)-3-(3-methoxyphenyl)imidazolidin-2-one (3x)**, yellow oil), purified by flash column chromatography (eluent: petroleum ether / EtOAc = 4/1), 52 mg (60% yield).  $^1\text{H}$  NMR (400 MHz,  $\text{CDCl}_3$ ):  $\delta$  8.11 (d,  $J = 7.8$  Hz, 2H), 7.65 – 7.59 (m, 3H), 7.50 – 7.40 (m, 3H), 7.36 – 7.34 (m, 3H), 7.19 (t,  $J = 8.4$  Hz, 1H), 6.90 (s, 1H), 6.78 (dd,  $J = 8.0, 1.2$  Hz, 1H), 6.66 (dd,  $J = 8.2, 1.8$  Hz, 1H), 3.87 (s, 2H), 3.76 (s, 3H), 3.53 (s, 2H) ppm;  $^{13}\text{C}$  NMR (100 MHz,  $\text{CDCl}_3$ ):  $\delta$  167.4, 160.0, 156.2 (d,  $J = 260.3$  Hz), 152.3 (d,  $J = 5.2$  Hz), 150.9, 146.1 (d,  $J = 10.3$  Hz), 139.3, 139.1, 134.9 (d,  $J = 5.7$  Hz), 130.2 (d,  $J = 3.2$  Hz), 129.7, 129.6, 129.2 (d,  $J = 6.3$  Hz), 128.8, 128.7, 128.4, 128.0, 124.1 (d,  $J = 23.4$  Hz), 111.3, 110.1, 105.6, 55.4, 42.2, 39.5 ppm;  $^{19}\text{F}$  NMR (375 MHz,  $\text{CDCl}_3$ )  $\delta$  -126.38 (d,  $J = 10.4$  Hz) ppm; HRMS (ESI)

m/z:  $[M + H]^+$  Calcd for  $C_{28}H_{23}FN_3O_3$  468.1723; Found 468.1724.

### 4.3 Gram-Scale Experiments (3a as the example).

Under argon atmosphere,  $Cu(OTf)_2$  (653.2 mg, 1.42 mmol, 20 mol %) and ligand **L4** (568 mg, 1.7 mmol, 24 mol %) were charged to the test tube and followed by addition of freshly distilled MeCN (15 mL). This solution was stirred for 1.5 h at room temperature. Afterwards, 3-acryloyloxazolidin-2-one **2a** (1.0 g, 7.1 mmol) was added into the mixture and stirred for another 0.75 h. Then **1a** (9.34 g, 35.5 mmol, 5 equiv) and 2,2,6,6-tetramethylpiperidine (3.0 g, 21.3 mmol) were added. The mixture was refluxed for 48 h in oil bath. After completion of the reaction, the solution was cooled to room temperature. The reaction was quenched with distilled water and extracted with  $CH_2Cl_2$ . The combined organic phase was removed under reduced pressure and the residue was purified by flash chromatography (petroleum ether / EtOAc = 5/1 to 3/1) to give the desired product **3a** as yellow oil (1.49 g, 58% yield).

### 4.4 General Procedure for the Synthesis of Products 4a.

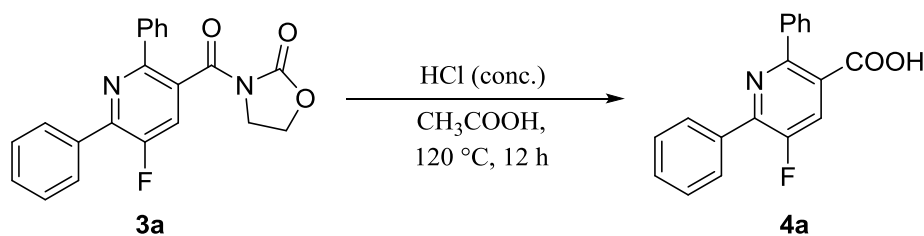

To a flame-dried test tube with a magnetic stirring bar was charged **3a** (724 mg, 2.0 mmol), HCl (conc. 0.3 mL, 5.0 mmol) and  $CH_3COOH$  (1.2 mL, 20 mmol) under  $N_2$ . The reaction was stirred at 120 for 12 h. The reaction mixture was then cooled to room temperature, the organic solvent was removed in *vacuo*. The residue was diluted with  $NaHCO_3$  and extracted with dichloromethane. The organic solution was washed with NaCl solution, dried over anhydrous  $Na_2SO_4$ , filtered and concentrated in *vacuo*. The resulting crude was purified by flash chromatography ( $MeOH / CH_2Cl_2 = 1/15$ ) to give the desired product **4a** as yellow oil (316 mg, 54 % yield).



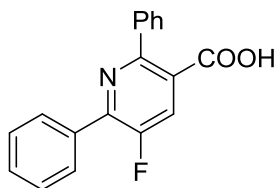

**5-Fluoro-2,6-diphenylnicotinic acid (4a)**, yellow oil, purified by flash column chromatography (eluent: MeOH / CH<sub>2</sub>Cl<sub>2</sub> = 1/8), 316 mg (54% yield). <sup>1</sup>H NMR (600 MHz, CDCl<sub>3</sub>) δ 8.04 (d, *J* = 7.8 Hz, 2H), 7.93 (d, *J* = 10.8 Hz, 1H), 7.53 (dd, *J* = 6.2, 2.6 Hz, 2H), 7.44 – 7.39 (m, 3H), 7.34 (t, *J* = 2.7 Hz, 3H). ppm; <sup>13</sup>C NMR (150 MHz, CDCl<sub>3</sub>) δ 169.7, 154.7 (d, *J* = 261.2 Hz), 154.3, 146.7 (d, *J* = 10.1 Hz), 138.2, 133.3 (d, *J* = 6.0 Hz), 129.1, 128.3, 128.2, 128.0, 127.8, 127.5, 127.0, 125.8 (d, *J* = 23.3 Hz) ppm; <sup>19</sup>F NMR (565 MHz, CDCl<sub>3</sub>) δ -126.19 (d, *J* = 10.4 Hz) ppm; HRMS (ESI) *m/z*: [M + H]<sup>+</sup> Calcd for C<sub>18</sub>H<sub>13</sub>FNO<sub>2</sub> 294.0930; Found 294.0935.

## 5. Determination of X-ray crystallographic structure 3r

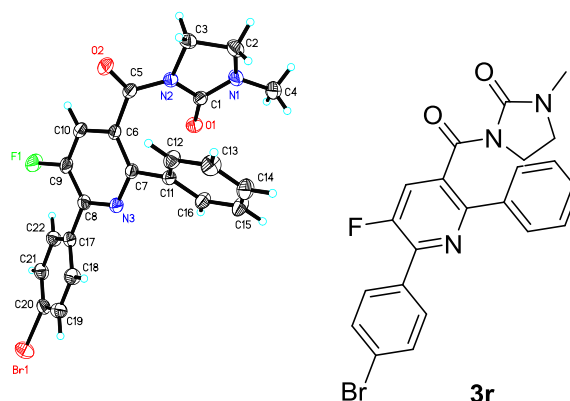

**Figure S5.** X-Ray crystal structure of compound **3r**.

Table 1. Crystal data and structure refinement for mo\_d8v191122\_0m.

|                      |                                                                    |          |
|----------------------|--------------------------------------------------------------------|----------|
| Identification code  | mo_d8v191122_0m                                                    |          |
| Empirical formula    | C <sub>22</sub> H <sub>17</sub> Br F N <sub>3</sub> O <sub>2</sub> |          |
| Formula weight       | 454.29                                                             |          |
| Temperature          | 293(2) K                                                           |          |
| Wavelength           | 0.71073 Å                                                          |          |
| Crystal system       | Monoclinic                                                         |          |
| Space group          | P 21/n                                                             |          |
| Unit cell dimensions | a = 8.8225(3) Å                                                    | α = 90 ° |

|                                         |                                                              |                              |
|-----------------------------------------|--------------------------------------------------------------|------------------------------|
|                                         | $b = 20.5256(8) \text{ \AA}$                                 | $\beta = 104.6210(10)^\circ$ |
|                                         | $c = 11.2425(4) \text{ \AA}$                                 | $\gamma = 90^\circ$          |
| Volume                                  | 1969.94(12) $\text{\AA}^3$                                   |                              |
| Z                                       | 4                                                            |                              |
| Density (calculated)                    | 1.532 $\text{Mg/m}^3$                                        |                              |
| Absorption coefficient                  | 2.120 $\text{mm}^{-1}$                                       |                              |
| F(000)                                  | 920                                                          |                              |
| Crystal size                            | 0.170 x 0.140 x 0.110 $\text{mm}^3$                          |                              |
| Theta range for data collection         | 2.584 to 25.993 $^\circ$                                     |                              |
| Index ranges                            | $-10 \leq h \leq 10, -25 \leq k \leq 25, -13 \leq l \leq 13$ |                              |
| Reflections collected                   | 29622                                                        |                              |
| Independent reflections                 | 3853 [R(int) = 0.0365]                                       |                              |
| Completeness to theta = 25.242 $^\circ$ | 99.6 %                                                       |                              |
| Absorption correction                   | Semi-empirical from equivalents                              |                              |
| Max. and min. transmission              | 0.7456 and 0.5236                                            |                              |
| Refinement method                       | Full-matrix least-squares on $F^2$                           |                              |
| Data / restraints / parameters          | 3853 / 0 / 264                                               |                              |
| Goodness-of-fit on $F^2$                | 1.030                                                        |                              |
| Final R indices [ $I > 2\sigma(I)$ ]    | R1 = 0.0325, wR2 = 0.0790                                    |                              |
| R indices (all data)                    | R1 = 0.0468, wR2 = 0.0871                                    |                              |
| Extinction coefficient                  | 0.0066(11)                                                   |                              |
| Largest diff. peak and hole             | 0.333 and -0.489 $\text{e.\AA}^{-3}$                         |                              |

Table 2. Atomic coordinates ( $\times 10^4$ ) and equivalent isotropic displacement parameters ( $\text{\AA}^2 \times 10^3$ ) for mo\_d8v191122\_0m.  $U(\text{eq})$  is defined as one third of the trace of the orthogonalized  $U^{ij}$  tensor.

|       | x       | y       | z        | U(eq) |
|-------|---------|---------|----------|-------|
| Br(1) | 8501(1) | 4330(1) | 9296(1)  | 77(1) |
| F(1)  | 7421(2) | 4379(1) | 3146(1)  | 71(1) |
| O(1)  | 8939(2) | 6876(1) | 1775(1)  | 49(1) |
| O(2)  | 5059(2) | 5903(1) | -403(1)  | 64(1) |
| N(1)  | 8261(2) | 7578(1) | 137(2)   | 51(1) |
| N(2)  | 6762(2) | 6718(1) | 104(1)   | 42(1) |
| N(3)  | 6722(2) | 6039(1) | 3861(2)  | 40(1) |
| C(1)  | 8106(2) | 7048(1) | 800(2)   | 38(1) |
| C(2)  | 6947(3) | 7682(1) | -913(2)  | 59(1) |
| C(3)  | 6224(3) | 7011(1) | -1120(2) | 51(1) |
| C(4)  | 9405(3) | 8077(1) | 606(2)   | 69(1) |
| C(5)  | 6033(3) | 6179(1) | 393(2)   | 43(1) |
| C(6)  | 6425(2) | 5931(1) | 1690(2)  | 39(1) |
| C(7)  | 6364(2) | 6297(1) | 2727(2)  | 38(1) |
| C(8)  | 7125(2) | 5406(1) | 4025(2)  | 39(1) |
| C(9)  | 7120(3) | 5025(1) | 3005(2)  | 45(1) |
| C(10) | 6772(3) | 5274(1) | 1840(2)  | 46(1) |
| C(11) | 5890(2) | 6997(1) | 2642(2)  | 38(1) |
| C(12) | 4547(3) | 7213(1) | 1804(2)  | 49(1) |
| C(13) | 4167(3) | 7872(1) | 1727(2)  | 57(1) |
| C(14) | 5115(3) | 8313(1) | 2475(2)  | 59(1) |
| C(15) | 6445(3) | 8106(1) | 3308(2)  | 57(1) |
| C(16) | 6824(3) | 7452(1) | 3401(2)  | 46(1) |
| C(17) | 7497(2) | 5148(1) | 5301(2)  | 41(1) |
| C(18) | 6742(3) | 5403(1) | 6145(2)  | 50(1) |
| C(19) | 7036(3) | 5170(1) | 7329(2)  | 54(1) |
| C(20) | 8112(3) | 4679(1) | 7683(2)  | 48(1) |
| C(21) | 8901(3) | 4419(1) | 6885(2)  | 50(1) |
| C(22) | 8581(3) | 4652(1) | 5693(2)  | 48(1) |

Table 3. Bond lengths [ $\text{\AA}$ ] and angles [ $^\circ$ ] for mo\_d8v191122\_0m.

---

|             |          |
|-------------|----------|
| Br(1)-C(20) | 1.898(2) |
| F(1)-C(9)   | 1.354(2) |
| O(1)-C(1)   | 1.208(2) |
| O(2)-C(5)   | 1.213(2) |
| N(1)-C(1)   | 1.344(3) |
| N(1)-C(4)   | 1.441(3) |
| N(1)-C(2)   | 1.447(3) |
| N(2)-C(5)   | 1.359(3) |
| N(2)-C(1)   | 1.418(3) |
| N(2)-C(3)   | 1.467(2) |
| N(3)-C(7)   | 1.343(2) |
| N(3)-C(8)   | 1.348(3) |
| C(2)-C(3)   | 1.511(3) |
| C(2)-H(2A)  | 0.9700   |
| C(2)-H(2B)  | 0.9700   |
| C(3)-H(3A)  | 0.9700   |
| C(3)-H(3B)  | 0.9700   |
| C(4)-H(4A)  | 0.9600   |
| C(4)-H(4B)  | 0.9600   |
| C(4)-H(4C)  | 0.9600   |
| C(5)-C(6)   | 1.501(3) |
| C(6)-C(10)  | 1.384(3) |
| C(6)-C(7)   | 1.399(3) |
| C(7)-C(11)  | 1.492(3) |
| C(8)-C(9)   | 1.387(3) |
| C(8)-C(17)  | 1.486(3) |
| C(9)-C(10)  | 1.367(3) |
| C(10)-H(10) | 0.9300   |
| C(11)-C(16) | 1.386(3) |
| C(11)-C(12) | 1.388(3) |
| C(12)-C(13) | 1.390(3) |
| C(12)-H(12) | 0.9300   |
| C(13)-C(14) | 1.368(4) |
| C(13)-H(13) | 0.9300   |
| C(14)-C(15) | 1.371(4) |
| C(14)-H(14) | 0.9300   |

---

|                  |            |
|------------------|------------|
| C(15)-C(16)      | 1.381(3)   |
| C(15)-H(15)      | 0.9300     |
| C(16)-H(16)      | 0.9300     |
| C(17)-C(22)      | 1.389(3)   |
| C(17)-C(18)      | 1.391(3)   |
| C(18)-C(19)      | 1.377(3)   |
| C(18)-H(18)      | 0.9300     |
| C(19)-C(20)      | 1.373(3)   |
| C(19)-H(19)      | 0.9300     |
| C(20)-C(21)      | 1.375(3)   |
| C(21)-C(22)      | 1.384(3)   |
| C(21)-H(21)      | 0.9300     |
| C(22)-H(22)      | 0.9300     |
|                  |            |
| C(1)-N(1)-C(4)   | 122.16(19) |
| C(1)-N(1)-C(2)   | 113.52(17) |
| C(4)-N(1)-C(2)   | 122.4(2)   |
| C(5)-N(2)-C(1)   | 129.63(17) |
| C(5)-N(2)-C(3)   | 119.81(17) |
| C(1)-N(2)-C(3)   | 110.43(16) |
| C(7)-N(3)-C(8)   | 120.10(17) |
| O(1)-C(1)-N(1)   | 127.99(19) |
| O(1)-C(1)-N(2)   | 126.40(18) |
| N(1)-C(1)-N(2)   | 105.60(17) |
| N(1)-C(2)-C(3)   | 102.21(18) |
| N(1)-C(2)-H(2A)  | 111.3      |
| C(3)-C(2)-H(2A)  | 111.3      |
| N(1)-C(2)-H(2B)  | 111.3      |
| C(3)-C(2)-H(2B)  | 111.3      |
| H(2A)-C(2)-H(2B) | 109.2      |
| N(2)-C(3)-C(2)   | 101.83(17) |
| N(2)-C(3)-H(3A)  | 111.4      |
| C(2)-C(3)-H(3A)  | 111.4      |
| N(2)-C(3)-H(3B)  | 111.4      |
| C(2)-C(3)-H(3B)  | 111.4      |
| H(3A)-C(3)-H(3B) | 109.3      |
| N(1)-C(4)-H(4A)  | 109.5      |
| N(1)-C(4)-H(4B)  | 109.5      |

---

|                   |            |
|-------------------|------------|
| H(4A)-C(4)-H(4B)  | 109.5      |
| N(1)-C(4)-H(4C)   | 109.5      |
| H(4A)-C(4)-H(4C)  | 109.5      |
| H(4B)-C(4)-H(4C)  | 109.5      |
| O(2)-C(5)-N(2)    | 119.60(19) |
| O(2)-C(5)-C(6)    | 120.33(19) |
| N(2)-C(5)-C(6)    | 120.07(17) |
| C(10)-C(6)-C(7)   | 118.42(18) |
| C(10)-C(6)-C(5)   | 116.01(17) |
| C(7)-C(6)-C(5)    | 125.41(18) |
| N(3)-C(7)-C(6)    | 121.98(18) |
| N(3)-C(7)-C(11)   | 115.79(17) |
| C(6)-C(7)-C(11)   | 122.22(17) |
| N(3)-C(8)-C(9)    | 118.97(18) |
| N(3)-C(8)-C(17)   | 117.59(17) |
| C(9)-C(8)-C(17)   | 123.41(18) |
| F(1)-C(9)-C(10)   | 117.89(19) |
| F(1)-C(9)-C(8)    | 119.73(19) |
| C(10)-C(9)-C(8)   | 122.35(19) |
| C(9)-C(10)-C(6)   | 118.04(19) |
| C(9)-C(10)-H(10)  | 121.0      |
| C(6)-C(10)-H(10)  | 121.0      |
| C(16)-C(11)-C(12) | 118.40(19) |
| C(16)-C(11)-C(7)  | 119.71(18) |
| C(12)-C(11)-C(7)  | 121.88(18) |
| C(11)-C(12)-C(13) | 120.3(2)   |
| C(11)-C(12)-H(12) | 119.9      |
| C(13)-C(12)-H(12) | 119.9      |
| C(14)-C(13)-C(12) | 120.4(2)   |
| C(14)-C(13)-H(13) | 119.8      |
| C(12)-C(13)-H(13) | 119.8      |
| C(13)-C(14)-C(15) | 120.0(2)   |
| C(13)-C(14)-H(14) | 120.0      |
| C(15)-C(14)-H(14) | 120.0      |
| C(14)-C(15)-C(16) | 120.1(2)   |
| C(14)-C(15)-H(15) | 119.9      |
| C(16)-C(15)-H(15) | 119.9      |
| C(15)-C(16)-C(11) | 120.9(2)   |

---

|                   |            |
|-------------------|------------|
| C(15)-C(16)-H(16) | 119.6      |
| C(11)-C(16)-H(16) | 119.6      |
| C(22)-C(17)-C(18) | 118.03(19) |
| C(22)-C(17)-C(8)  | 122.24(19) |
| C(18)-C(17)-C(8)  | 119.73(19) |
| C(19)-C(18)-C(17) | 121.5(2)   |
| C(19)-C(18)-H(18) | 119.3      |
| C(17)-C(18)-H(18) | 119.3      |
| C(20)-C(19)-C(18) | 118.9(2)   |
| C(20)-C(19)-H(19) | 120.6      |
| C(18)-C(19)-H(19) | 120.6      |
| C(19)-C(20)-C(21) | 121.5(2)   |
| C(19)-C(20)-Br(1) | 119.90(17) |
| C(21)-C(20)-Br(1) | 118.55(17) |
| C(20)-C(21)-C(22) | 119.0(2)   |
| C(20)-C(21)-H(21) | 120.5      |
| C(22)-C(21)-H(21) | 120.5      |
| C(21)-C(22)-C(17) | 121.1(2)   |
| C(21)-C(22)-H(22) | 119.5      |
| C(17)-C(22)-H(22) | 119.5      |

---

Symmetry transformations used to generate equivalent atoms:

Table 4. Anisotropic displacement parameters ( $\text{\AA}^2 \times 10^3$ ) for mo\_d8v191122\_0m. The anisotropic

displacement factor exponent takes the form:  $-2\pi^2 [ h^2 a^{*2}U^{11} + \dots + 2 h k a^* b^* U^{12} ]$

|       | U <sup>11</sup> | U <sup>22</sup> | U <sup>33</sup> | U <sup>23</sup> | U <sup>13</sup> | U <sup>12</sup> |
|-------|-----------------|-----------------|-----------------|-----------------|-----------------|-----------------|
| Br(1) | 105(1)          | 79(1)           | 47(1)           | 18(1)           | 18(1)           | -5(1)           |
| F(1)  | 121(1)          | 28(1)           | 60(1)           | 0(1)            | 16(1)           | 12(1)           |
| O(1)  | 46(1)           | 54(1)           | 39(1)           | 3(1)            | -3(1)           | -2(1)           |
| O(2)  | 82(1)           | 55(1)           | 44(1)           | -6(1)           | -5(1)           | -27(1)          |
| N(1)  | 56(1)           | 50(1)           | 43(1)           | 5(1)            | 5(1)            | -17(1)          |
| N(2)  | 46(1)           | 41(1)           | 32(1)           | 3(1)            | 0(1)            | -7(1)           |
| N(3)  | 48(1)           | 31(1)           | 39(1)           | 1(1)            | 10(1)           | 1(1)            |
| C(1)  | 39(1)           | 39(1)           | 36(1)           | -4(1)           | 9(1)            | -2(1)           |
| C(2)  | 71(2)           | 56(2)           | 46(1)           | 14(1)           | 6(1)            | -6(1)           |
| C(3)  | 56(1)           | 55(1)           | 36(1)           | 9(1)            | 1(1)            | -5(1)           |
| C(4)  | 85(2)           | 64(2)           | 60(2)           | -6(1)           | 22(1)           | -34(1)          |
| C(5)  | 51(1)           | 36(1)           | 38(1)           | -6(1)           | 5(1)            | -6(1)           |
| C(6)  | 46(1)           | 30(1)           | 38(1)           | -2(1)           | 6(1)            | -7(1)           |
| C(7)  | 44(1)           | 30(1)           | 38(1)           | -1(1)           | 7(1)            | -3(1)           |
| C(8)  | 44(1)           | 30(1)           | 44(1)           | 2(1)            | 12(1)           | -1(1)           |
| C(9)  | 57(1)           | 26(1)           | 51(1)           | -1(1)           | 11(1)           | 1(1)            |
| C(10) | 59(1)           | 33(1)           | 42(1)           | -8(1)           | 10(1)           | -6(1)           |
| C(11) | 48(1)           | 31(1)           | 34(1)           | 1(1)            | 10(1)           | 1(1)            |
| C(12) | 48(1)           | 44(1)           | 49(1)           | -4(1)           | 1(1)            | 0(1)            |
| C(13) | 54(1)           | 52(1)           | 60(1)           | 4(1)            | 4(1)            | 16(1)           |
| C(14) | 72(2)           | 36(1)           | 70(2)           | 2(1)            | 18(1)           | 14(1)           |
| C(15) | 66(2)           | 38(1)           | 63(2)           | -13(1)          | 7(1)            | 1(1)            |
| C(16) | 54(1)           | 37(1)           | 42(1)           | -4(1)           | 2(1)            | 3(1)            |
| C(17) | 47(1)           | 31(1)           | 44(1)           | 4(1)            | 12(1)           | -2(1)           |
| C(18) | 57(1)           | 42(1)           | 52(1)           | 4(1)            | 16(1)           | 10(1)           |
| C(19) | 64(2)           | 52(1)           | 50(1)           | 0(1)            | 23(1)           | 1(1)            |
| C(20) | 58(1)           | 43(1)           | 42(1)           | 7(1)            | 11(1)           | -10(1)          |
| C(21) | 56(1)           | 41(1)           | 53(1)           | 11(1)           | 11(1)           | 5(1)            |
| C(22) | 54(1)           | 42(1)           | 50(1)           | 5(1)            | 18(1)           | 6(1)            |



Table 5. Hydrogen coordinates ( $\times 10^4$ ) and isotropic displacement parameters ( $\text{\AA}^2 \times 10^{-3}$ ) for mo\_d8v191122\_0m.

|       | x     | y    | z     | U(eq) |
|-------|-------|------|-------|-------|
| H(2A) | 7292  | 7828 | -1622 | 71    |
| H(2B) | 6217  | 7997 | -732  | 71    |
| H(3A) | 5090  | 7034 | -1378 | 61    |
| H(3B) | 6606  | 6770 | -1728 | 61    |
| H(4A) | 8971  | 8390 | 1062  | 103   |
| H(4B) | 9686  | 8291 | -68   | 103   |
| H(4C) | 10320 | 7883 | 1134  | 103   |
| H(10) | 6767  | 5009 | 1168  | 55    |
| H(12) | 3899  | 6916 | 1291  | 59    |
| H(13) | 3263  | 8013 | 1165  | 69    |
| H(14) | 4858  | 8753 | 2417  | 71    |
| H(15) | 7093  | 8407 | 3812  | 69    |
| H(16) | 7717  | 7315 | 3979  | 55    |
| H(18) | 6023  | 5739 | 5903  | 60    |
| H(19) | 6515  | 5342 | 7881  | 65    |
| H(21) | 9639  | 4091 | 7143  | 61    |
| H(22) | 9100  | 4474 | 5144  | 57    |

Table 6. Torsion angles [°] for mo\_d8v191122\_0m.

---

|                       |             |
|-----------------------|-------------|
| C(4)-N(1)-C(1)-O(1)   | -8.0(4)     |
| C(2)-N(1)-C(1)-O(1)   | -172.7(2)   |
| C(4)-N(1)-C(1)-N(2)   | 173.2(2)    |
| C(2)-N(1)-C(1)-N(2)   | 8.4(3)      |
| C(5)-N(2)-C(1)-O(1)   | 5.8(4)      |
| C(3)-N(2)-C(1)-O(1)   | -169.9(2)   |
| C(5)-N(2)-C(1)-N(1)   | -175.3(2)   |
| C(3)-N(2)-C(1)-N(1)   | 9.0(2)      |
| C(1)-N(1)-C(2)-C(3)   | -21.4(3)    |
| C(4)-N(1)-C(2)-C(3)   | 173.9(2)    |
| C(5)-N(2)-C(3)-C(2)   | 162.5(2)    |
| C(1)-N(2)-C(3)-C(2)   | -21.3(2)    |
| N(1)-C(2)-C(3)-N(2)   | 24.2(2)     |
| C(1)-N(2)-C(5)-O(2)   | -167.4(2)   |
| C(3)-N(2)-C(5)-O(2)   | 8.0(3)      |
| C(1)-N(2)-C(5)-C(6)   | 13.1(3)     |
| C(3)-N(2)-C(5)-C(6)   | -171.6(2)   |
| O(2)-C(5)-C(6)-C(10)  | 50.5(3)     |
| N(2)-C(5)-C(6)-C(10)  | -129.9(2)   |
| O(2)-C(5)-C(6)-C(7)   | -125.0(2)   |
| N(2)-C(5)-C(6)-C(7)   | 54.6(3)     |
| C(8)-N(3)-C(7)-C(6)   | -1.4(3)     |
| C(8)-N(3)-C(7)-C(11)  | 178.32(18)  |
| C(10)-C(6)-C(7)-N(3)  | 4.1(3)      |
| C(5)-C(6)-C(7)-N(3)   | 179.50(19)  |
| C(10)-C(6)-C(7)-C(11) | -175.61(19) |
| C(5)-C(6)-C(7)-C(11)  | -0.2(3)     |
| C(7)-N(3)-C(8)-C(9)   | -1.7(3)     |
| C(7)-N(3)-C(8)-C(17)  | -179.53(18) |
| N(3)-C(8)-C(9)-F(1)   | -175.67(19) |
| C(17)-C(8)-C(9)-F(1)  | 2.0(3)      |
| N(3)-C(8)-C(9)-C(10)  | 2.2(3)      |
| C(17)-C(8)-C(9)-C(10) | 179.9(2)    |
| F(1)-C(9)-C(10)-C(6)  | 178.4(2)    |
| C(8)-C(9)-C(10)-C(6)  | 0.5(3)      |
| C(7)-C(6)-C(10)-C(9)  | -3.5(3)     |

---

|                         |             |
|-------------------------|-------------|
| C(5)-C(6)-C(10)-C(9)    | -179.3(2)   |
| N(3)-C(7)-C(11)-C(16)   | 50.7(3)     |
| C(6)-C(7)-C(11)-C(16)   | -129.5(2)   |
| N(3)-C(7)-C(11)-C(12)   | -130.6(2)   |
| C(6)-C(7)-C(11)-C(12)   | 49.2(3)     |
| C(16)-C(11)-C(12)-C(13) | 0.5(3)      |
| C(7)-C(11)-C(12)-C(13)  | -178.1(2)   |
| C(11)-C(12)-C(13)-C(14) | 0.2(4)      |
| C(12)-C(13)-C(14)-C(15) | -0.3(4)     |
| C(13)-C(14)-C(15)-C(16) | -0.4(4)     |
| C(14)-C(15)-C(16)-C(11) | 1.2(4)      |
| C(12)-C(11)-C(16)-C(15) | -1.3(3)     |
| C(7)-C(11)-C(16)-C(15)  | 177.4(2)    |
| N(3)-C(8)-C(17)-C(22)   | -148.5(2)   |
| C(9)-C(8)-C(17)-C(22)   | 33.8(3)     |
| N(3)-C(8)-C(17)-C(18)   | 31.7(3)     |
| C(9)-C(8)-C(17)-C(18)   | -146.0(2)   |
| C(22)-C(17)-C(18)-C(19) | -0.9(3)     |
| C(8)-C(17)-C(18)-C(19)  | 179.0(2)    |
| C(17)-C(18)-C(19)-C(20) | 0.7(4)      |
| C(18)-C(19)-C(20)-C(21) | 0.3(4)      |
| C(18)-C(19)-C(20)-Br(1) | -178.26(18) |
| C(19)-C(20)-C(21)-C(22) | -1.0(4)     |
| Br(1)-C(20)-C(21)-C(22) | 177.51(17)  |
| C(20)-C(21)-C(22)-C(17) | 0.9(4)      |
| C(18)-C(17)-C(22)-C(21) | 0.1(3)      |
| C(8)-C(17)-C(22)-C(21)  | -179.8(2)   |

---

Symmetry transformations used to generate equivalent atoms:

Table 7. Hydrogen bonds for mo\_d8v191122\_0m [Å and °].

| D-H...A              | d(D-H) | d(H...A) | d(D...A) | <(DHA) |
|----------------------|--------|----------|----------|--------|
| C(21)-H(21)...O(1)#1 | 0.93   | 2.49     | 3.393(3) | 162.5  |
| C(10)-H(10)...O(2)#2 | 0.93   | 2.48     | 3.120(3) | 126.3  |
| C(21)-H(21)...O(1)#1 | 0.93   | 2.49     | 3.393(3) | 162.5  |
| C(10)-H(10)...O(2)#2 | 0.93   | 2.48     | 3.120(3) | 126.3  |
| C(4)-H(4A)...F(1)#3  | 0.96   | 2.64     | 3.585(3) | 167.6  |
| C(10)-H(10)...O(2)#2 | 0.93   | 2.48     | 3.120(3) | 126.3  |
| C(21)-H(21)...O(1)#1 | 0.93   | 2.49     | 3.393(3) | 162.5  |

Symmetry transformations used to generate equivalent atoms:

#1 -x+2,-y+1,-z+1    #2 -x+1,-y+1,-z    #3 -x+3/2,y+1/2,-z+1/2

## 6. Reference

- (1) Y. Wu, L. Deng, *J. Am. Chem. Soc.* 2012, **134**, 14334–14337.
- (2) M. Li, V. Carreras, A. Jalba, T. Ollevier, *Org. Lett.* 2018, **20**, 995–998.
- (3) A. Welle, J. Petrognet, B. Tinat, J. Wouters, O. Riant, *Chem. Eur. J.* 2010, **16**, 10980–10983.
- (4) P. Stabile, A. Lamonica, A. Ribecai, D. Castoldi, G. Guercio, O. Curcuruto, *Tetrahedron Letters*. 2010, **51**, 3232–3235.

## 7. $^1\text{H}$ , $^{13}\text{C}$ and $^{19}\text{F}$ NMR spectra

### 2-Acryloyl-2-azaspiro[4.5]decan-1-one (2q)

[ $^1\text{H}$ \_NMR\_400 MHz\_( $\text{CDCl}_3$ : 7.26 ppm)]

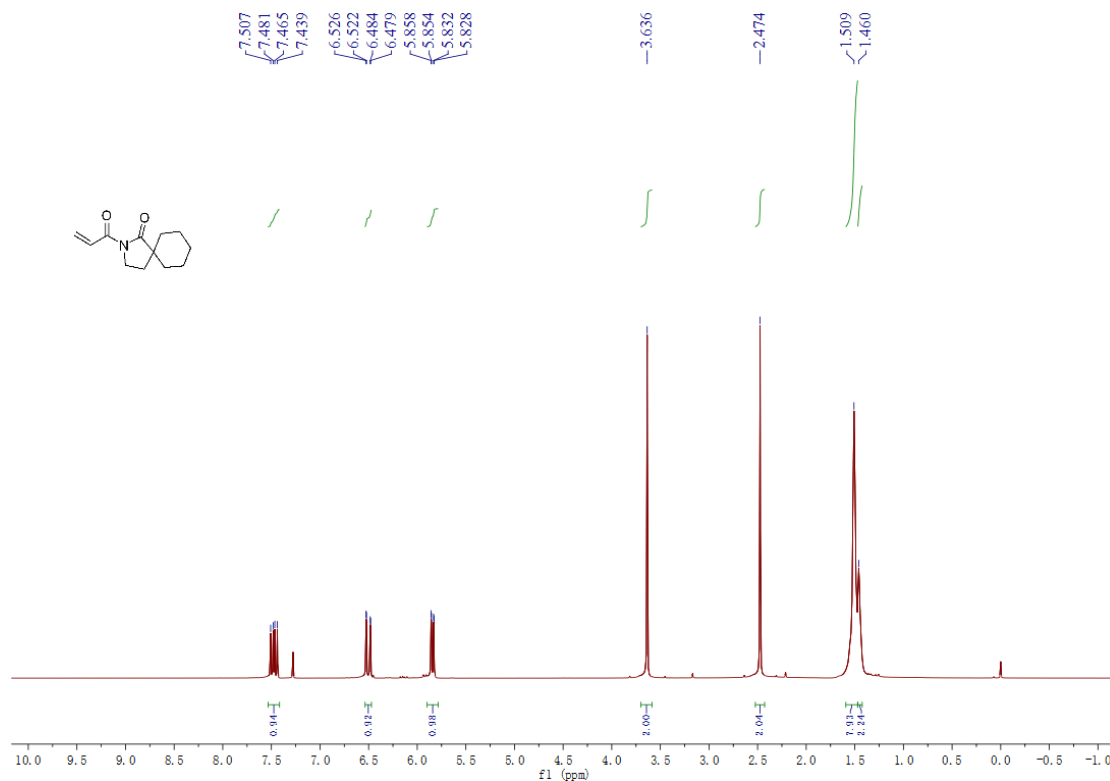

[ $^{13}\text{C}$ \_NMR\_100 MHz\_( $\text{CDCl}_3$ : 77.00 ppm)]

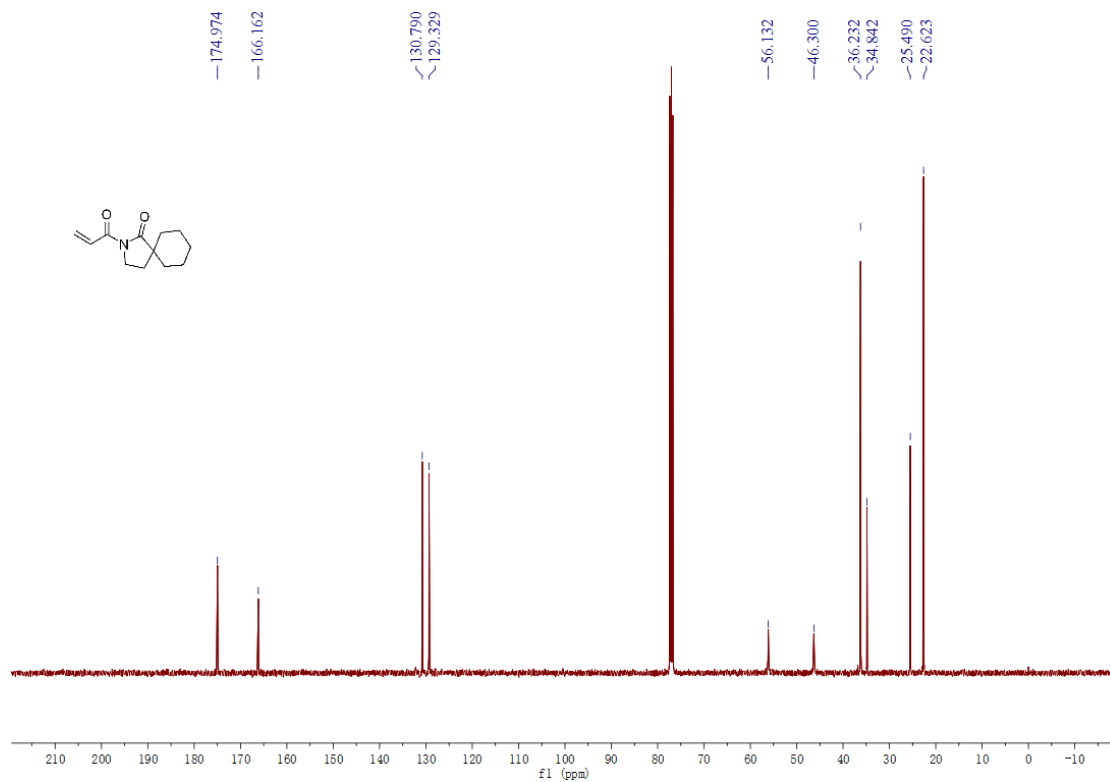

**1-Acryloyl-3-(naphthalen-2-yl)imidazolidin-2-one (2t)**[<sup>1</sup>H\_NMR\_400 MHz\_(CDCl<sub>3</sub>: 7.26 ppm)]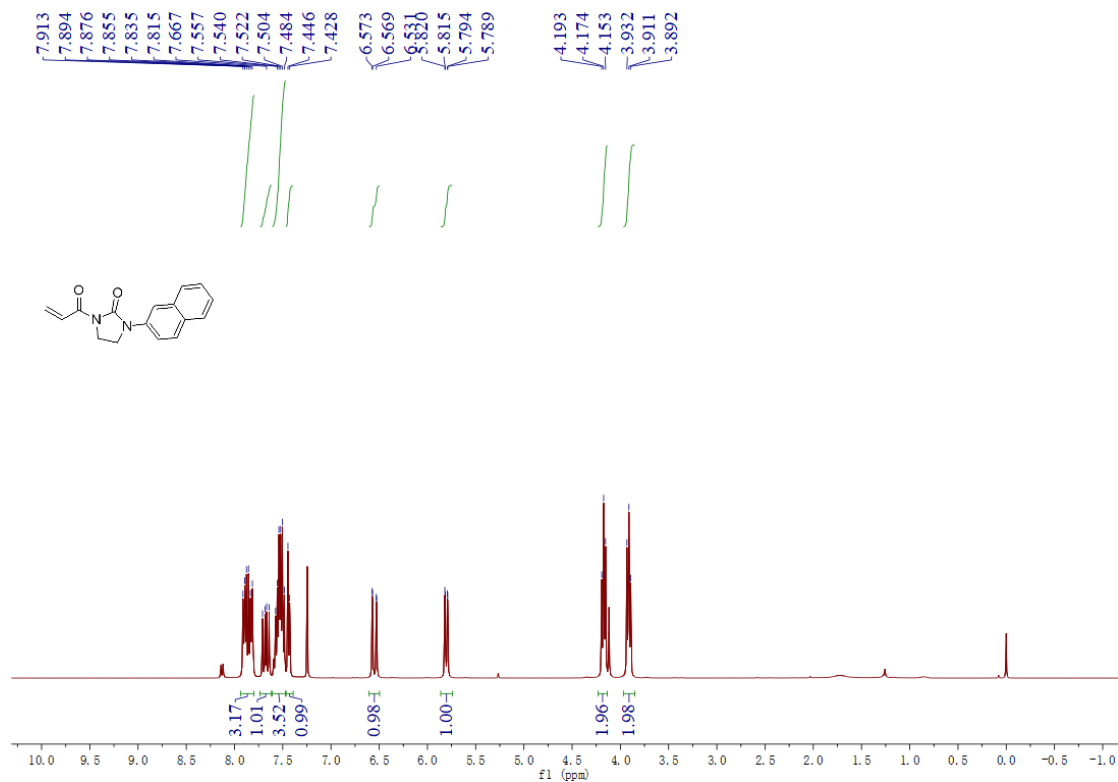[<sup>13</sup>C\_NMR\_100 MHz\_(CDCl<sub>3</sub>: 77.00 ppm)]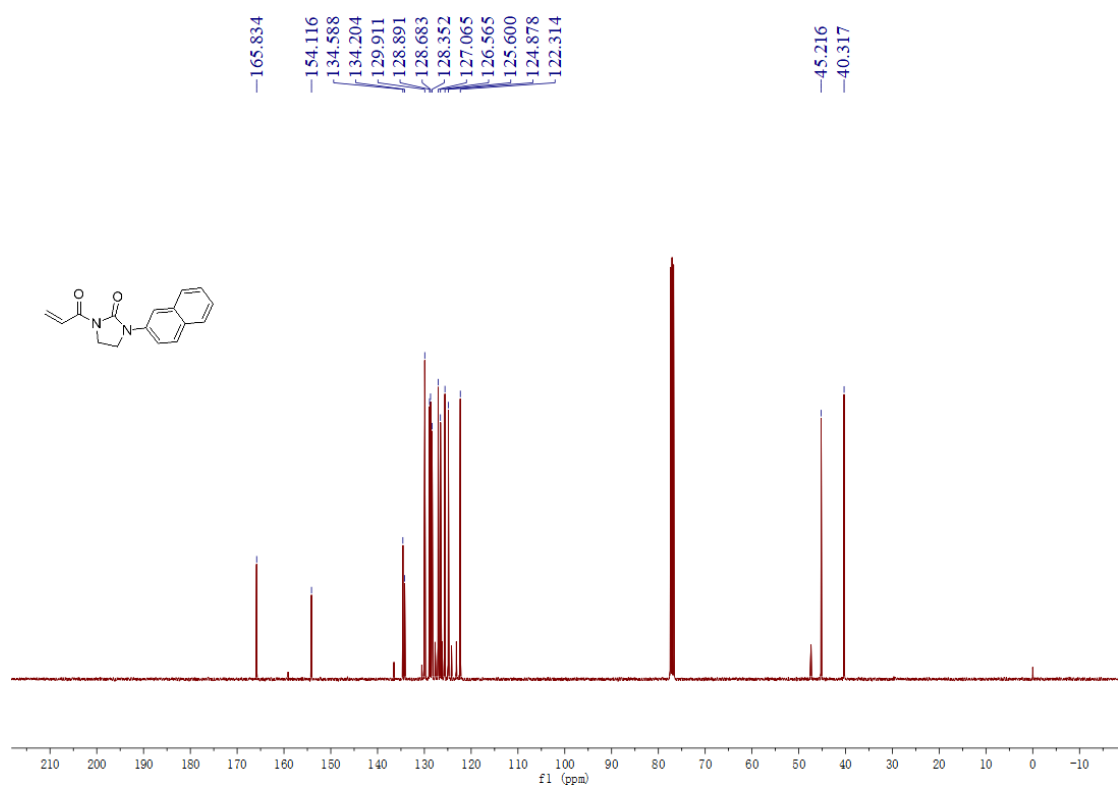

**Acryloyl-3-(4-(tert-butyl)phenyl)imidazolidin-2-one (2v)**[<sup>1</sup>H\_NMR\_400 MHz\_(CDCl<sub>3</sub>: 7.26 ppm)]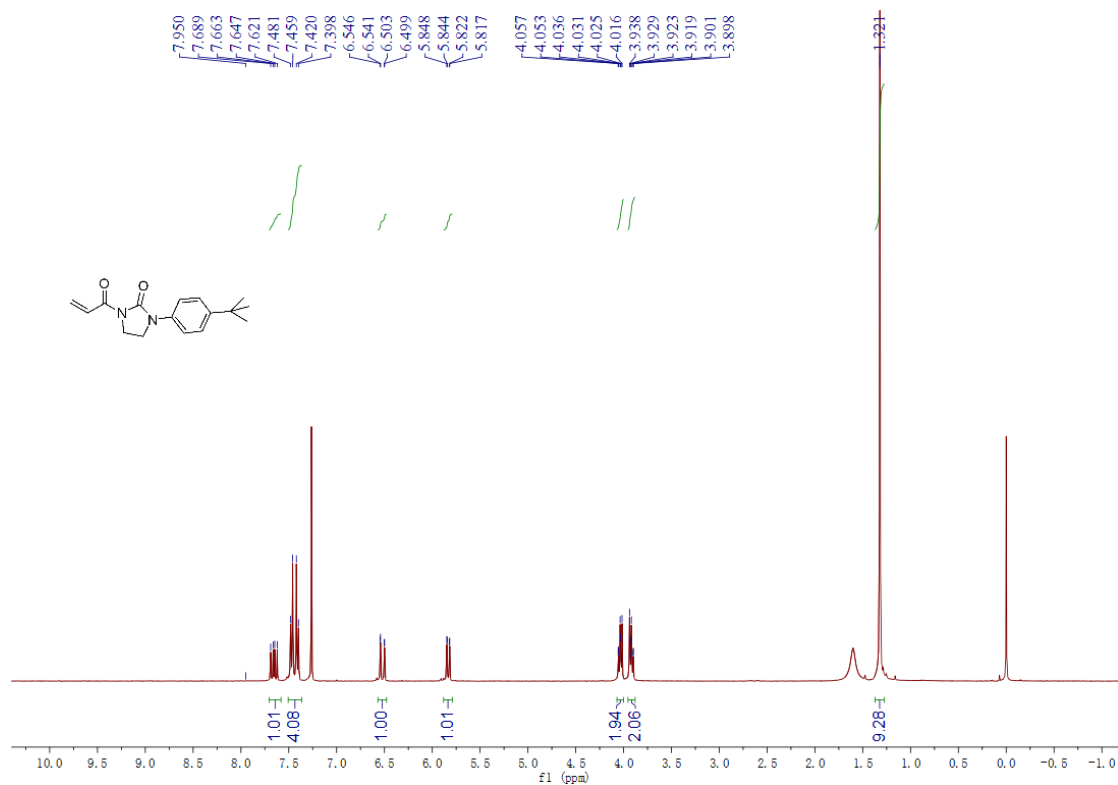[<sup>13</sup>C\_NMR\_100 MHz\_(CDCl<sub>3</sub>: 77.00 ppm)]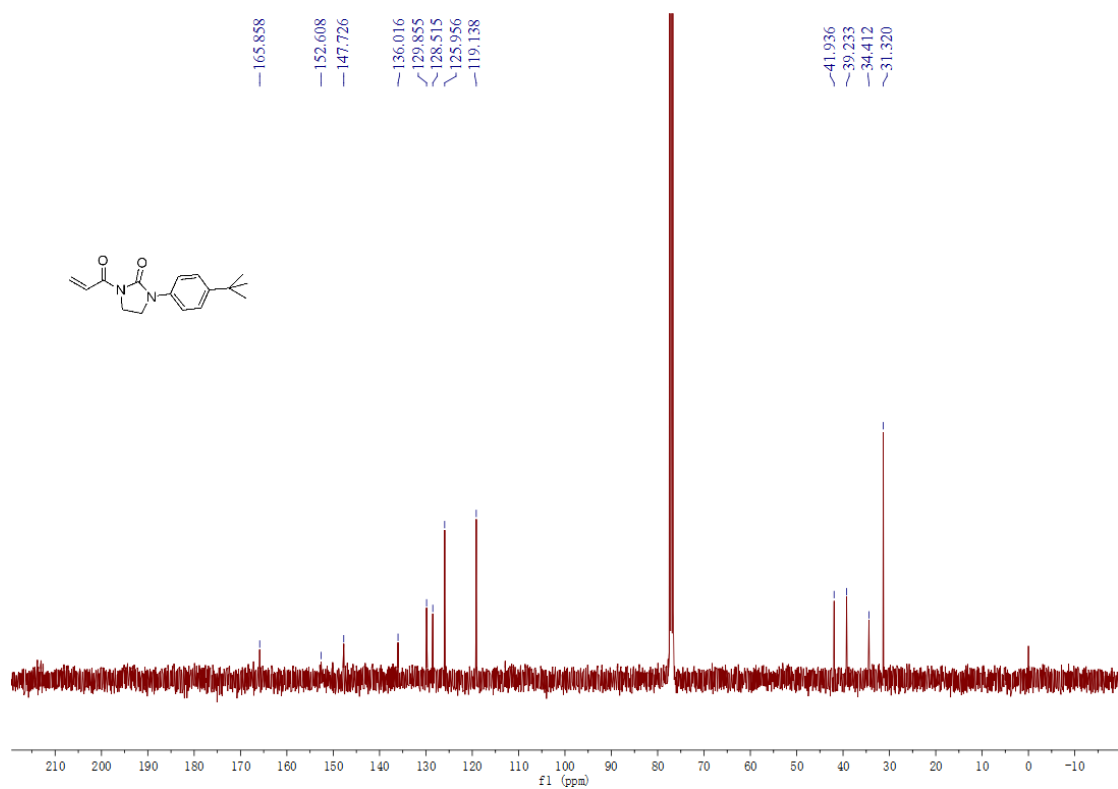

**Acryloyl-3-(3-chlorophenyl)imidazolidin-2-one (2w)**[<sup>1</sup>H\_NMR\_400 MHz\_(CDCl<sub>3</sub>: 7.26 ppm)]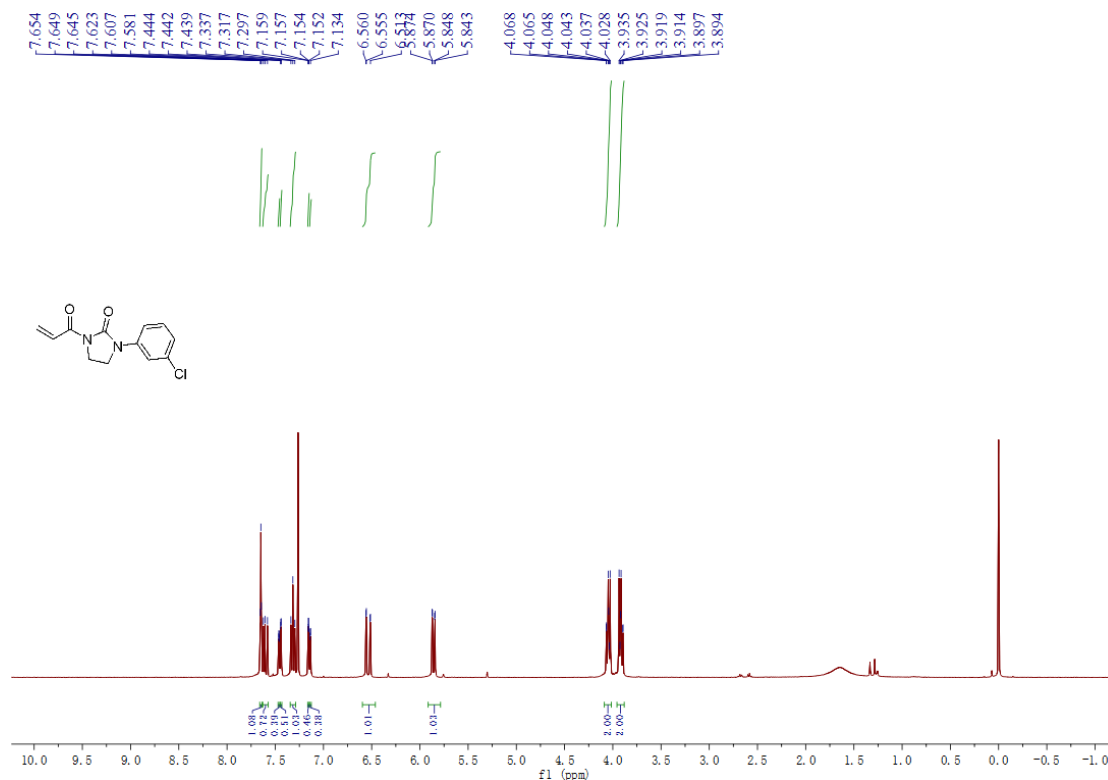[<sup>13</sup>C\_NMR\_100 MHz\_(CDCl<sub>3</sub>: 77.00 ppm)]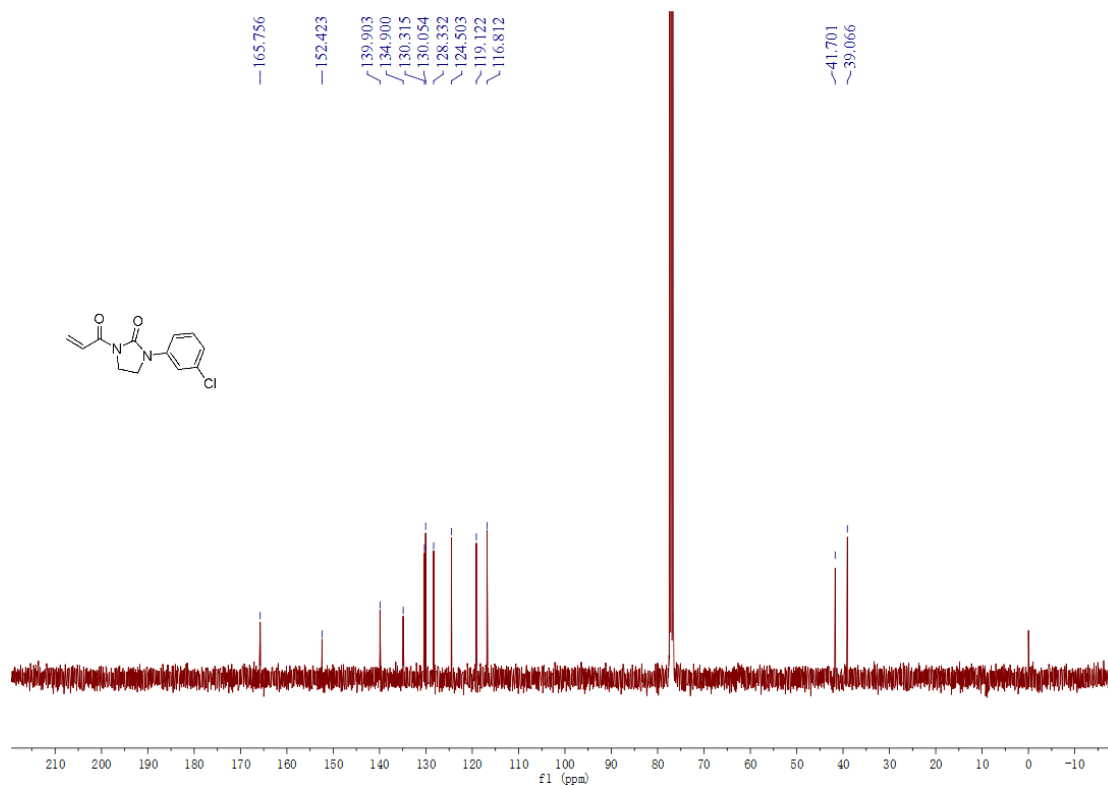



**Acryloyl-3-(3-methoxyphenyl)imidazolidin-2-one (2x)**[<sup>1</sup>H\_NMR\_400 MHz\_(CDCl<sub>3</sub>: 7.26 ppm)]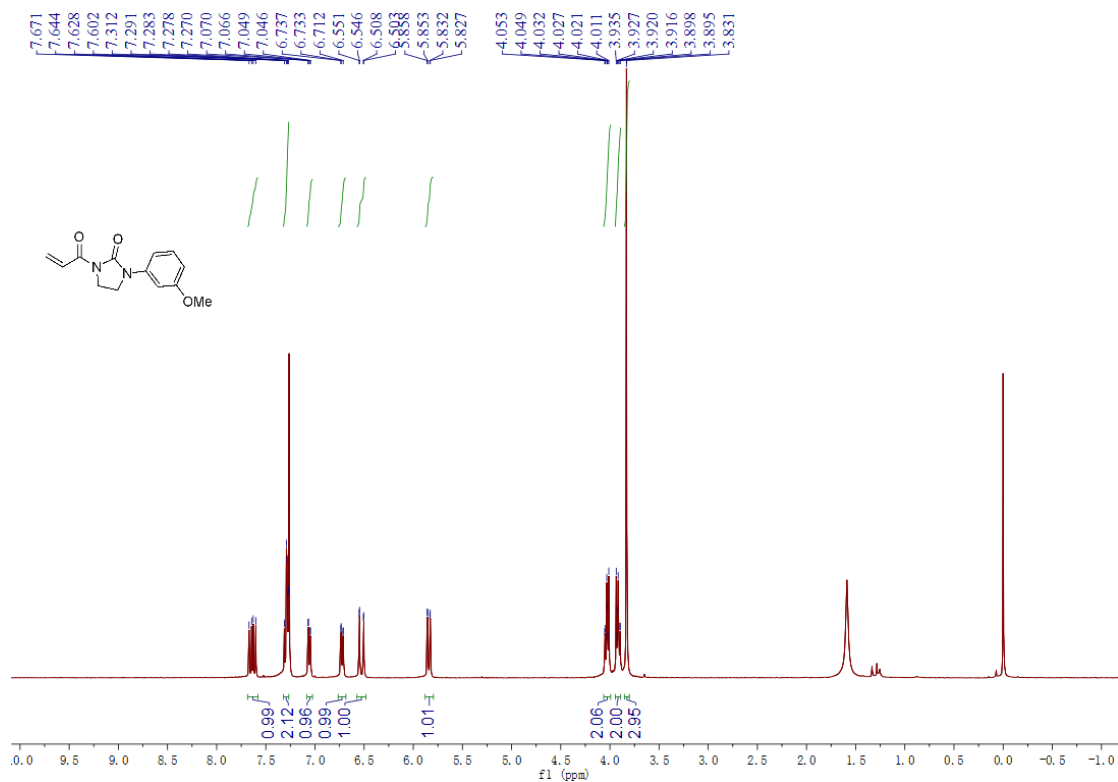[<sup>13</sup>C\_NMR\_100 MHz\_(CDCl<sub>3</sub>: 77.00 ppm)]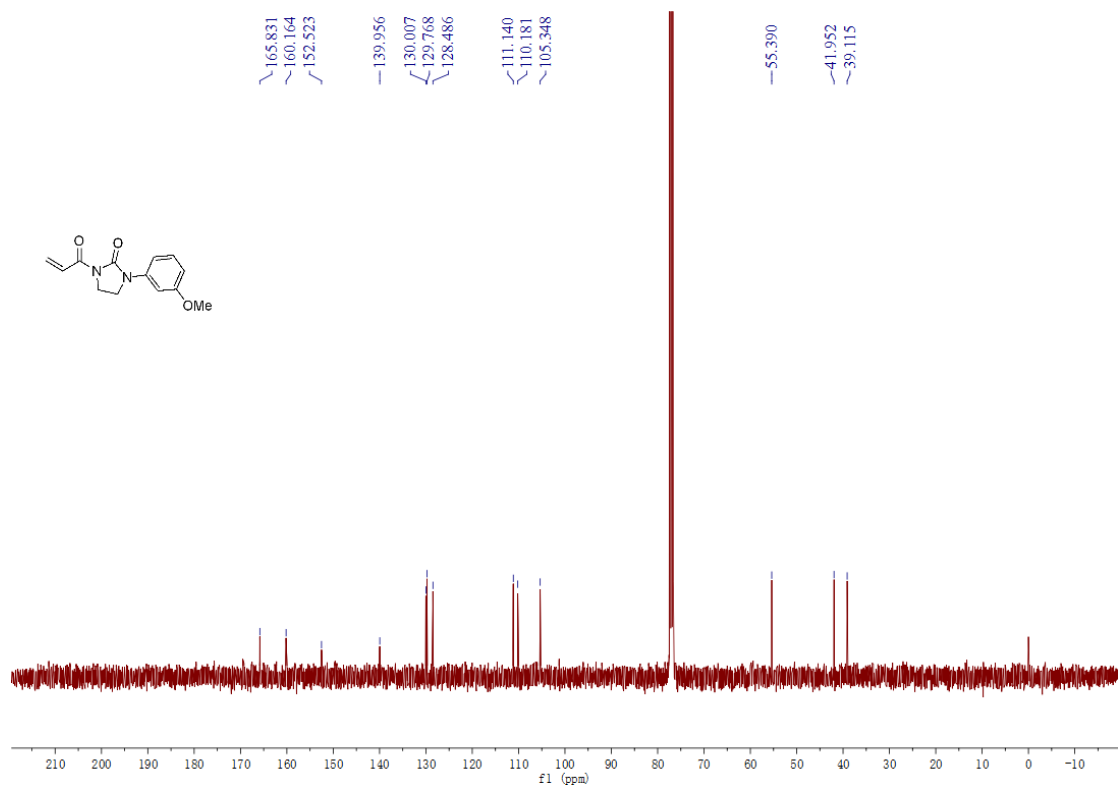

**3-(5-Fluoro-2,6-diphenylnicotinoyl)oxazolidin-2-one (3a)** $^1\text{H-NMR}$ \_400 MHz\_( $\text{CDCl}_3$ : 7.26 ppm)]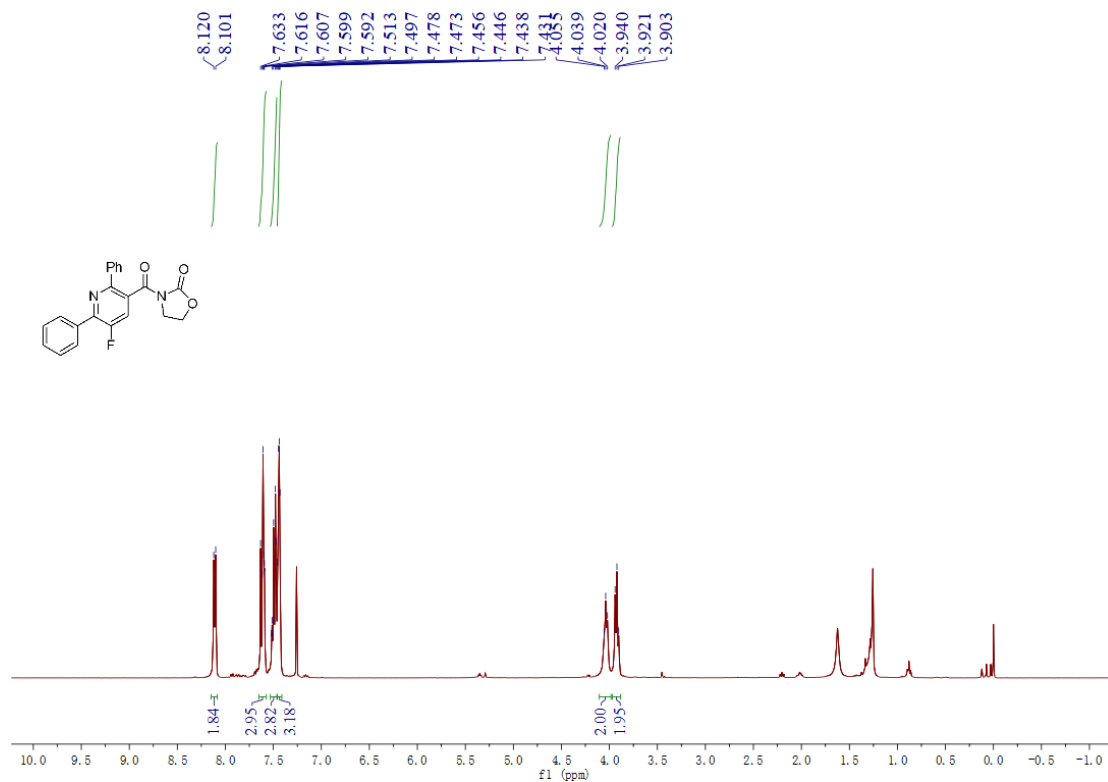 $^{13}\text{C-NMR}$ \_100 MHz\_( $\text{CDCl}_3$ : 77.00 ppm)]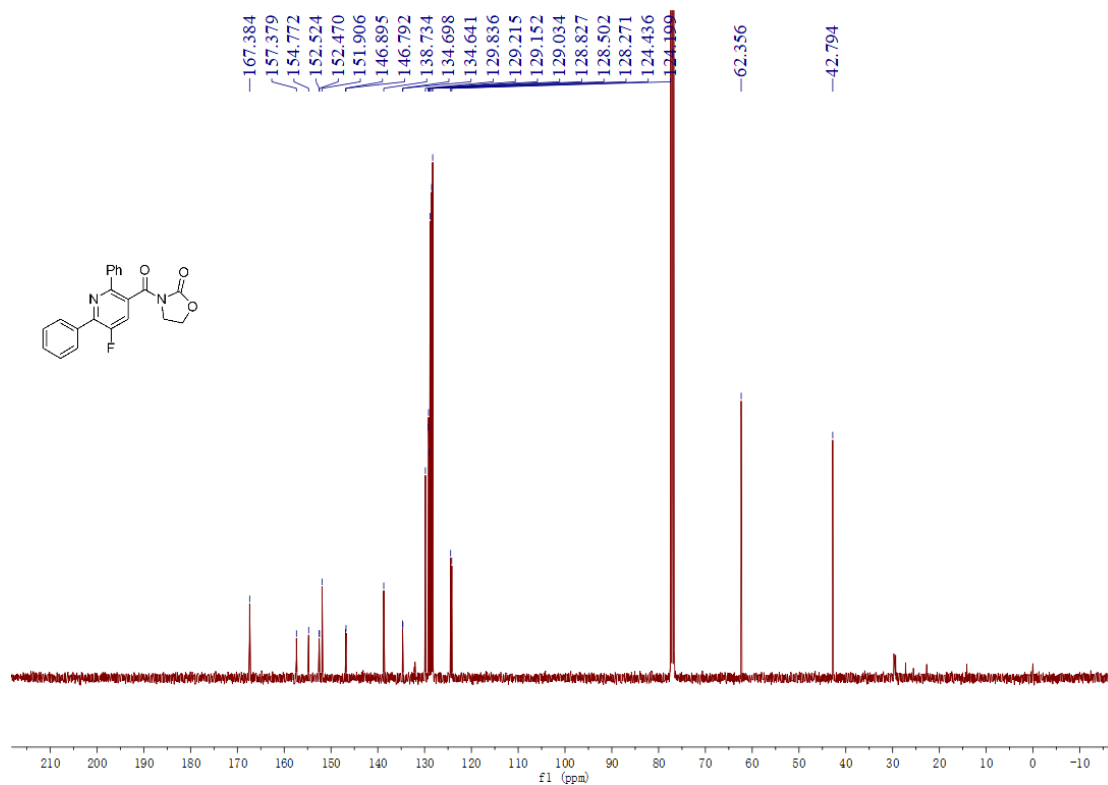

[<sup>19</sup>F\_NMR\_375 MHz]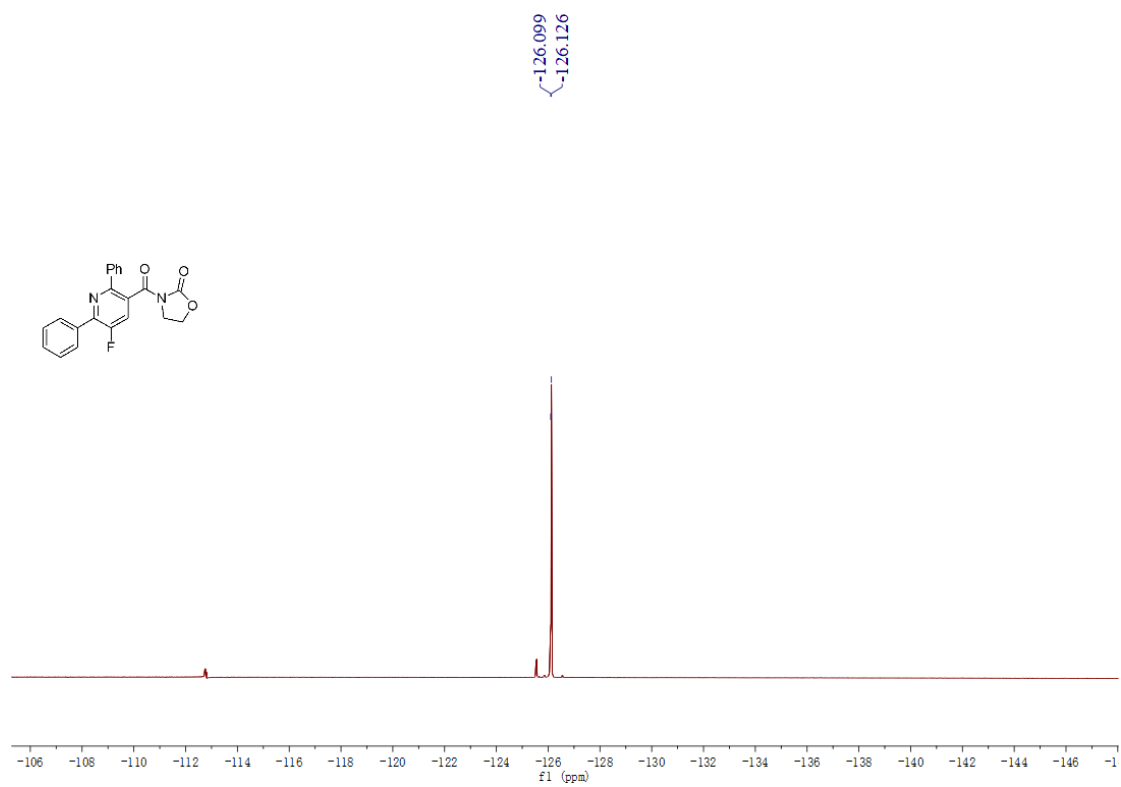

**3-(6-(4-Bromophenyl)-5-fluoro-2-phenylnicotinoyl)oxazolidin-2-one (3b)**[<sup>1</sup>H\_NMR\_400 MHz\_(CDCl<sub>3</sub>: 7.26 ppm)]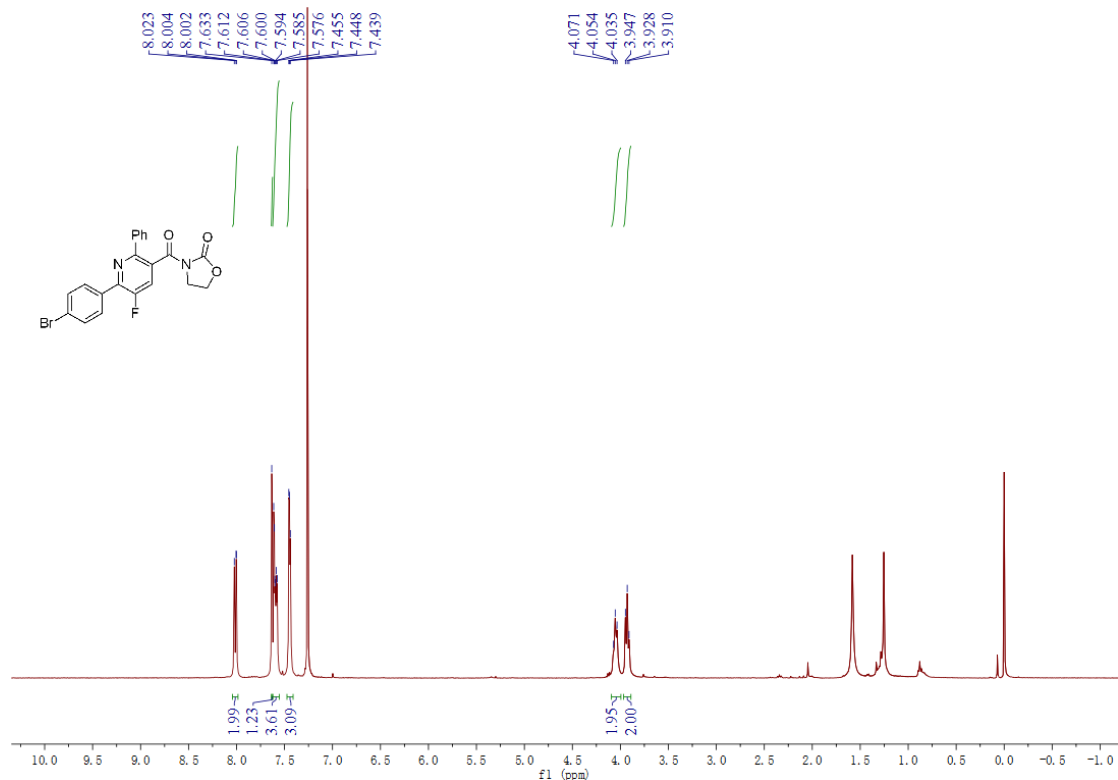[<sup>13</sup>C\_NMR\_150 MHz\_(CDCl<sub>3</sub>: 77.00 ppm)]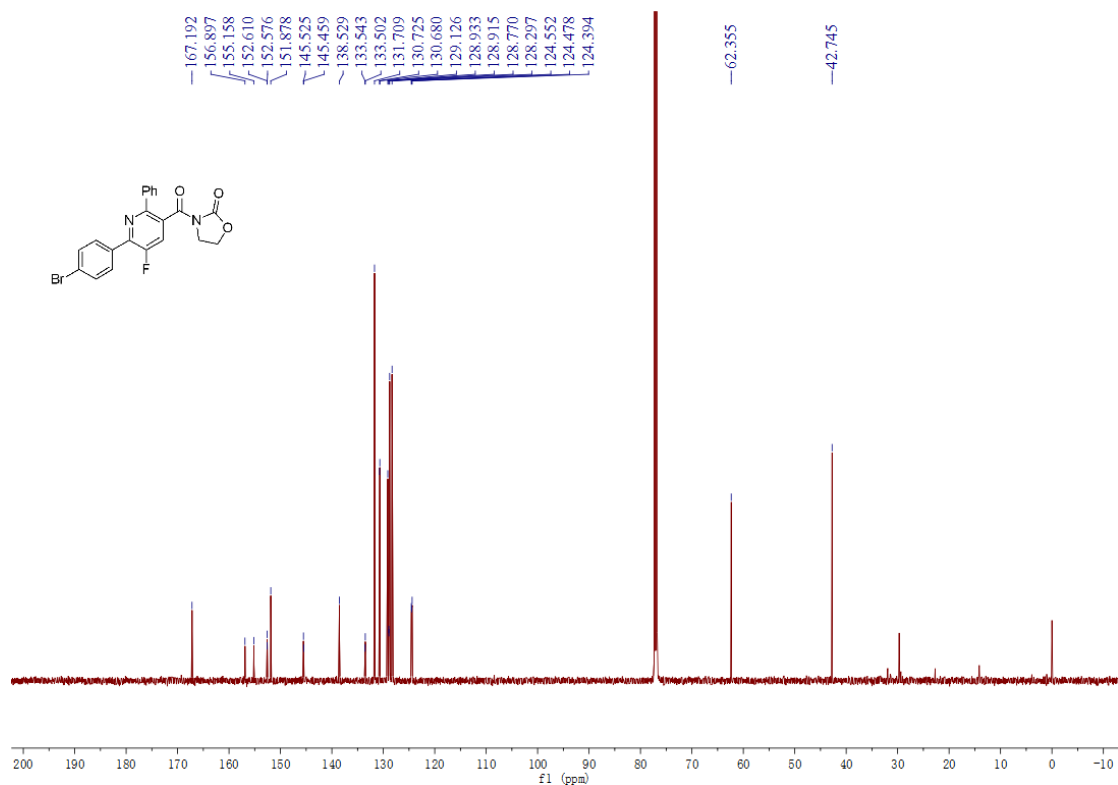

[ $^{19}\text{F}$ \_NMR\_565 MHz]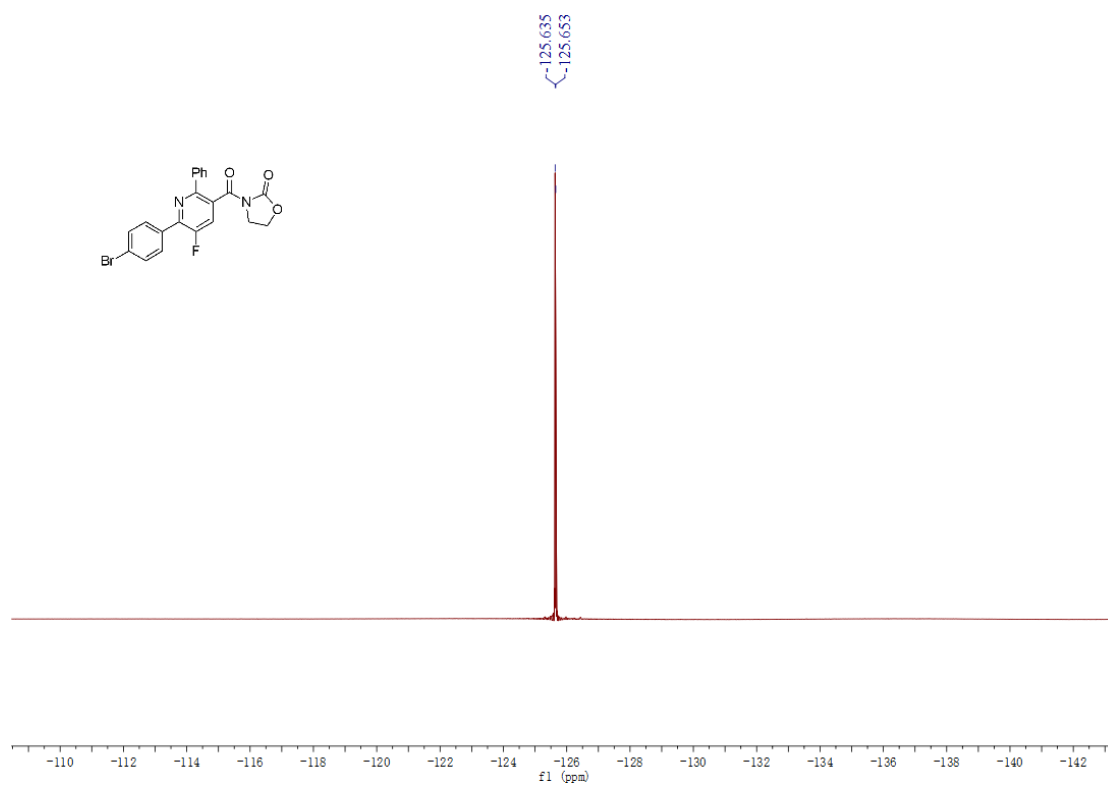

**3-(6-(3-Chlorophenyl)-5-fluoro-2-phenylnicotinoyl)oxazolidin-2-one (3c)**[ $^1\text{H-NMR}$ \_400 MHz\_( $\text{CDCl}_3$ : 7.26 ppm)]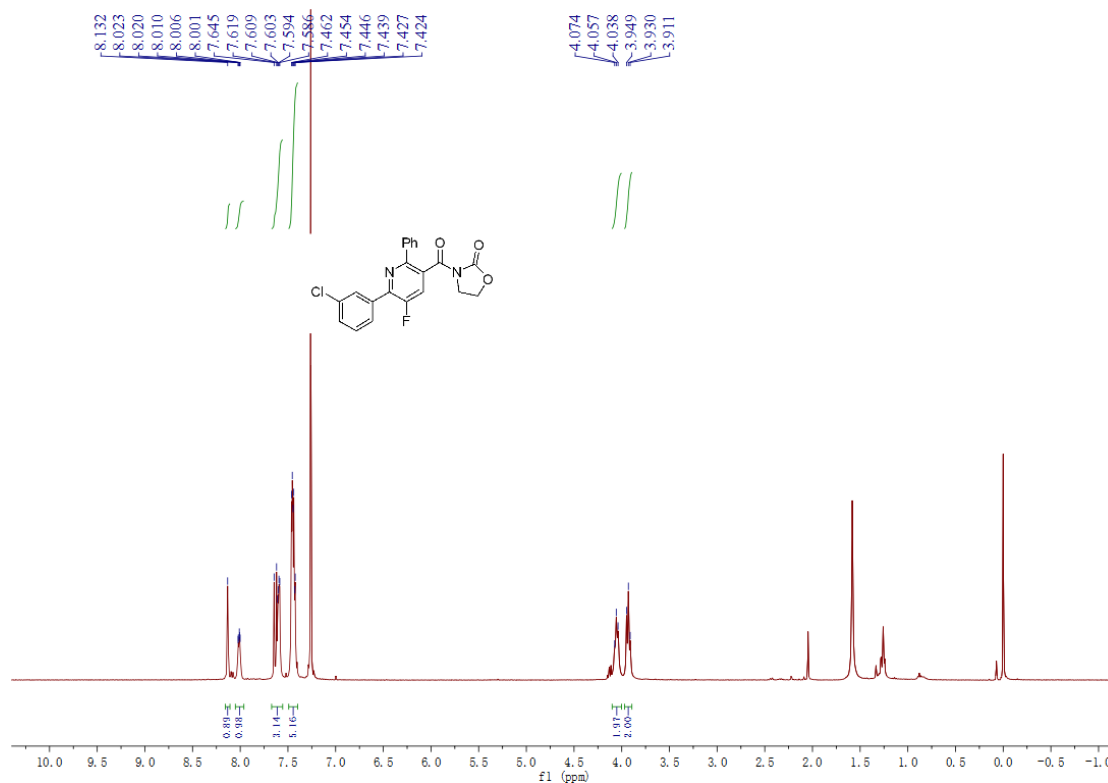[ $^{13}\text{C-NMR}$ \_150 MHz\_( $\text{CDCl}_3$ : 77.00 ppm)]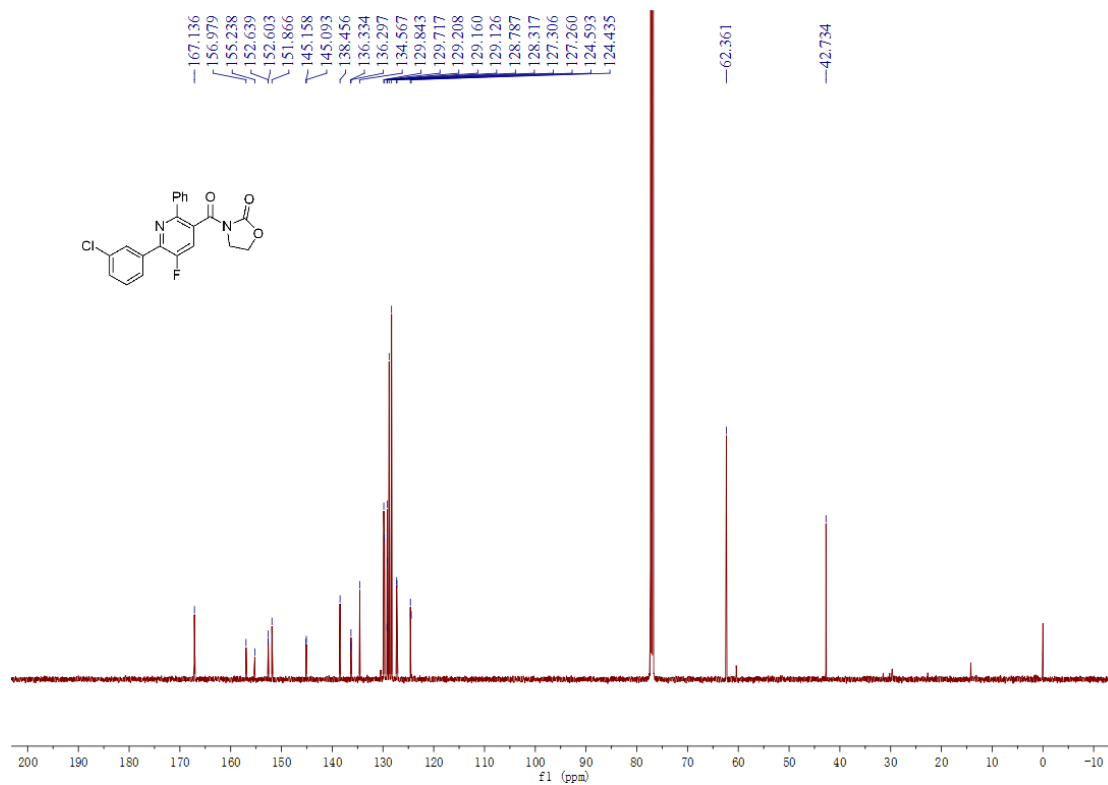

[<sup>19</sup>F\_NMR\_565 MHz]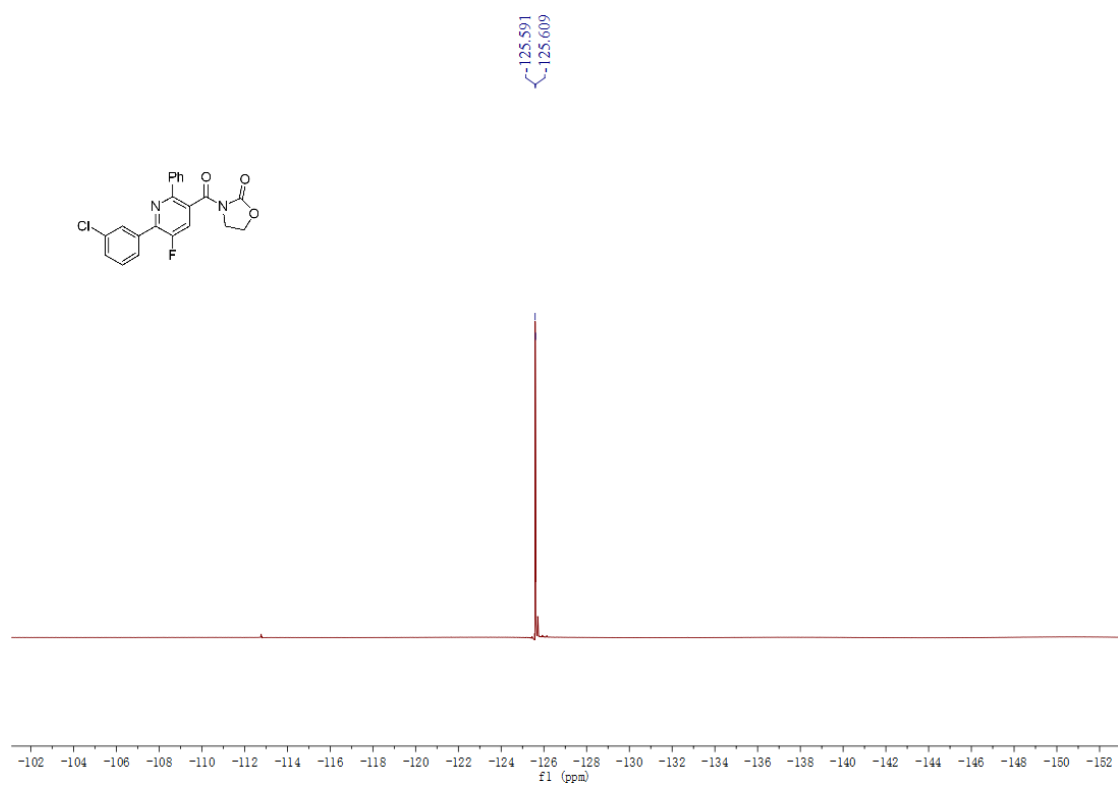

**3-(6-(3-Bromophenyl)-5-fluoro-2-phenylnicotinoyl)oxazolidin-2-one (3d)**[<sup>1</sup>H\_NMR\_600 MHz\_(CDCl<sub>3</sub>: 7.26 ppm)]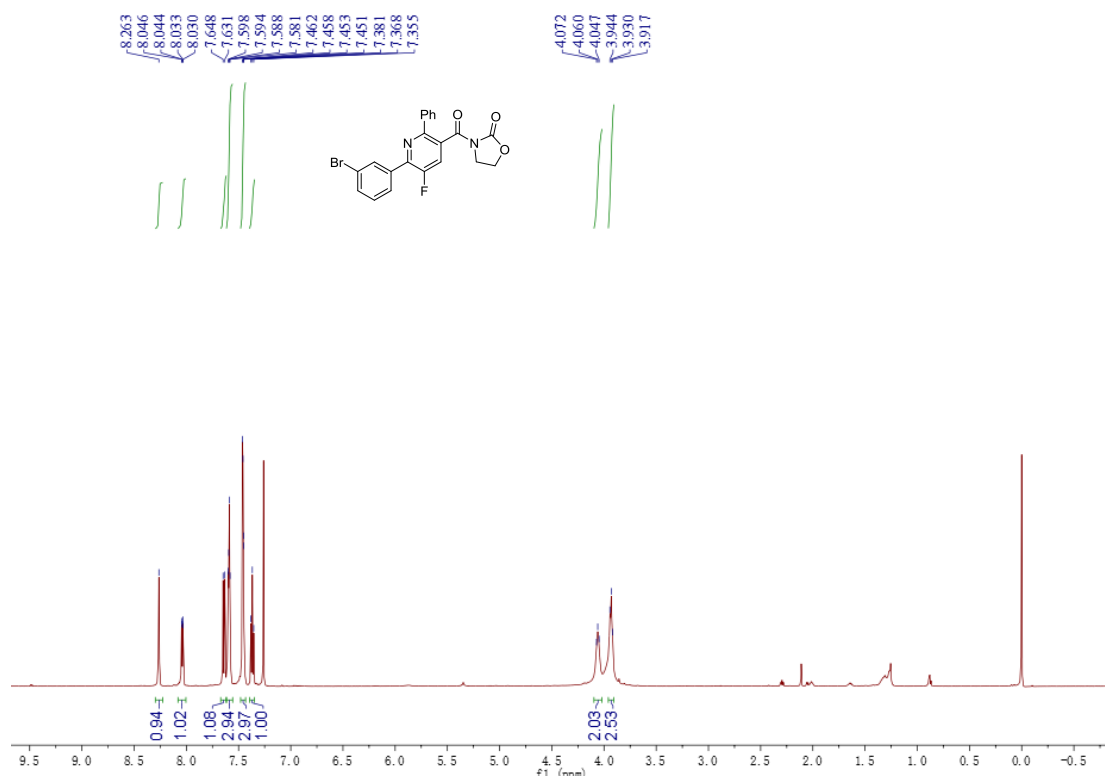[<sup>13</sup>C\_NMR\_150 MHz\_(CDCl<sub>3</sub>: 77.00 ppm)]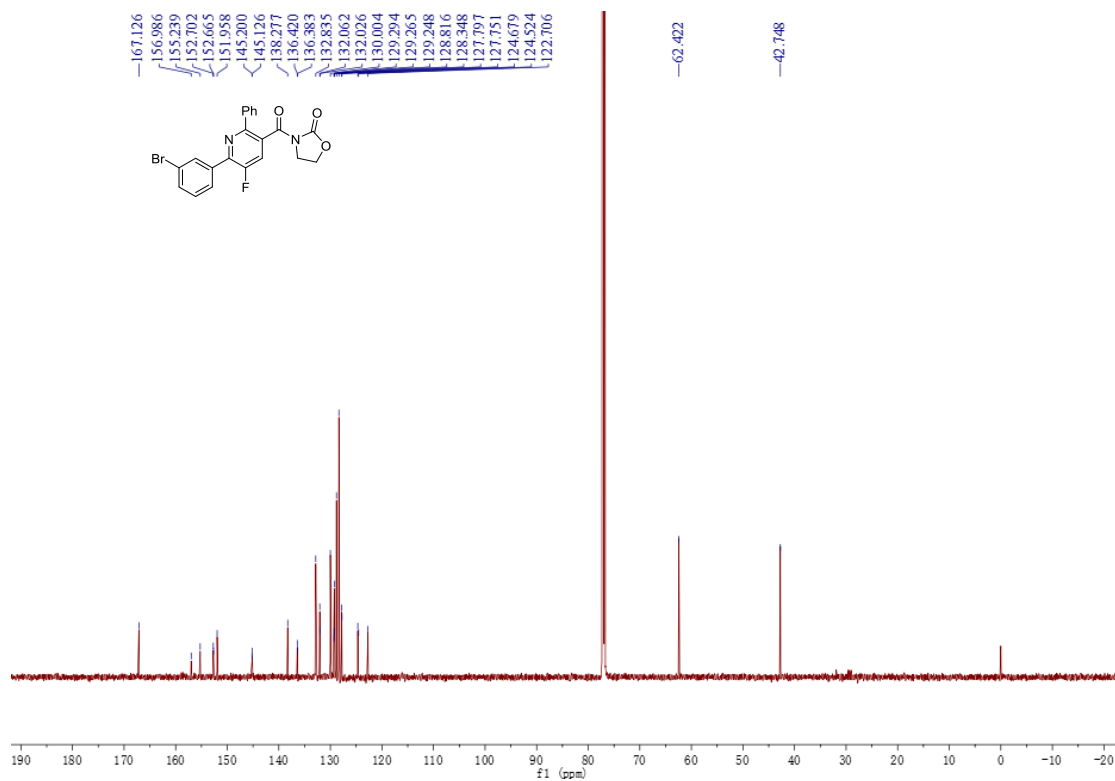



$[^{19}\text{F\_NMR\_565 MHz}]$ 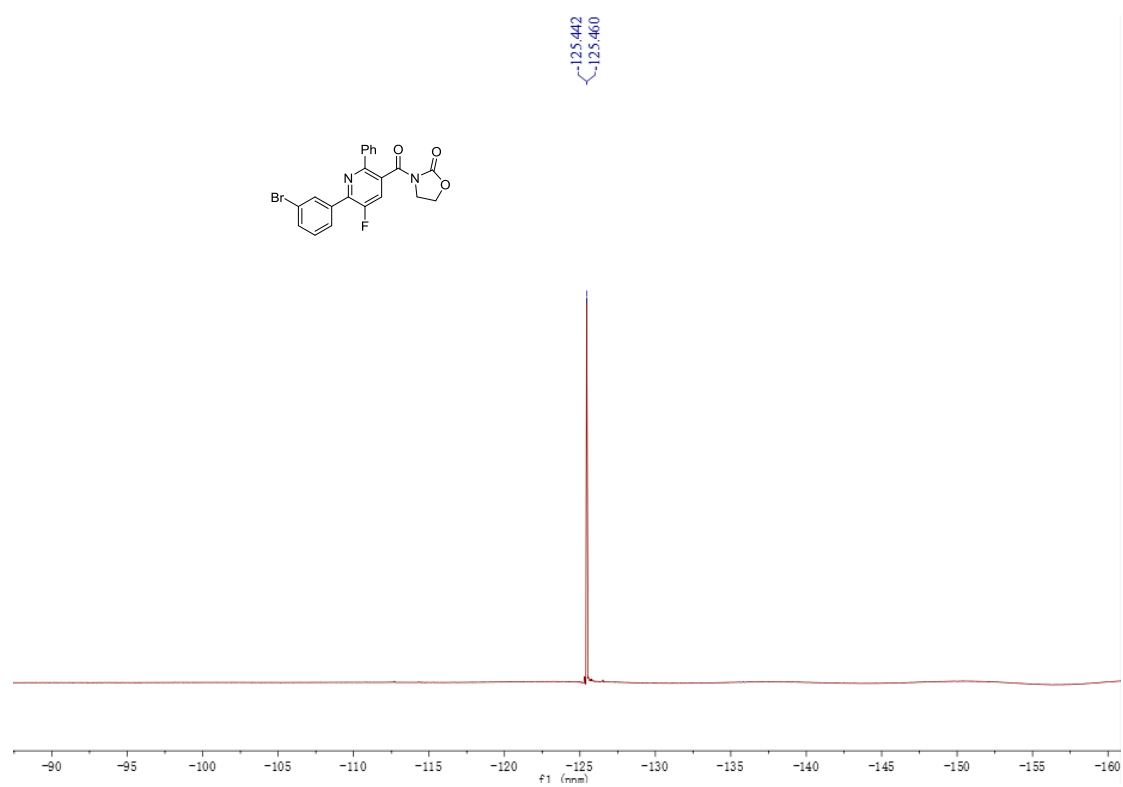

**3-(5-Fluoro-2-phenyl-6-(p-tolyl)nicotinoyl)oxazolidin-2-one (3e)**[ $^1\text{H-NMR}$ \_400 MHz\_( $\text{CDCl}_3$ : 7.26 ppm)]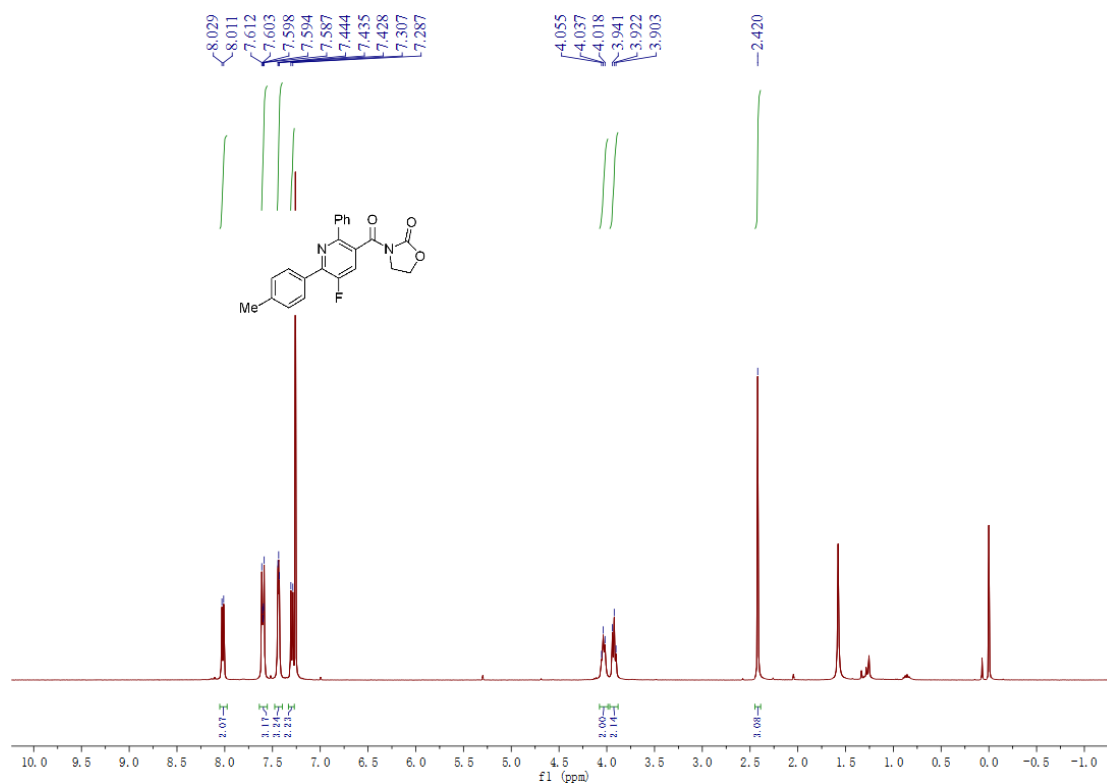[ $^{13}\text{C-NMR}$ \_150 MHz\_( $\text{CDCl}_3$ : 77.00 ppm)]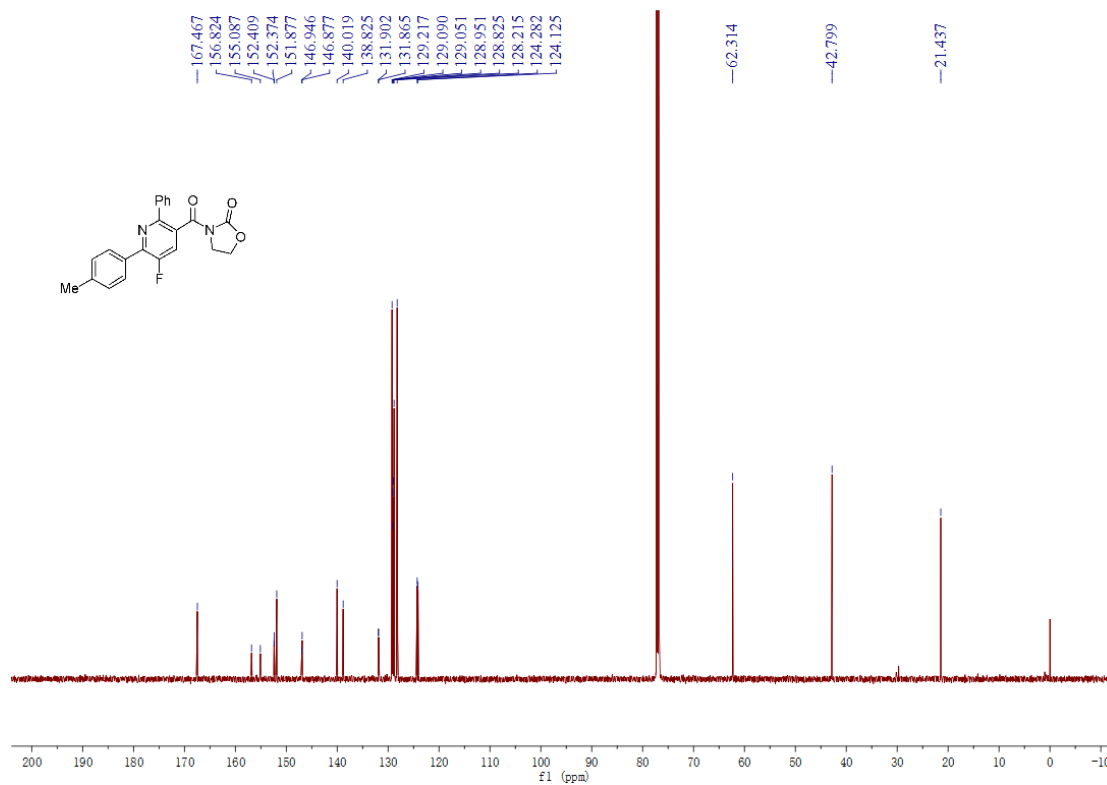

$[^{19}\text{F\_NMR\_565 MHz}]$ 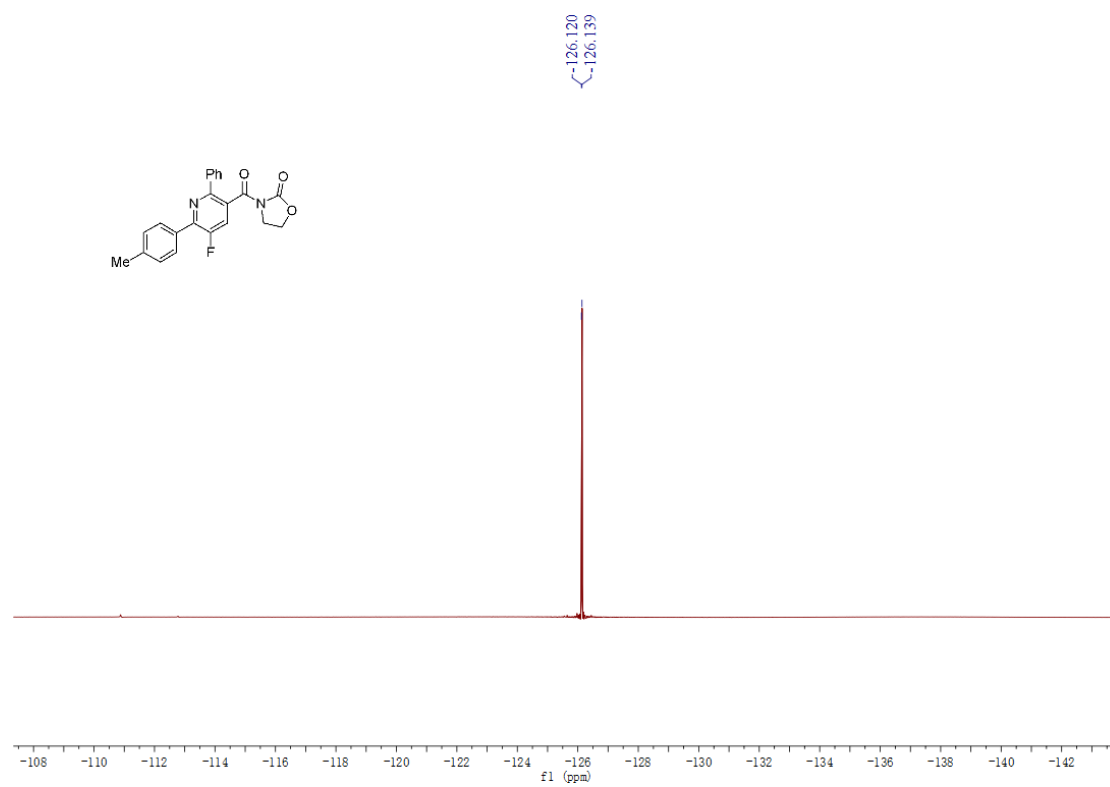

**3-(5-Fluoro-2-phenyl-6-(m-tolyl)nicotinoyl)oxazolidin-2-one (3f)**[ $^1\text{H-NMR}$ \_400 MHz\_( $\text{CDCl}_3$ : 7.26 ppm)]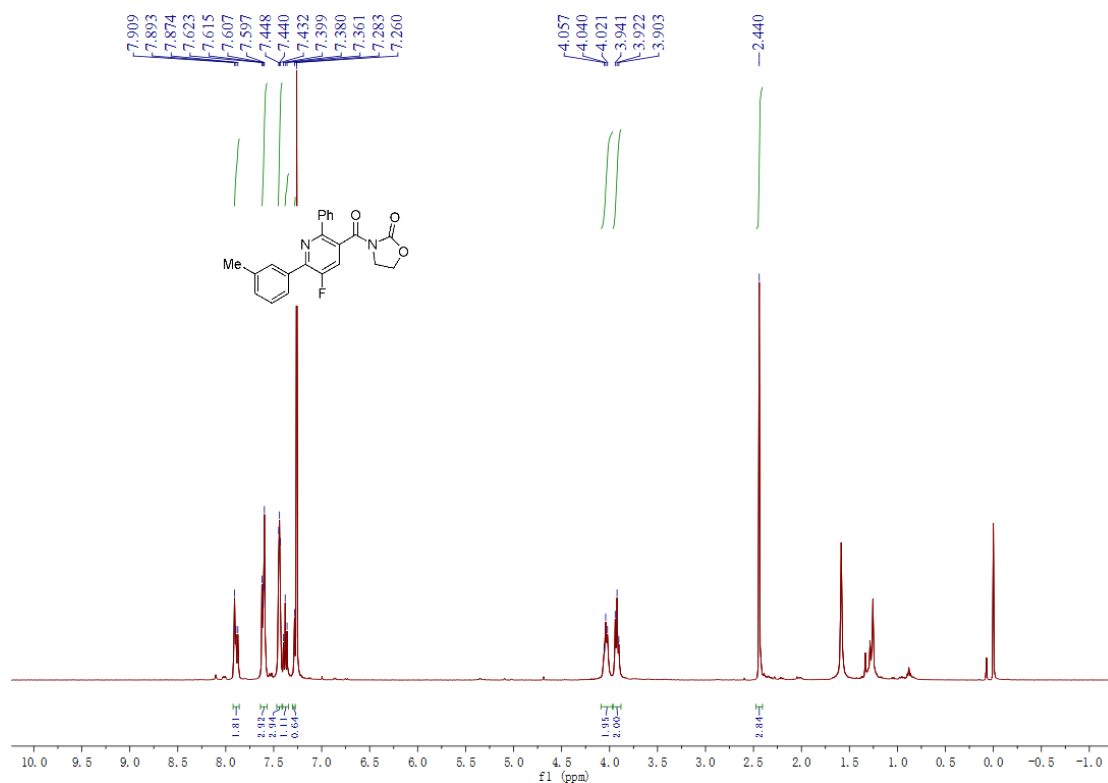[ $^{13}\text{C-NMR}$ \_150 MHz\_( $\text{CDCl}_3$ : 77.00 ppm)]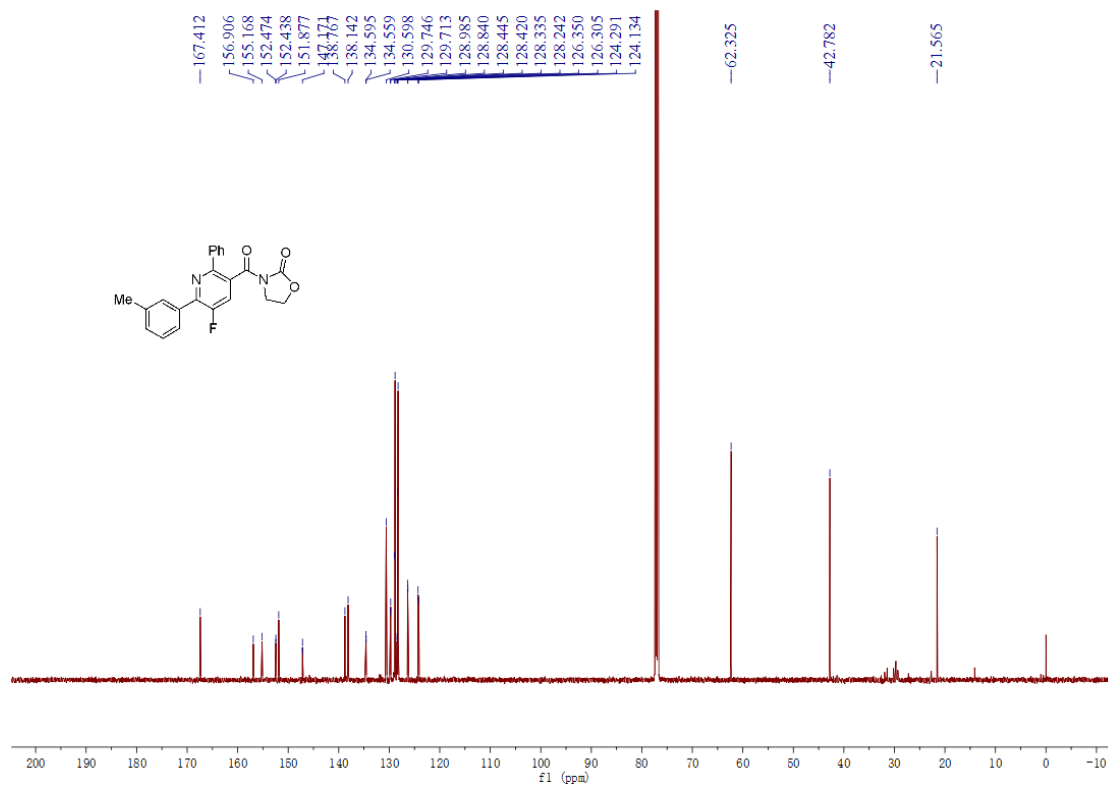

[<sup>19</sup>F\_NMR\_565 MHz]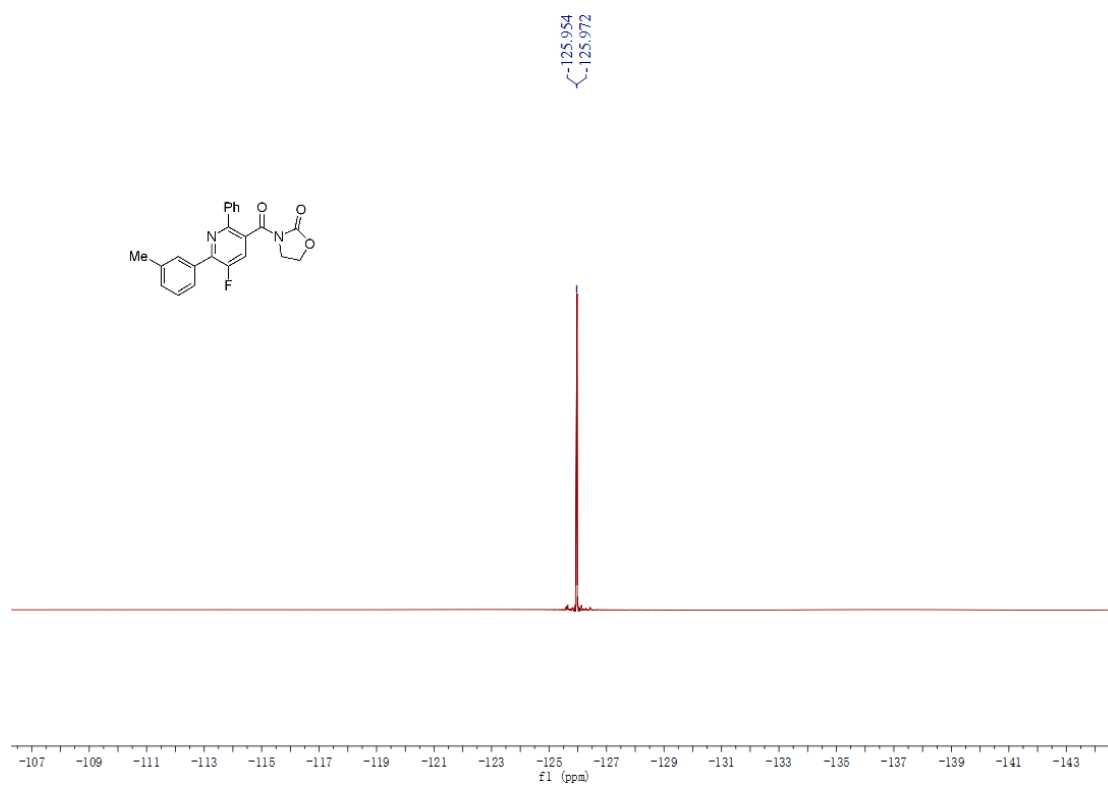

**3-(5-Fluoro-2-(4-fluorophenyl)-6-phenylnicotinoyl)oxazolidin-2-one (3g)**[ $^1\text{H-NMR}$ \_400 MHz\_( $\text{CDCl}_3$ : 7.26 ppm)]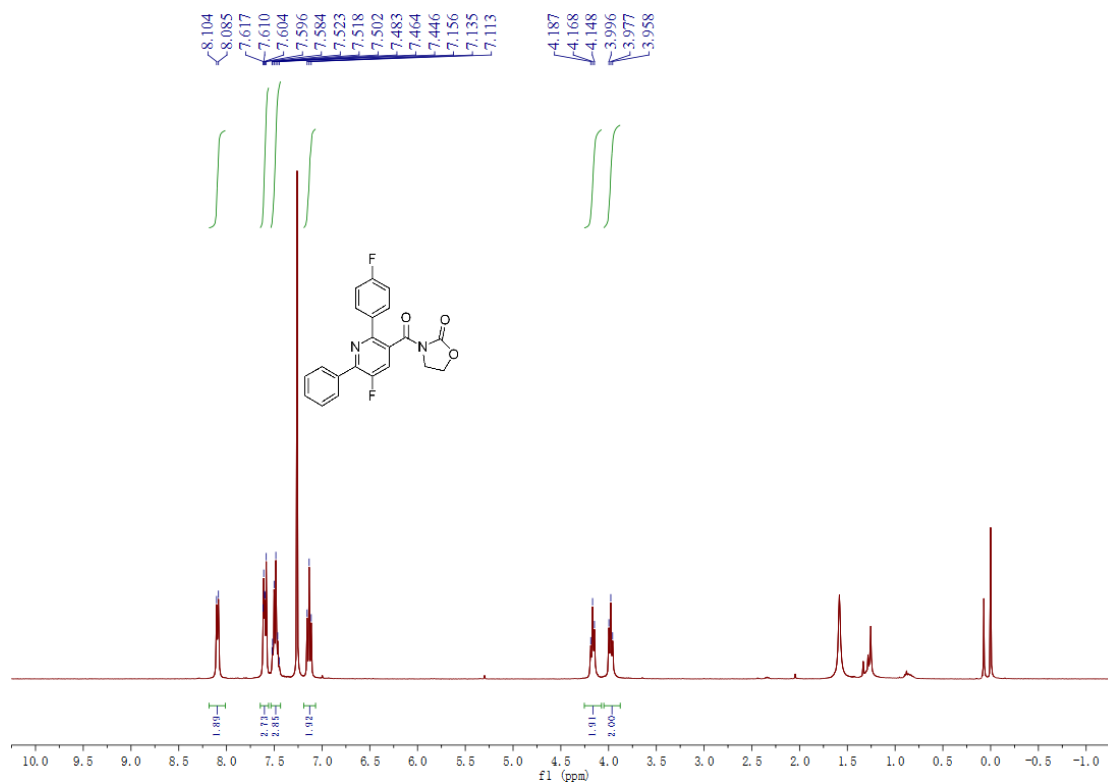[ $^{13}\text{C-NMR}$ \_150 MHz\_( $\text{CDCl}_3$ : 77.00 ppm)]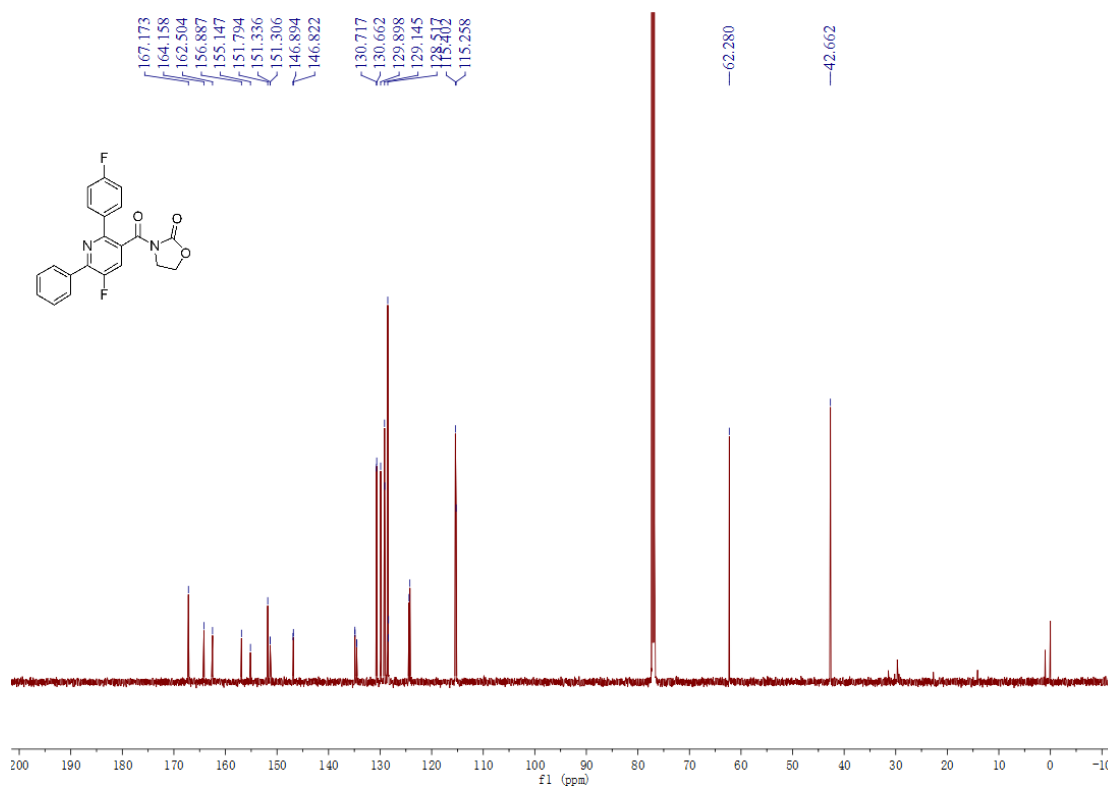

$[^{19}\text{F\_NMR\_565 MHz}]$ 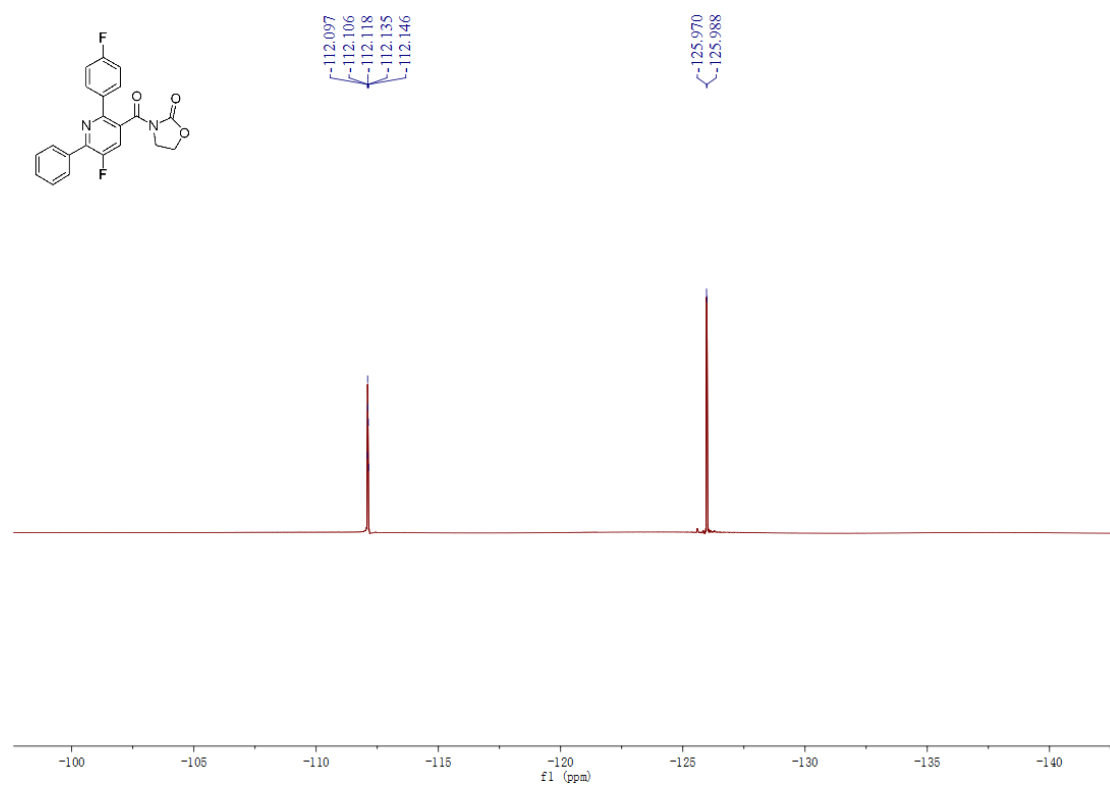

**3-(2-(4-Chlorophenyl)-5-fluoro-6-phenylnicotinoyl)oxazolidin-2-one (3h)**[ $^1\text{H-NMR}$ \_600 MHz\_( $\text{CDCl}_3$ : 7.26 ppm)]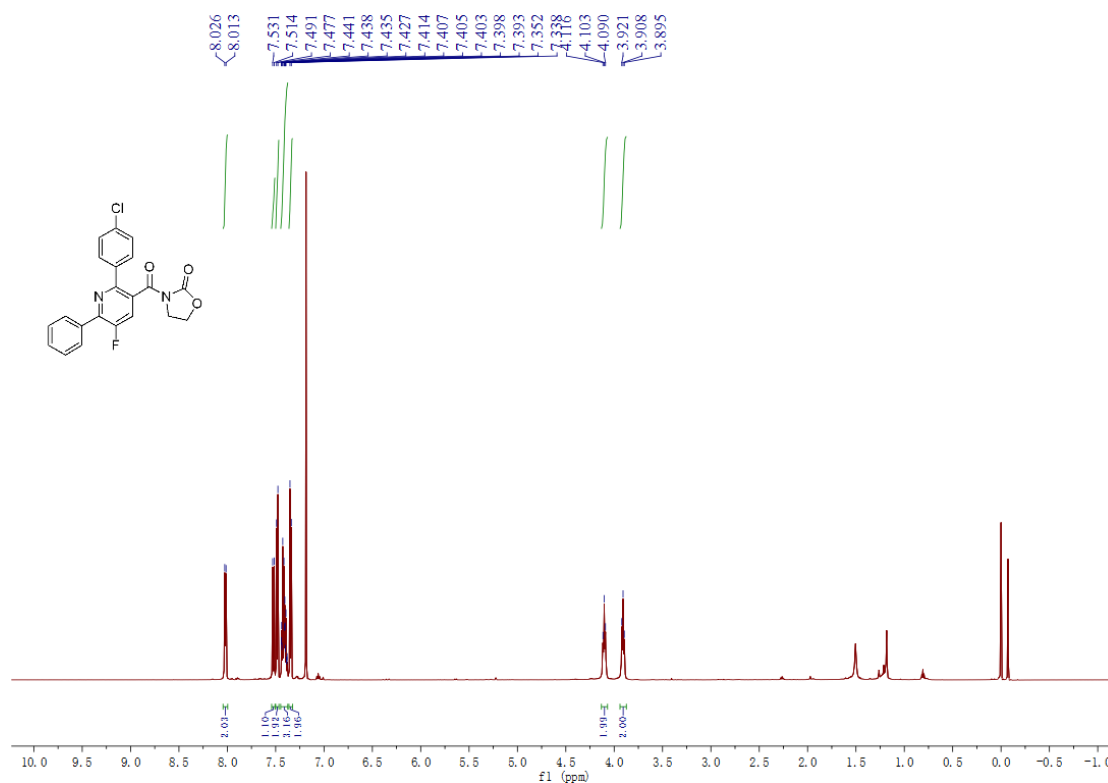[ $^{13}\text{C-NMR}$ \_150 MHz\_( $\text{CDCl}_3$ : 77.00 ppm)]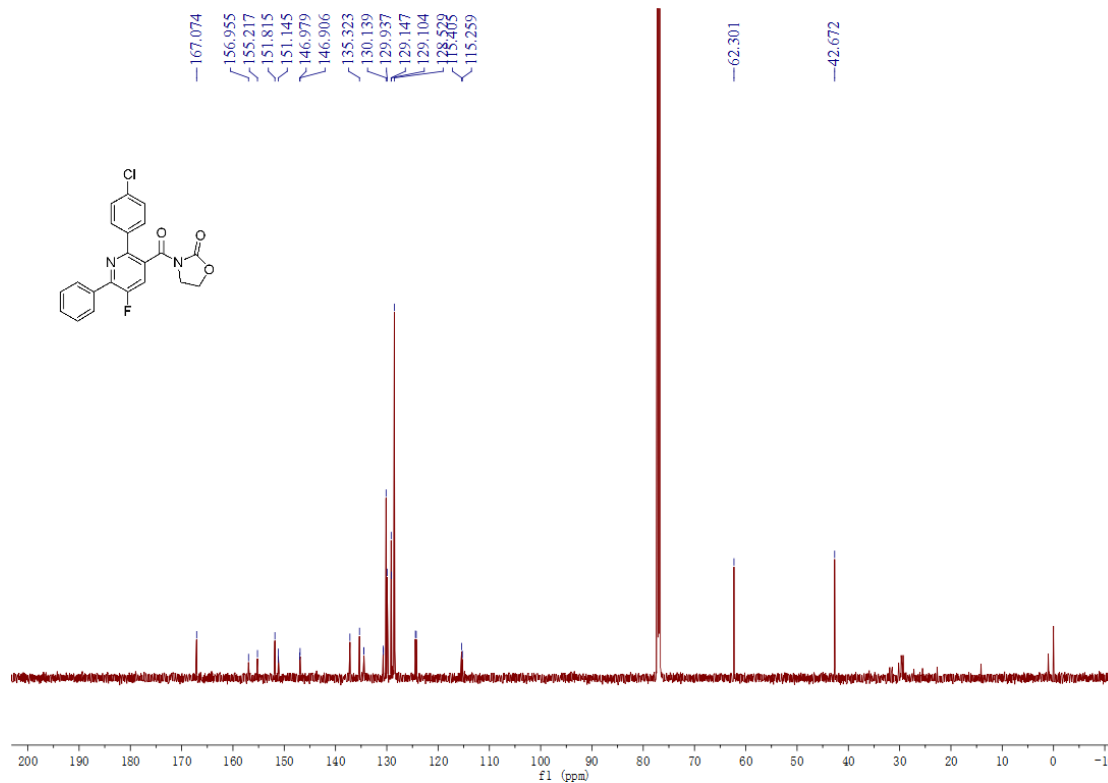



[<sup>19</sup>F\_NMR\_375 MHz]

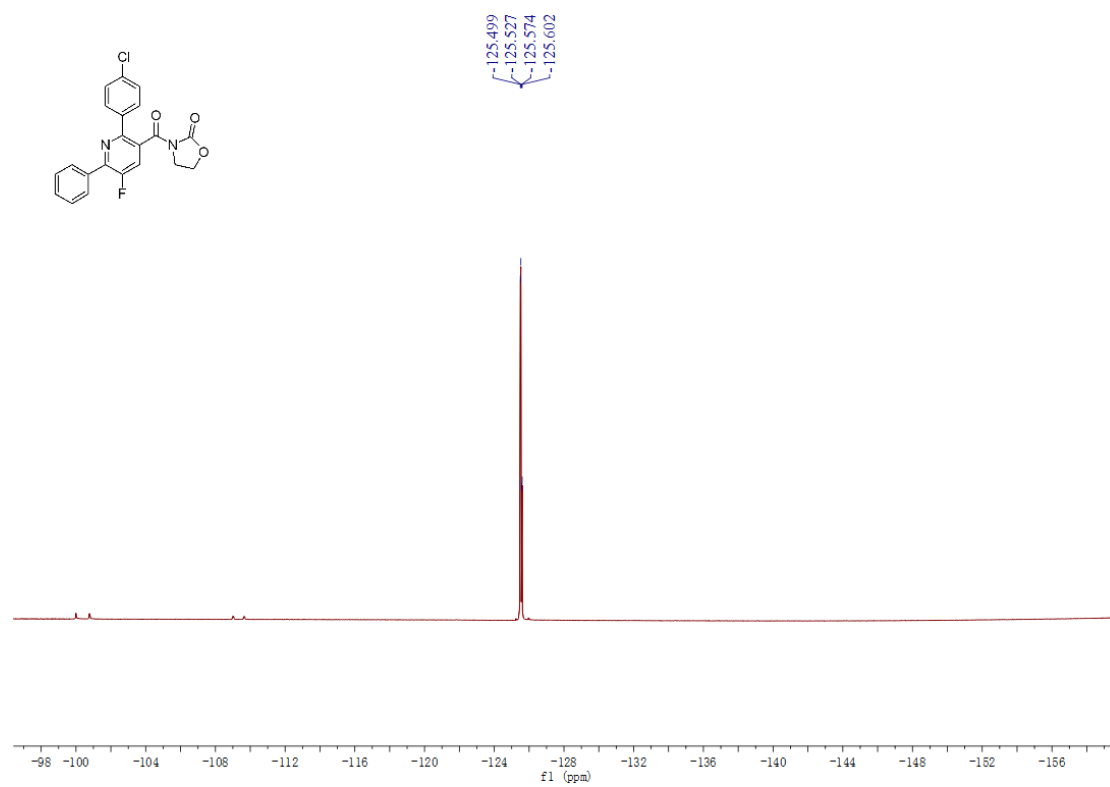

**3-(2-(4-Bromophenyl)-5-fluoro-6-phenylnicotinoyl)oxazolidin-2-one (3i)**[<sup>1</sup>H\_NMR\_400 MHz\_(CDCl<sub>3</sub>: 7.26 ppm)]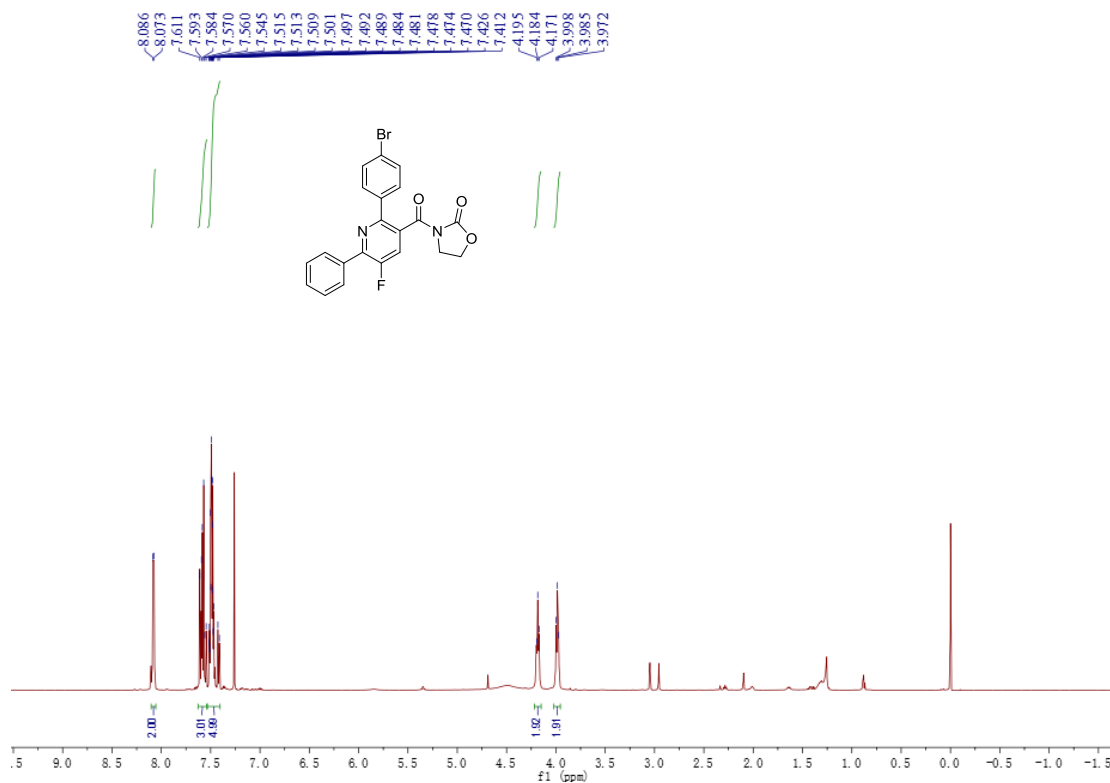[<sup>13</sup>C\_NMR\_150 MHz\_(CDCl<sub>3</sub>: 77.00 ppm)]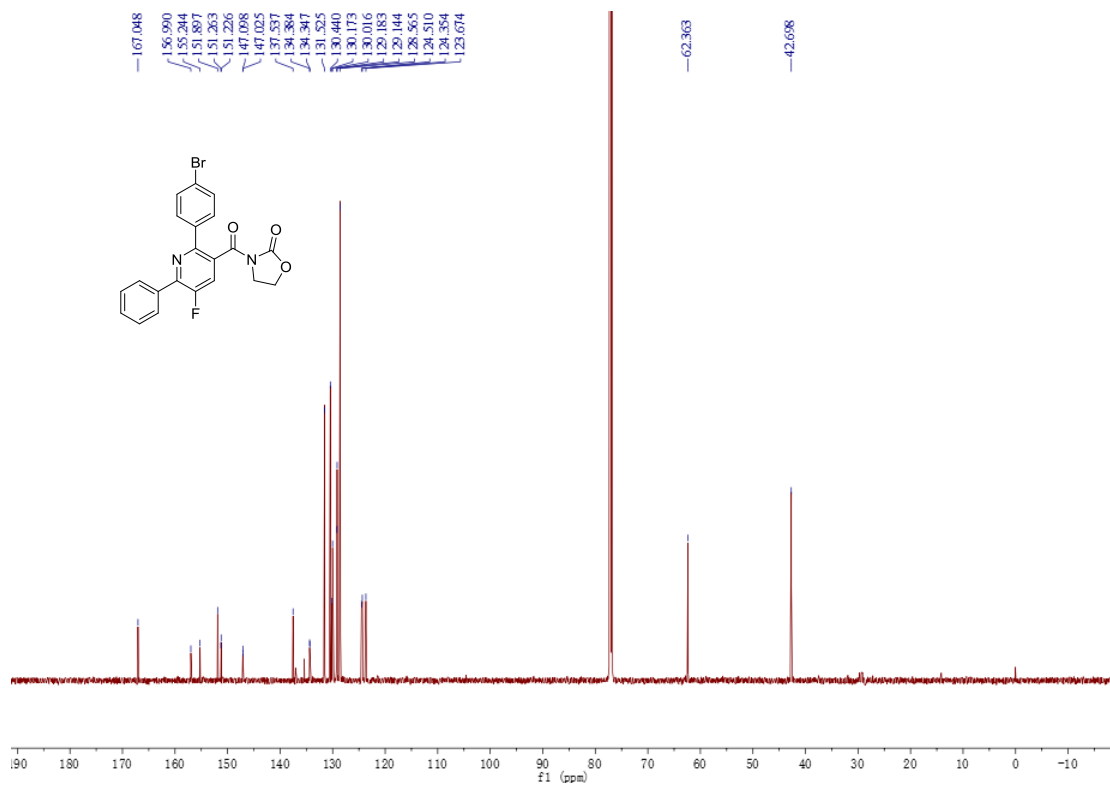

[ $^{19}\text{F}$ \_NMR\_375 MHz]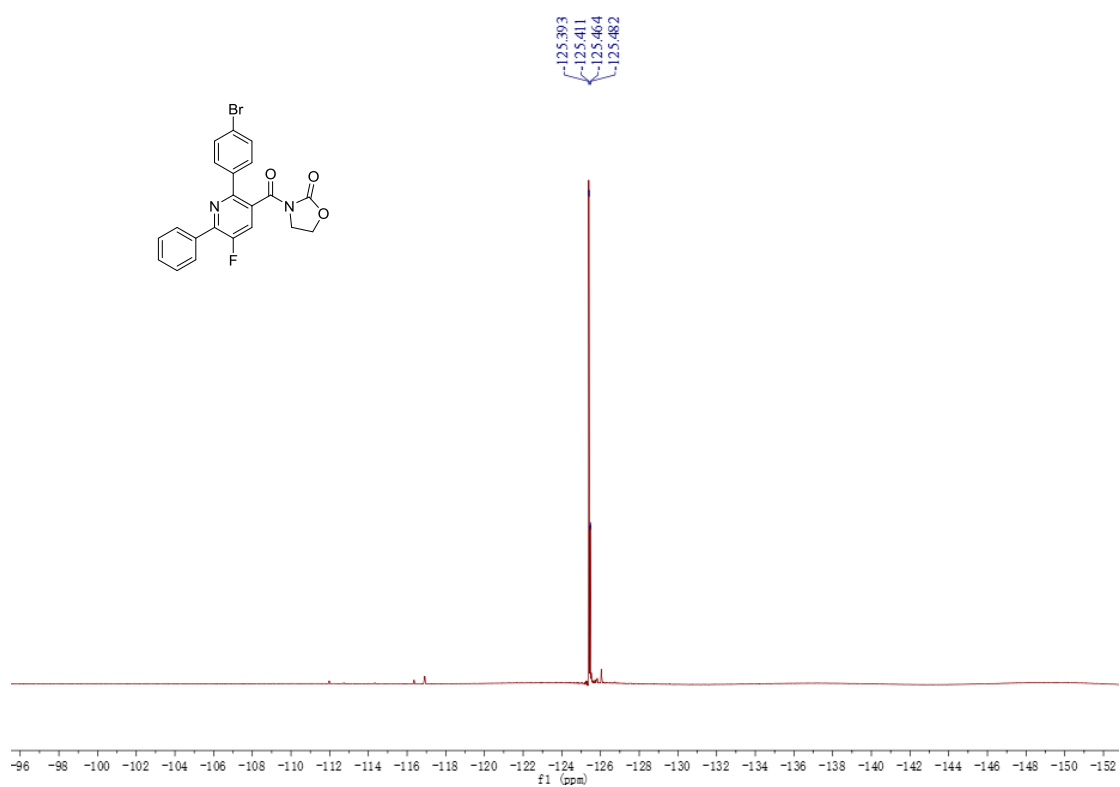

**3-(2-(3-Chlorophenyl)-5-fluoro-6-phenylnicotinoyl)oxazolidin-2-one (3j)**[<sup>1</sup>H\_NMR\_600 MHz\_(CDCl<sub>3</sub>: 7.26 ppm)]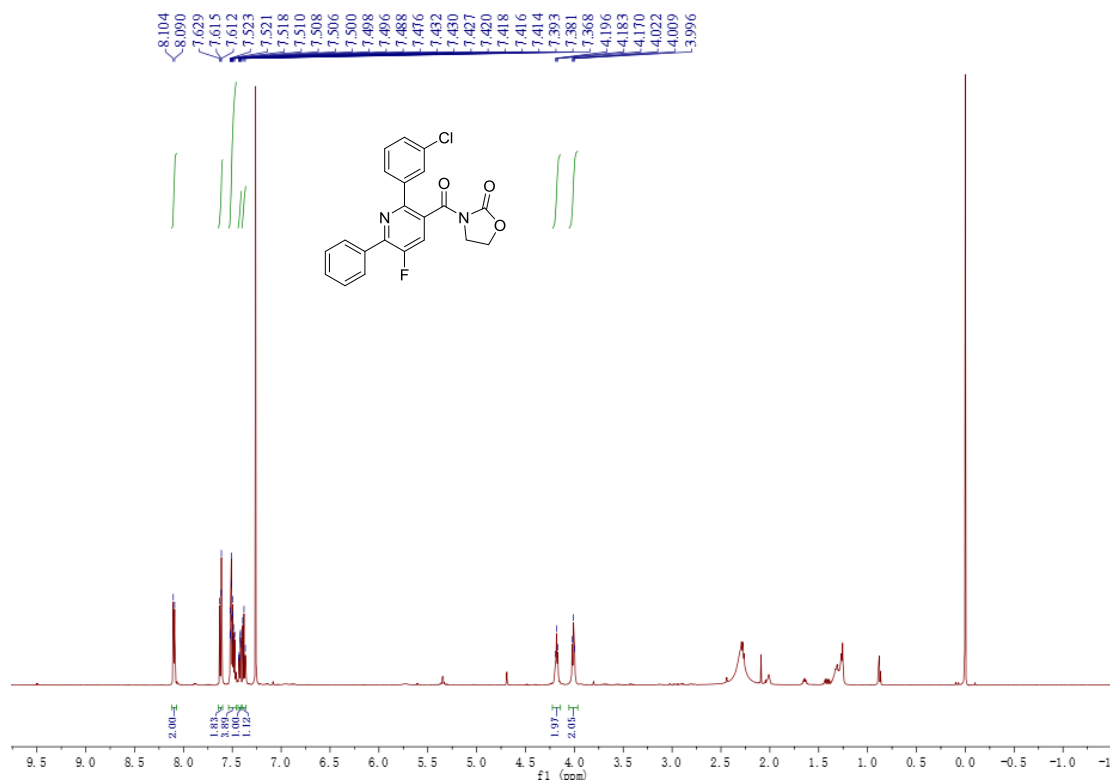[<sup>13</sup>C\_NMR\_150 MHz\_(CDCl<sub>3</sub>: 77.00 ppm)]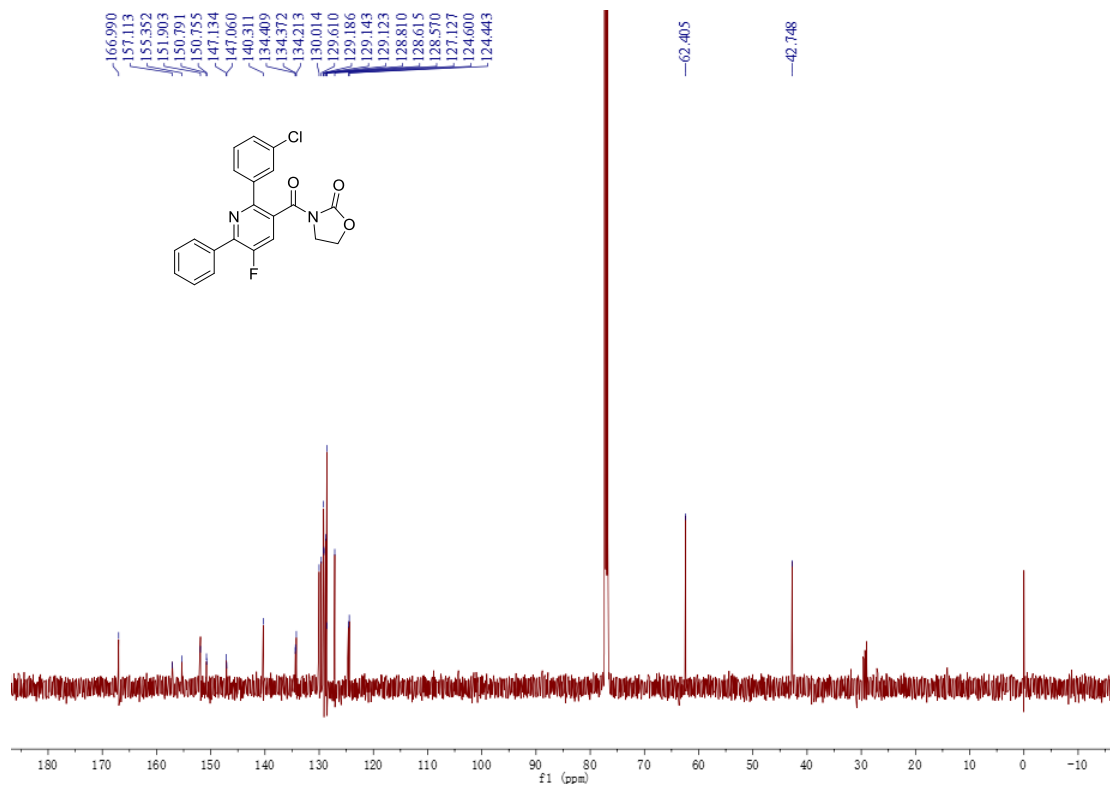

$[^{19}\text{F\_NMR\_565 MHz}]$ 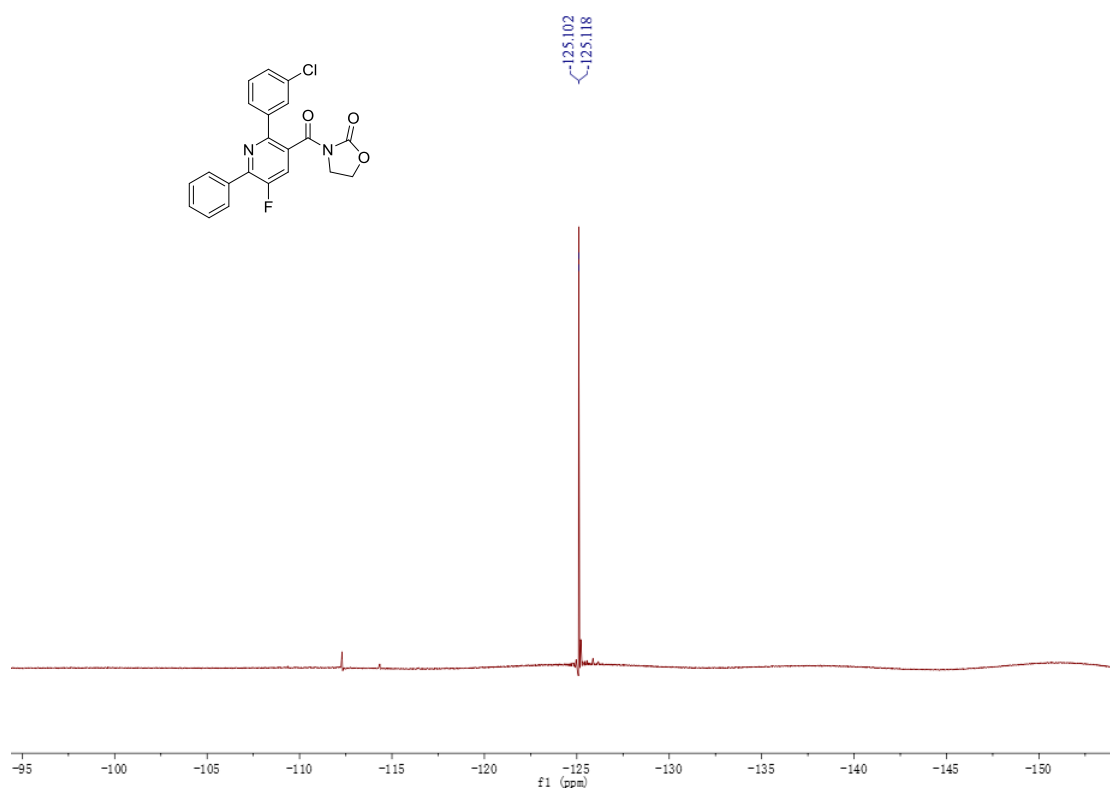

**3-(5-Fluoro-2-(4-methoxyphenyl)-6-phenylnicotinoyl)oxazolidin-2-one (3k)**[<sup>1</sup>H\_NMR\_400 MHz\_(CDCl<sub>3</sub>: 7.26 ppm)]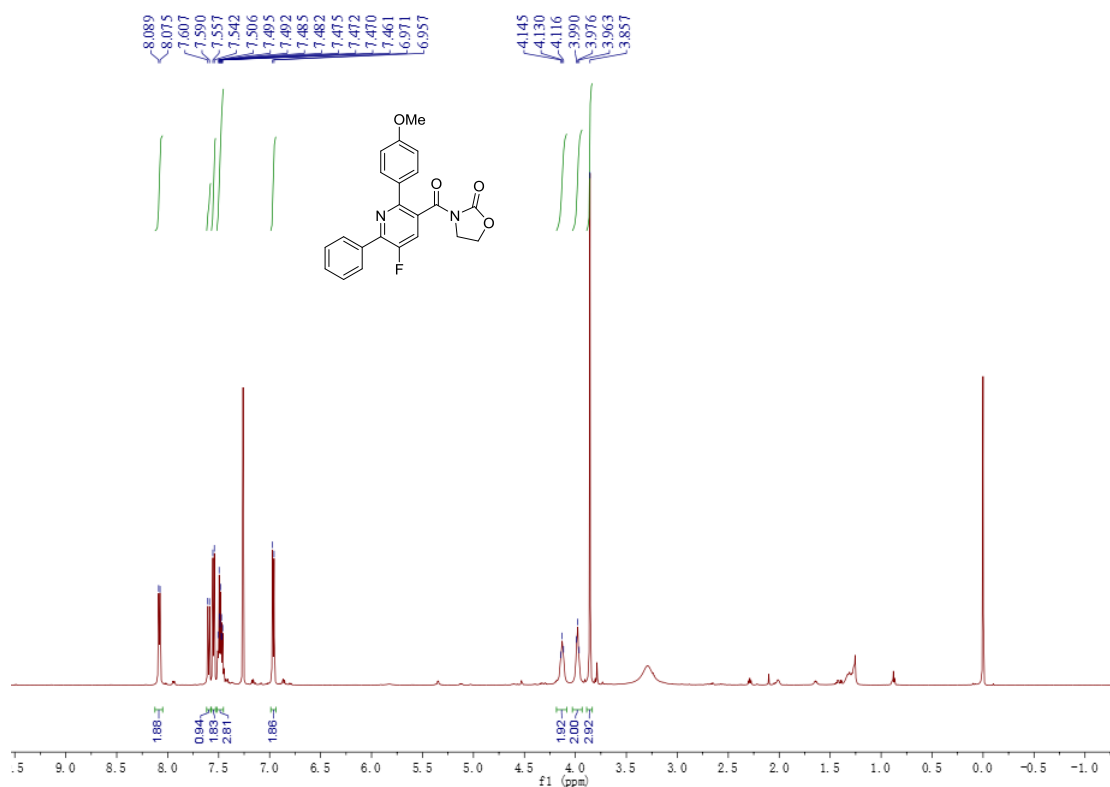[<sup>13</sup>C\_NMR\_150 MHz\_(CDCl<sub>3</sub>: 77.00 ppm)]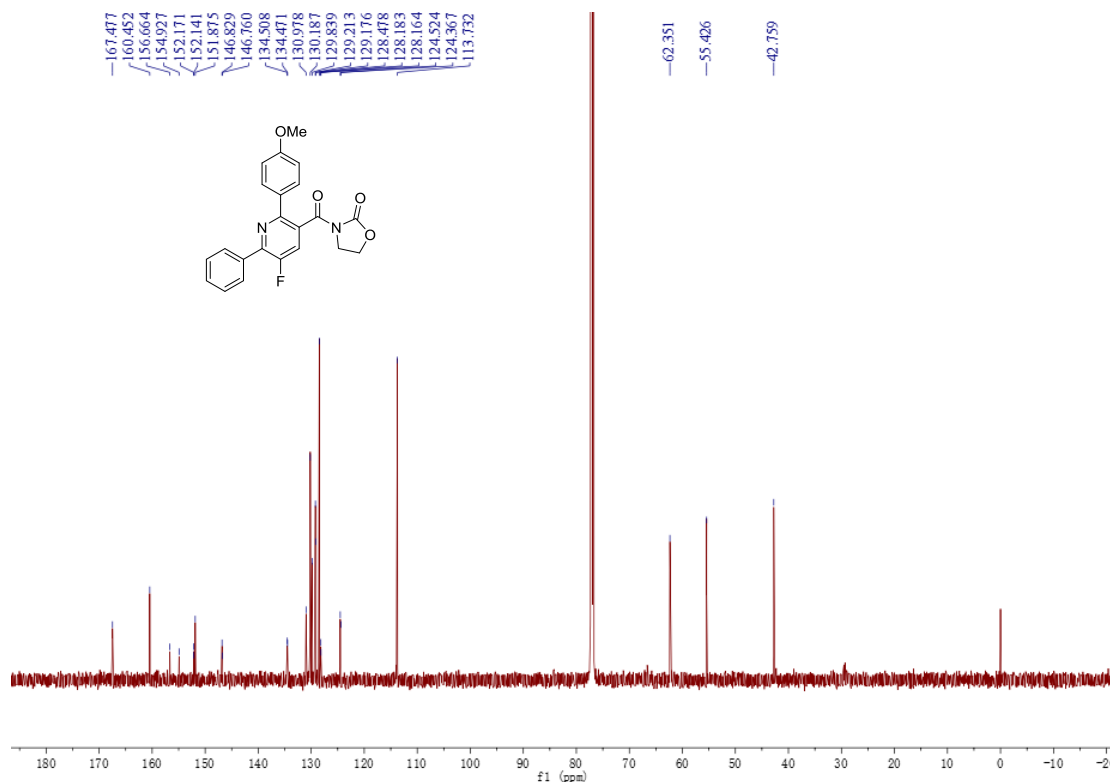

[ $^{19}\text{F}$ \_NMR\_565 MHz]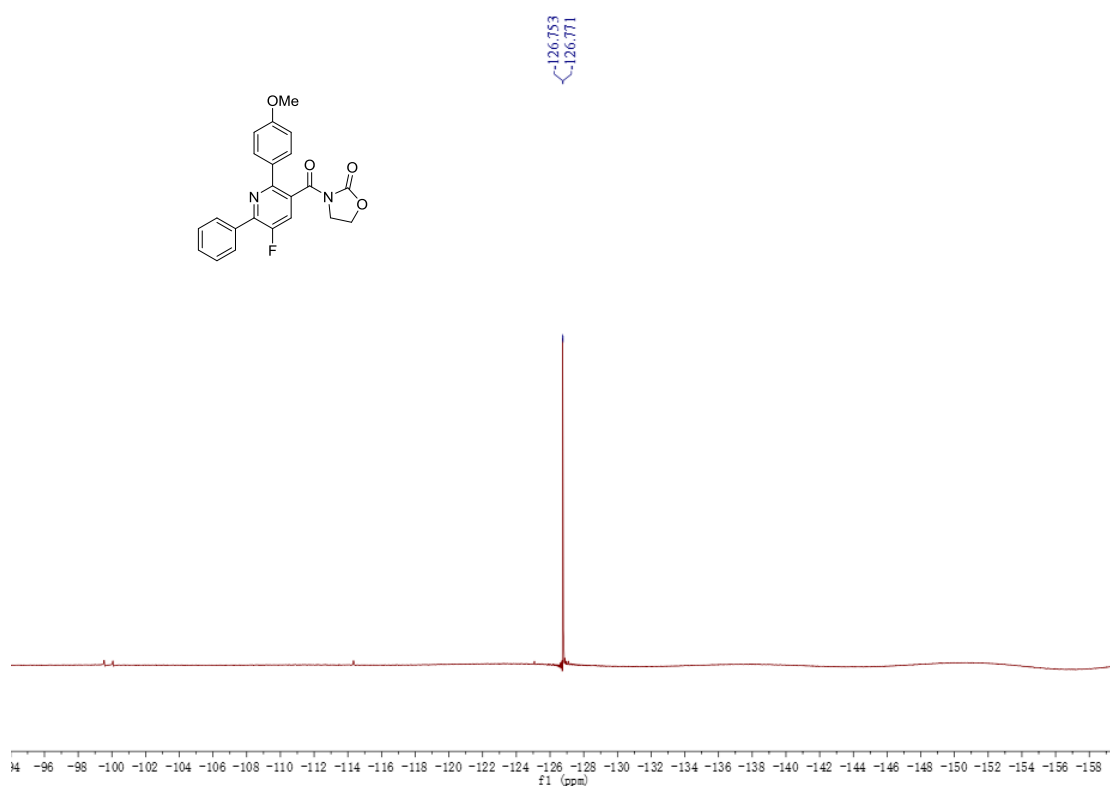

**3-(5-Fluoro-2-(4-fluoro-3-methylphenyl)-6-phenylnicotinoyl)oxazolidin-2-one (31)**[ $^1\text{H-NMR}$ \_400 MHz\_( $\text{CDCl}_3$ : 7.26 ppm)]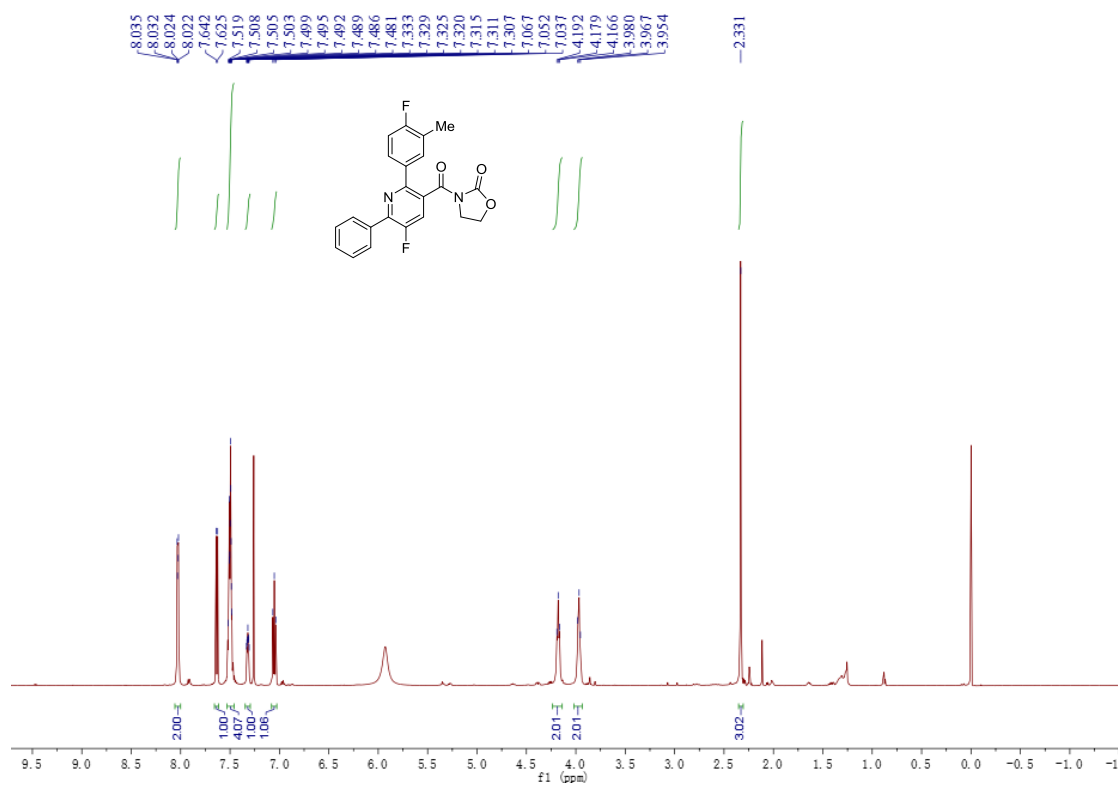[ $^{13}\text{C-NMR}$ \_150 MHz\_( $\text{CDCl}_3$ : 77.00 ppm)]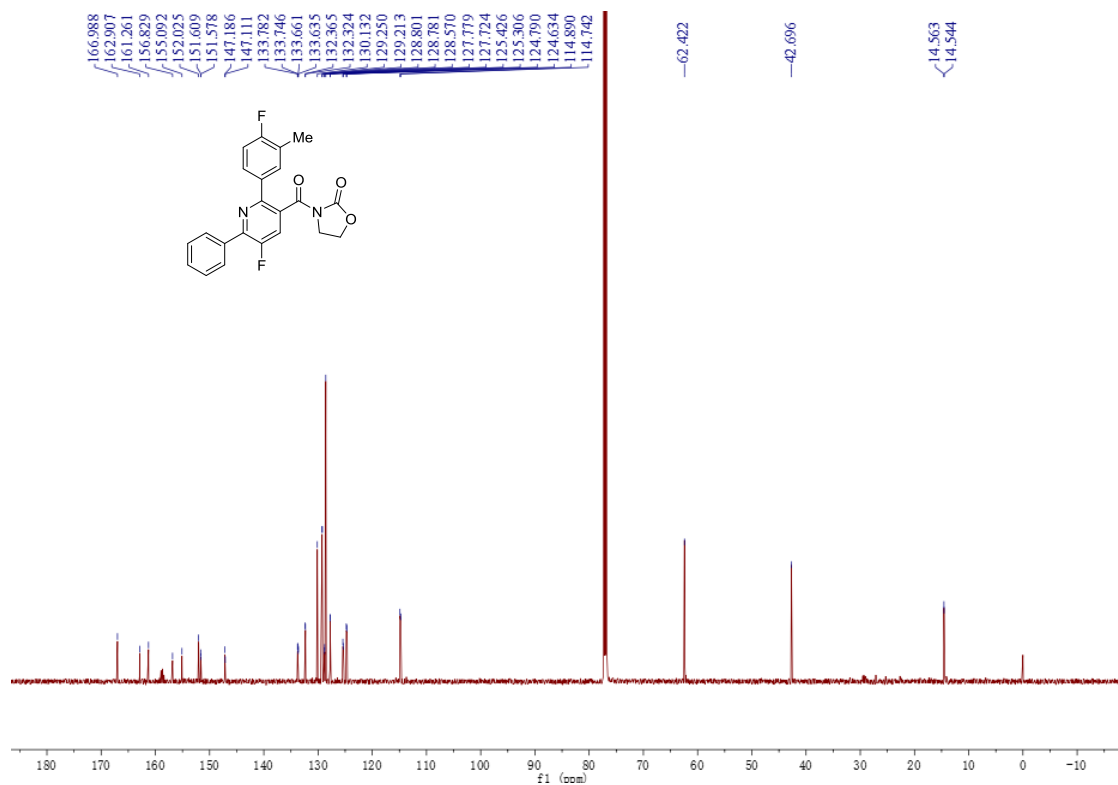



[ $^{19}\text{F}$ \_NMR\_565 MHz]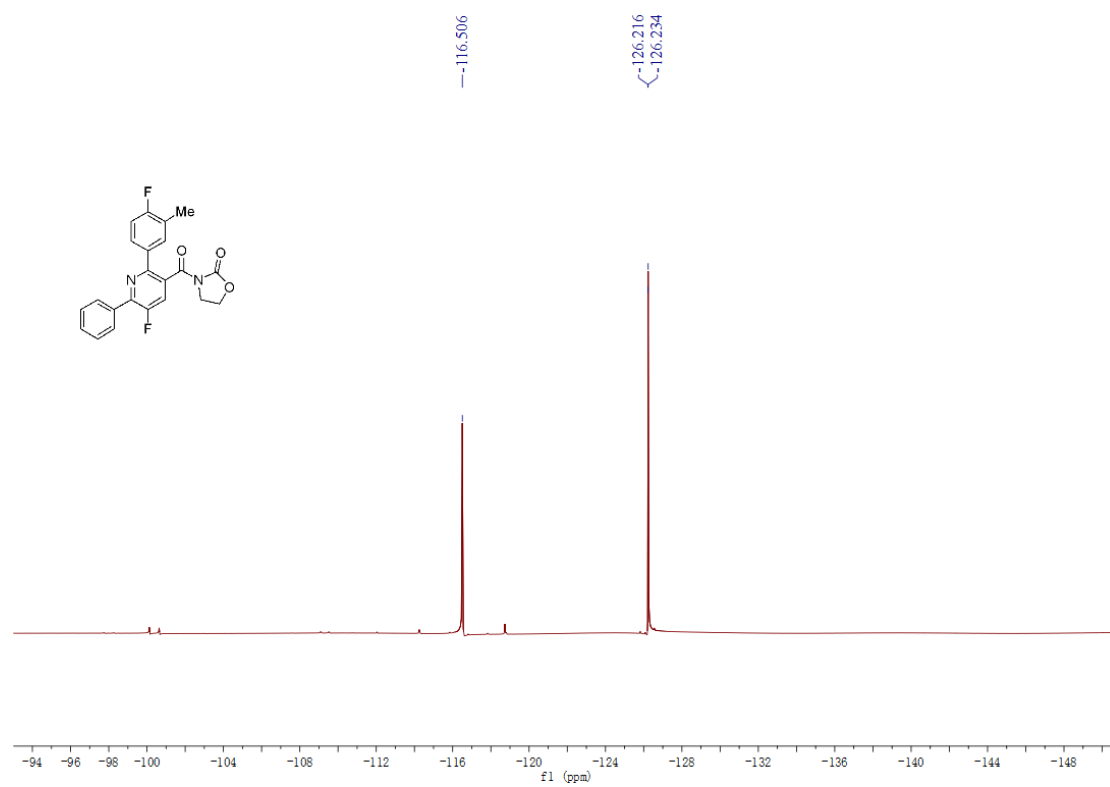

**(R)-3-(5-Fluoro-2,6-diphenylnicotinoyl)-4-isopropylloxazolidin-2-one (3m)** $^1\text{H-NMR}$ \_400 MHz\_( $\text{CDCl}_3$ : 7.26 ppm)]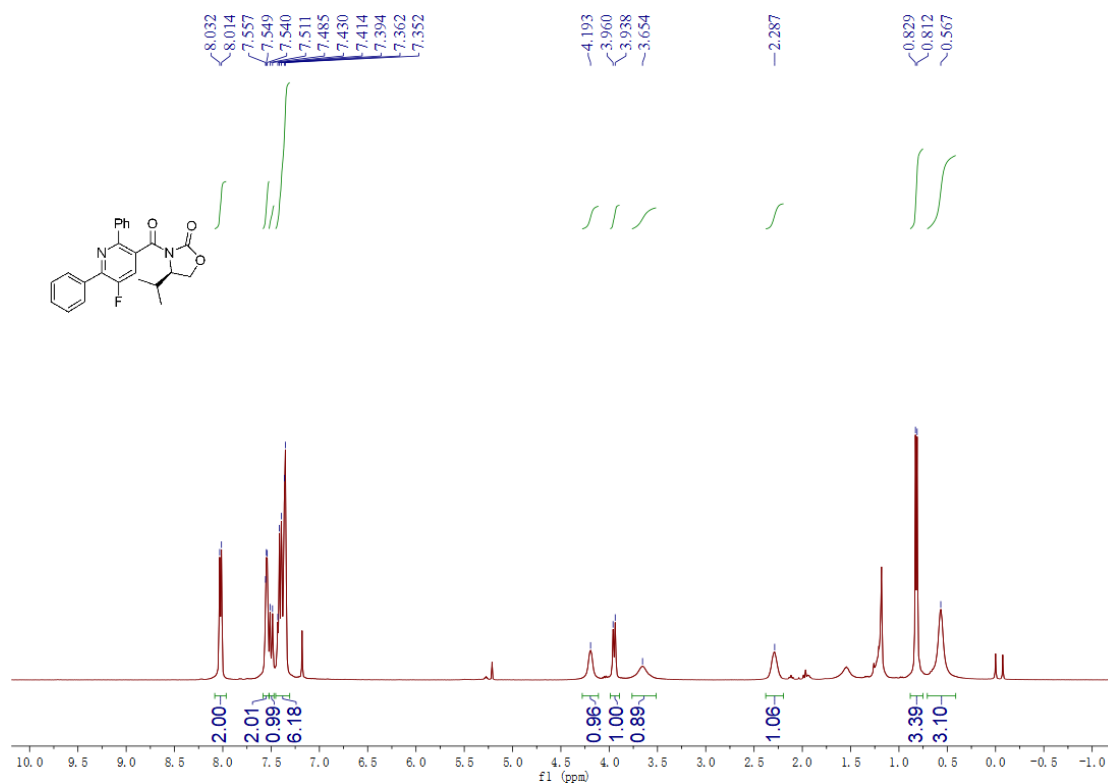 $^{13}\text{C-NMR}$ \_100 MHz\_( $\text{CDCl}_3$ : 77.00 ppm)]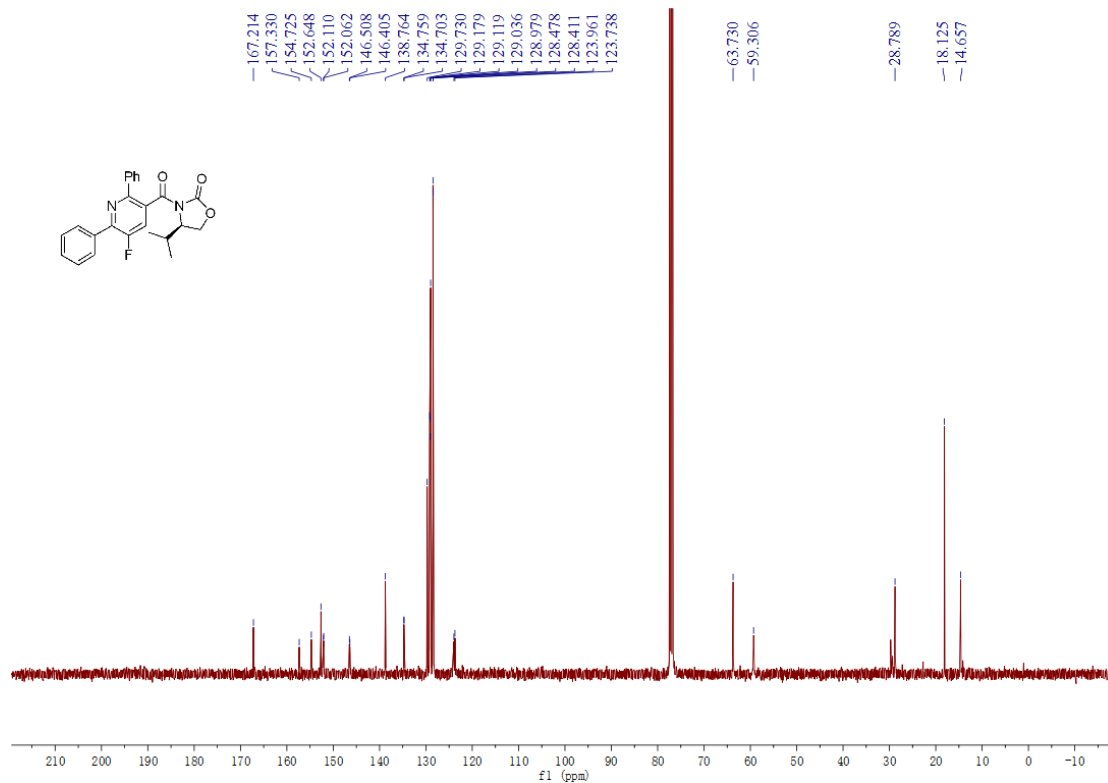

[<sup>19</sup>F\_NMR\_375 MHz]

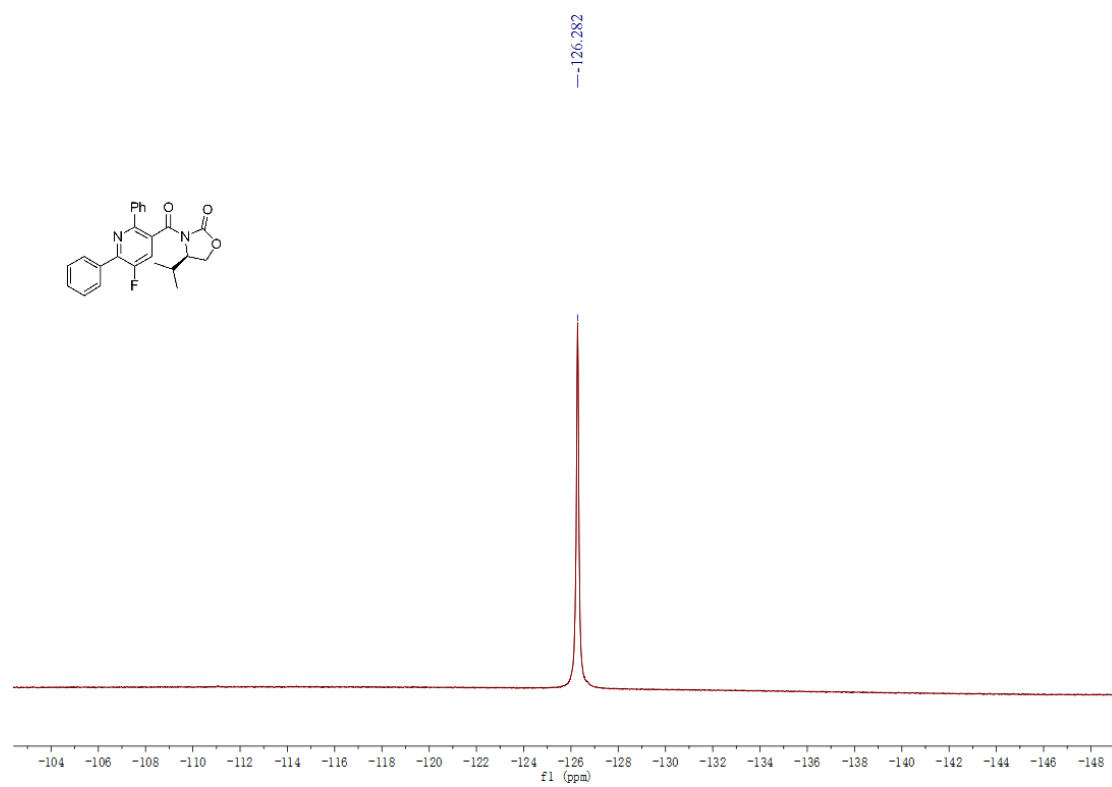

**(S)-3-(5-Fluoro-2,6-diphenylnicotinoyl)-4-phenyloxazolidin-2-one (3n)**[<sup>1</sup>H\_NMR\_400 MHz\_(CDCl<sub>3</sub>: 7.26 ppm)]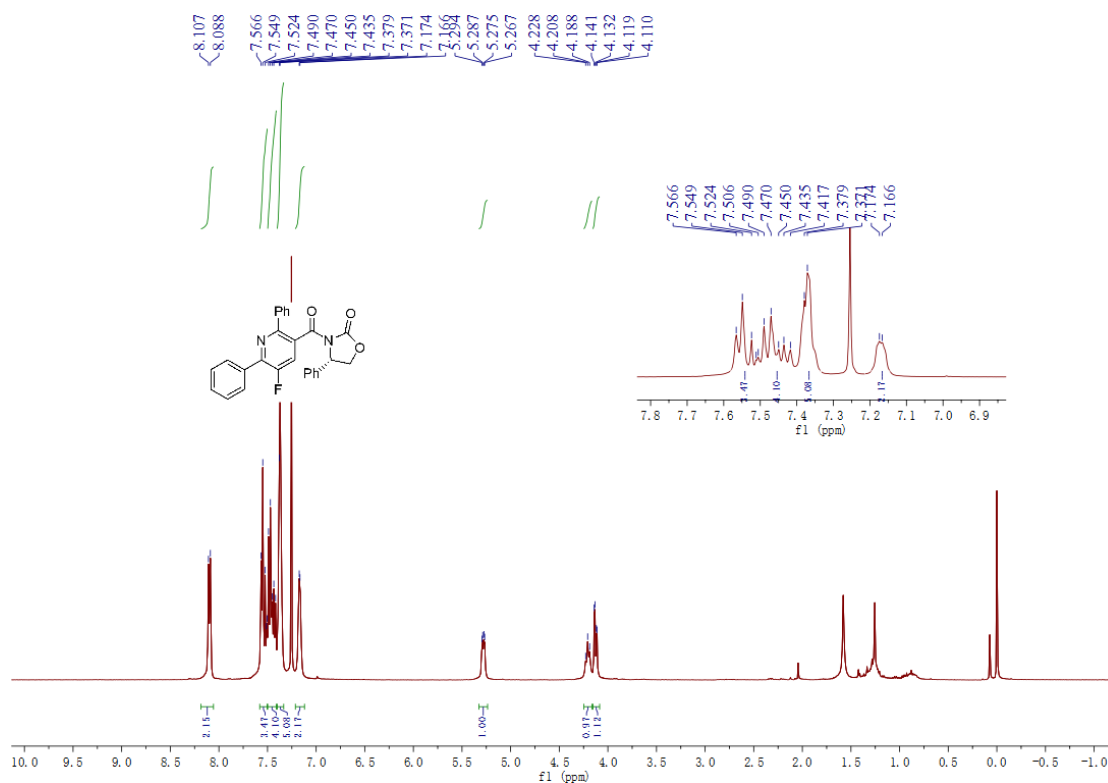[<sup>13</sup>C\_NMR\_100 MHz\_(CDCl<sub>3</sub>: 77.00 ppm)]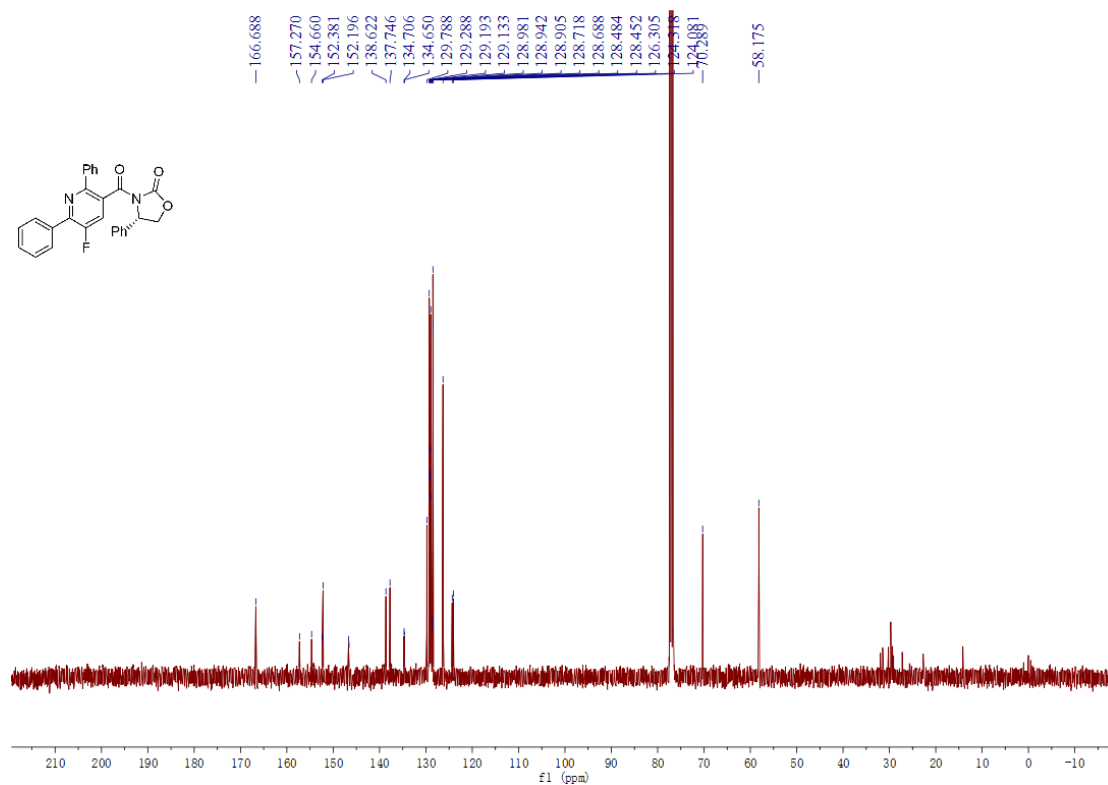

[<sup>19</sup>F\_NMR\_375 MHz]

<sup>19</sup>F NMR (376 MHz, CDCl<sub>3</sub>) δ -126.29 (d, J= 9.3 Hz).

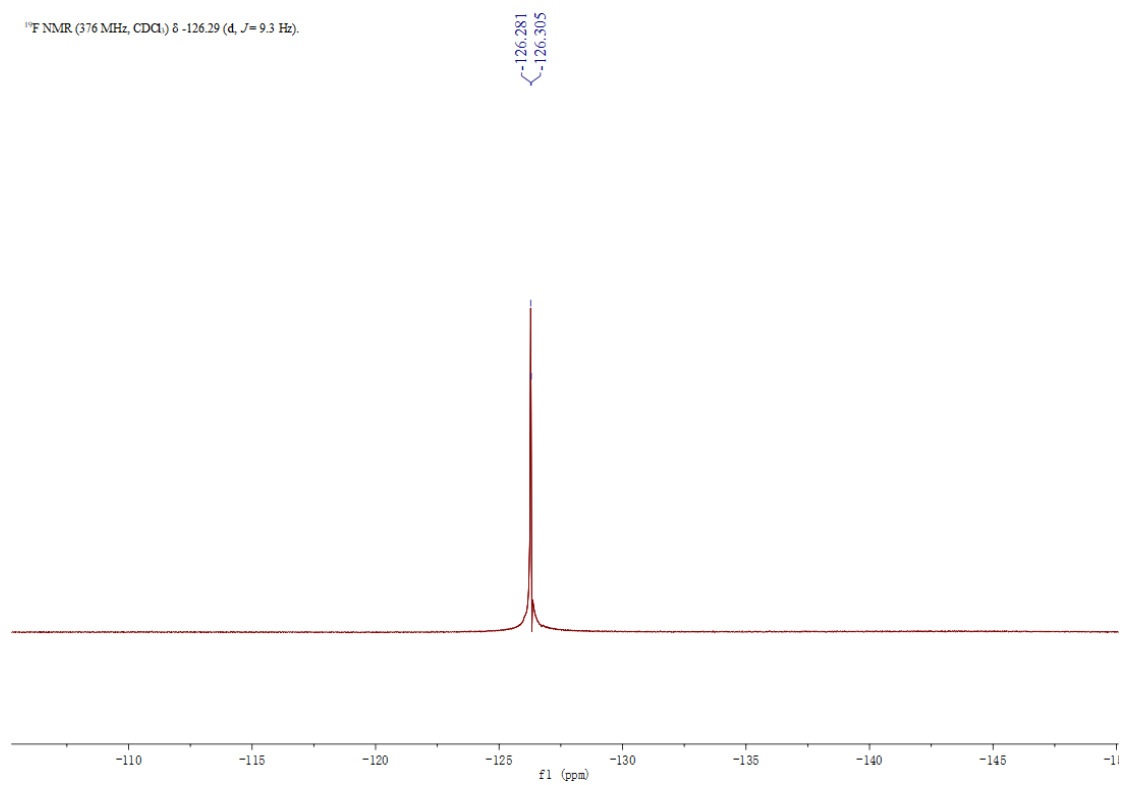

**1-(5-Fluoro-2,6-diphenylnicotinoyl)pyrrolidin-2-one (3o)**[<sup>1</sup>H\_NMR\_400 MHz\_(CDCl<sub>3</sub>: 7.26 ppm)]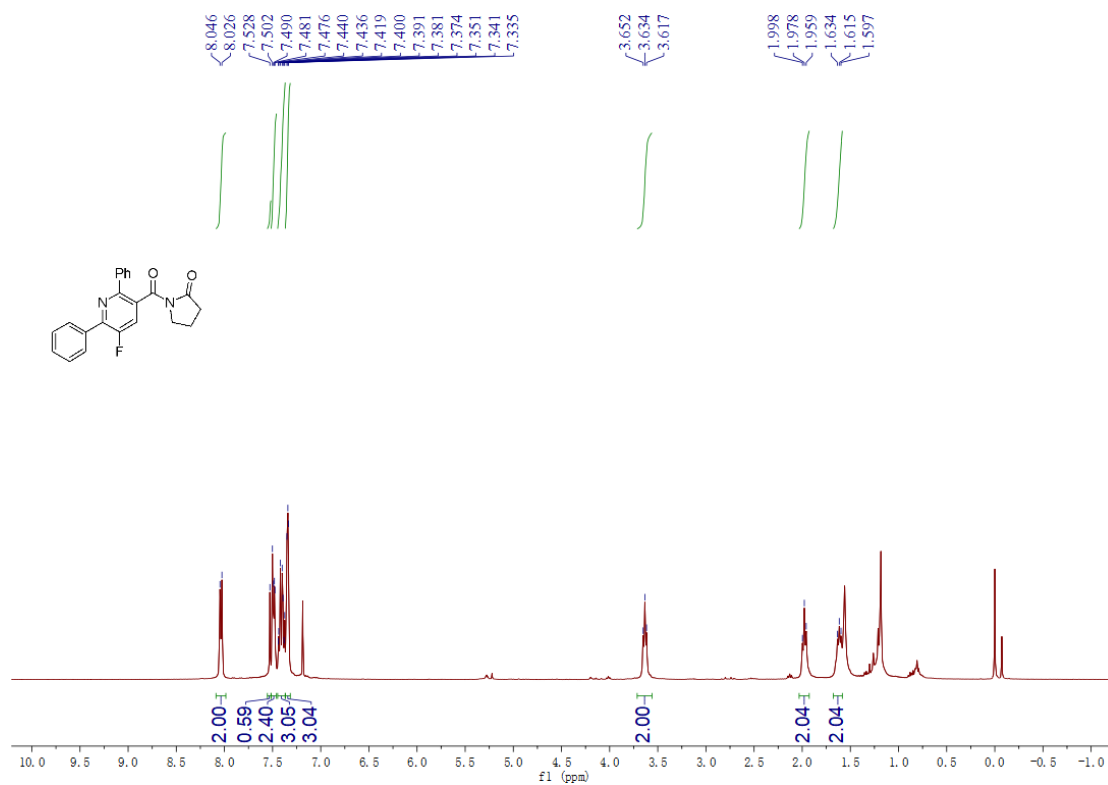[<sup>13</sup>C\_NMR\_150 MHz\_(CDCl<sub>3</sub>: 77.00 ppm)]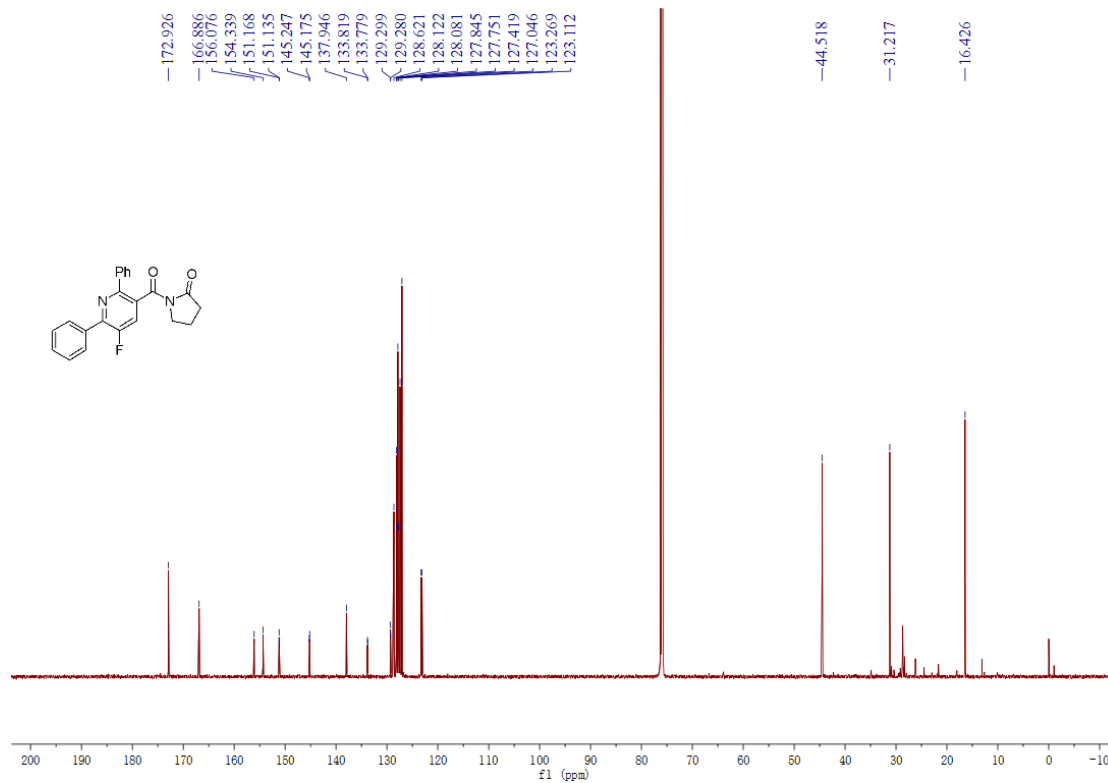

[ $^{19}\text{F}$ \_NMR\_565 MHz]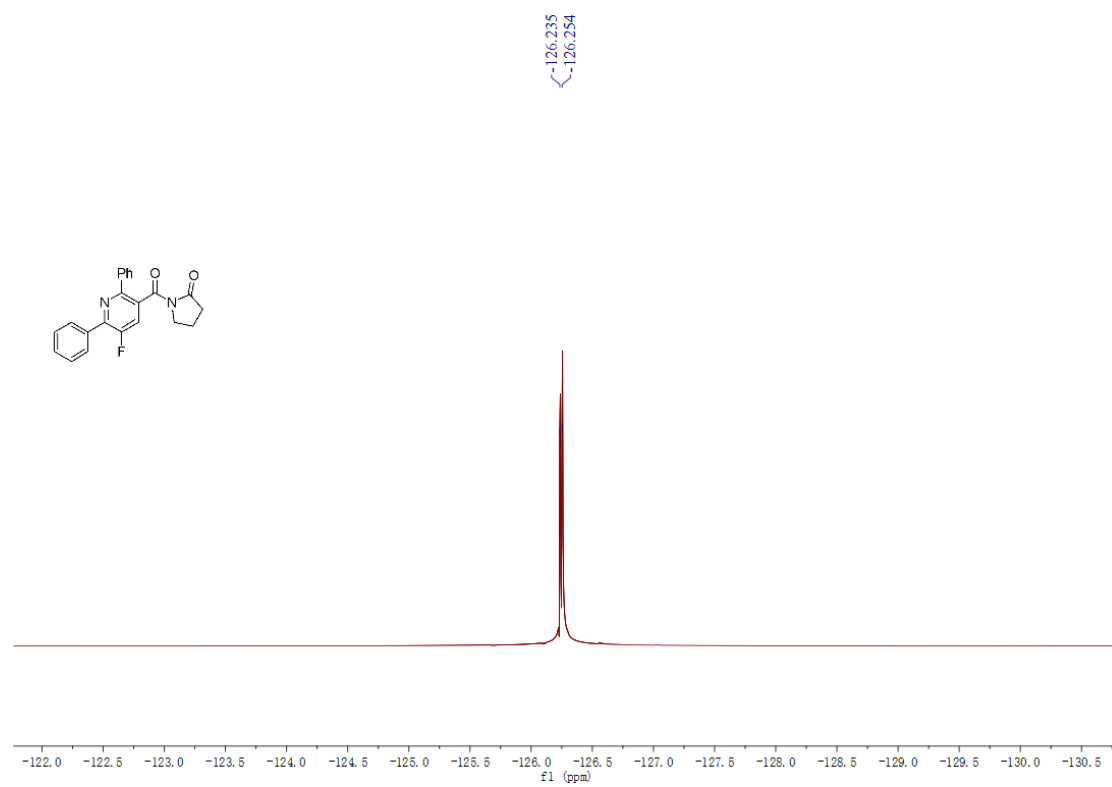

**1-(5-Fluoro-2,6-diphenylnicotinoyl)piperidin-2-one (3p)**[<sup>1</sup>H\_NMR\_400 MHz\_(CDCl<sub>3</sub>: 7.26 ppm)]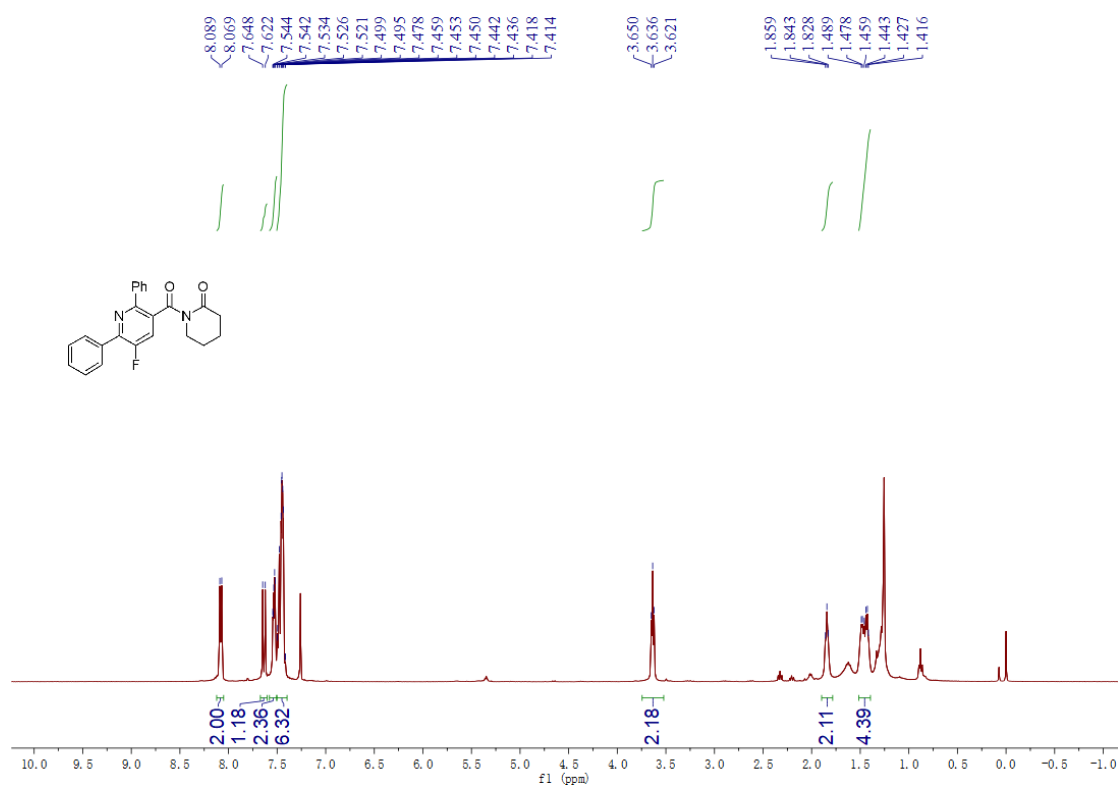[<sup>13</sup>C\_NMR\_100 MHz\_(CDCl<sub>3</sub>: 77.00 ppm)]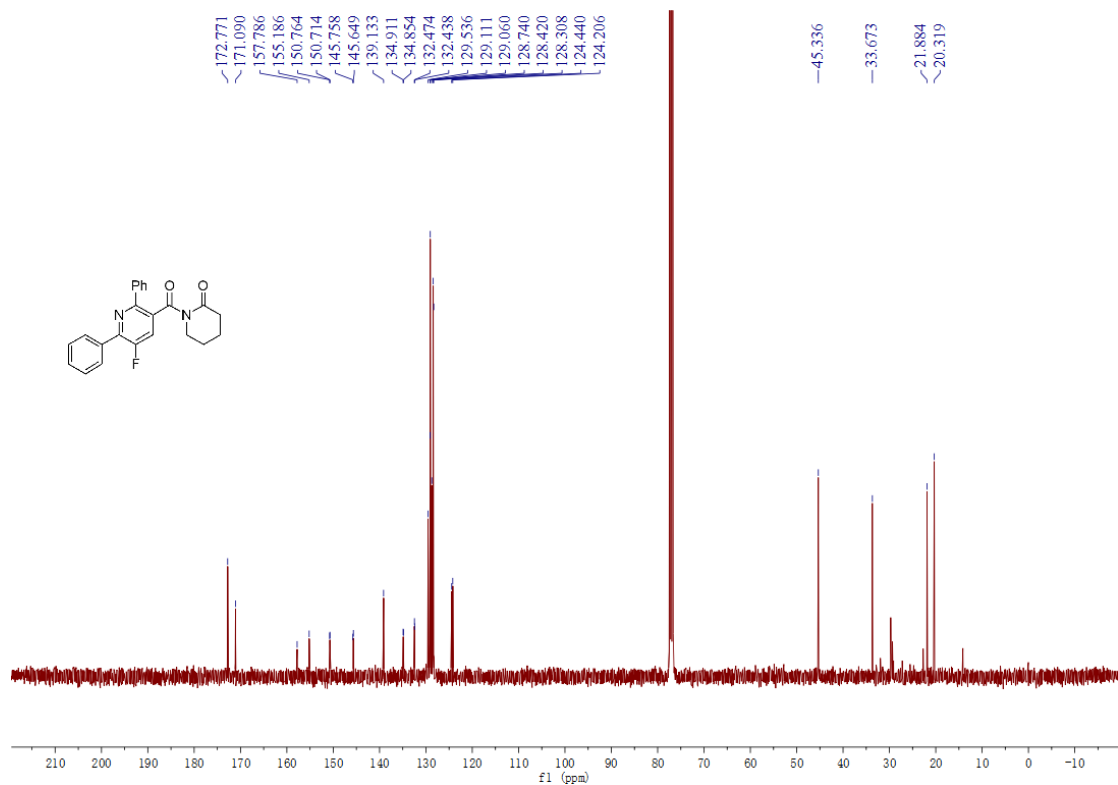



[ $^{19}\text{F}$ \_NMR\_375 MHz]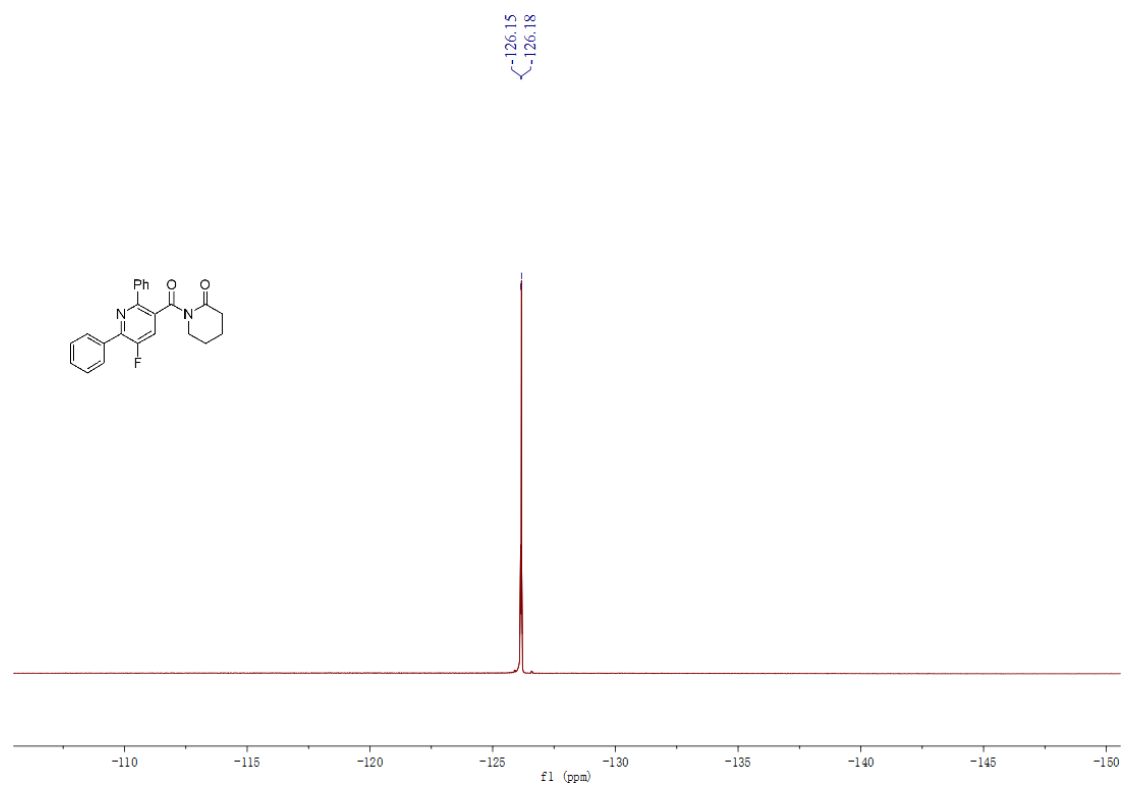

**2-(5-Fluoro-2,6-diphenylnicotinoyl)-2-azaspiro[4.5]decan-1-one (3q)**[<sup>1</sup>H\_NMR\_400 MHz\_(CDCl<sub>3</sub>: 7.26 ppm)]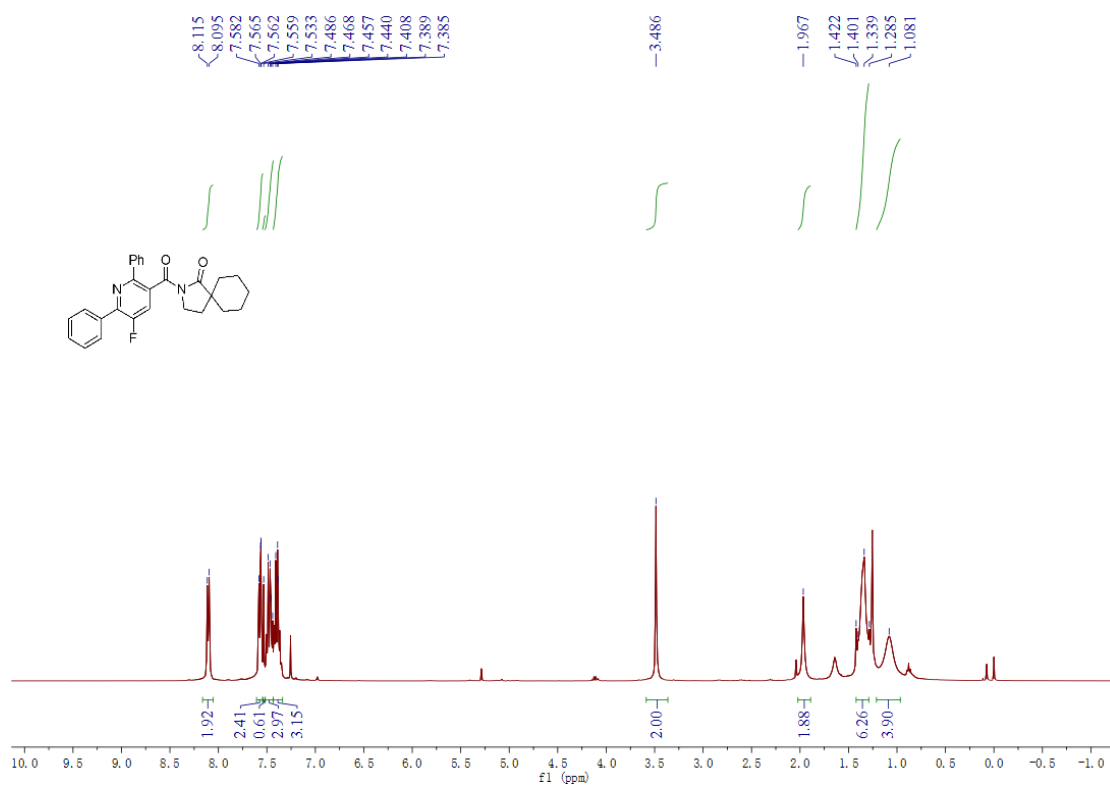[<sup>13</sup>C\_NMR\_100 MHz\_(CDCl<sub>3</sub>: 77.00 ppm)]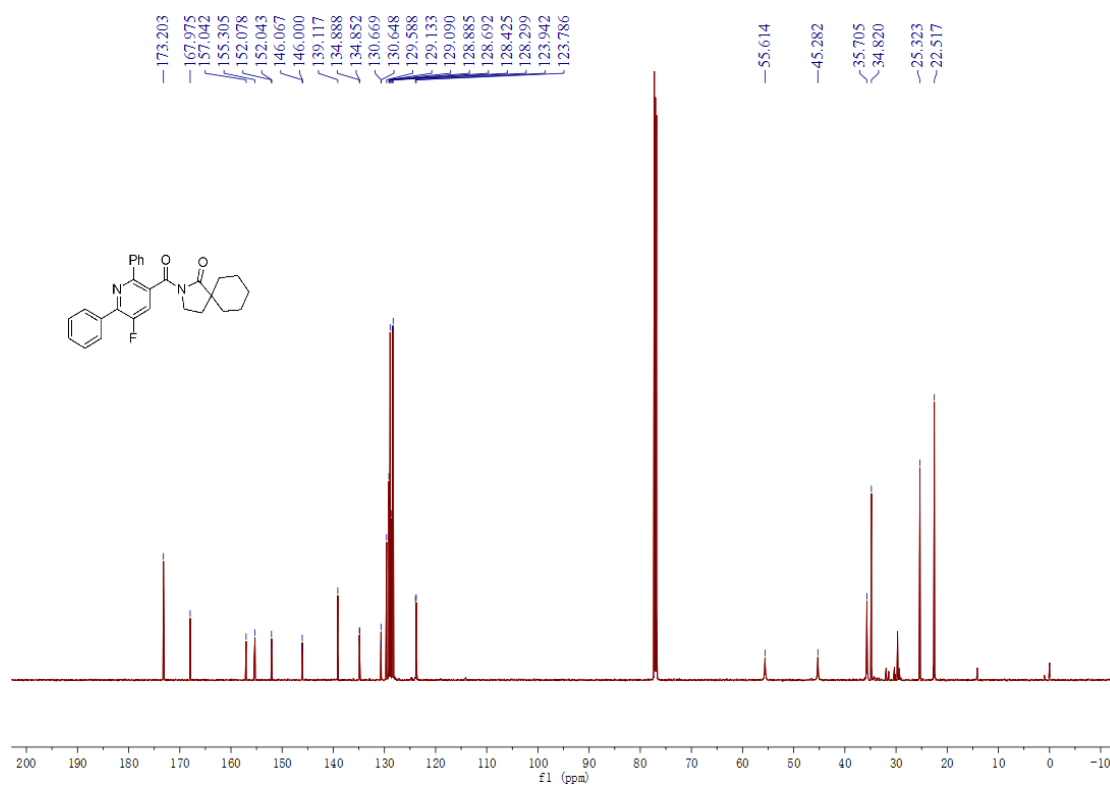

[ $^{19}\text{F}$ \_NMR\_565 MHz]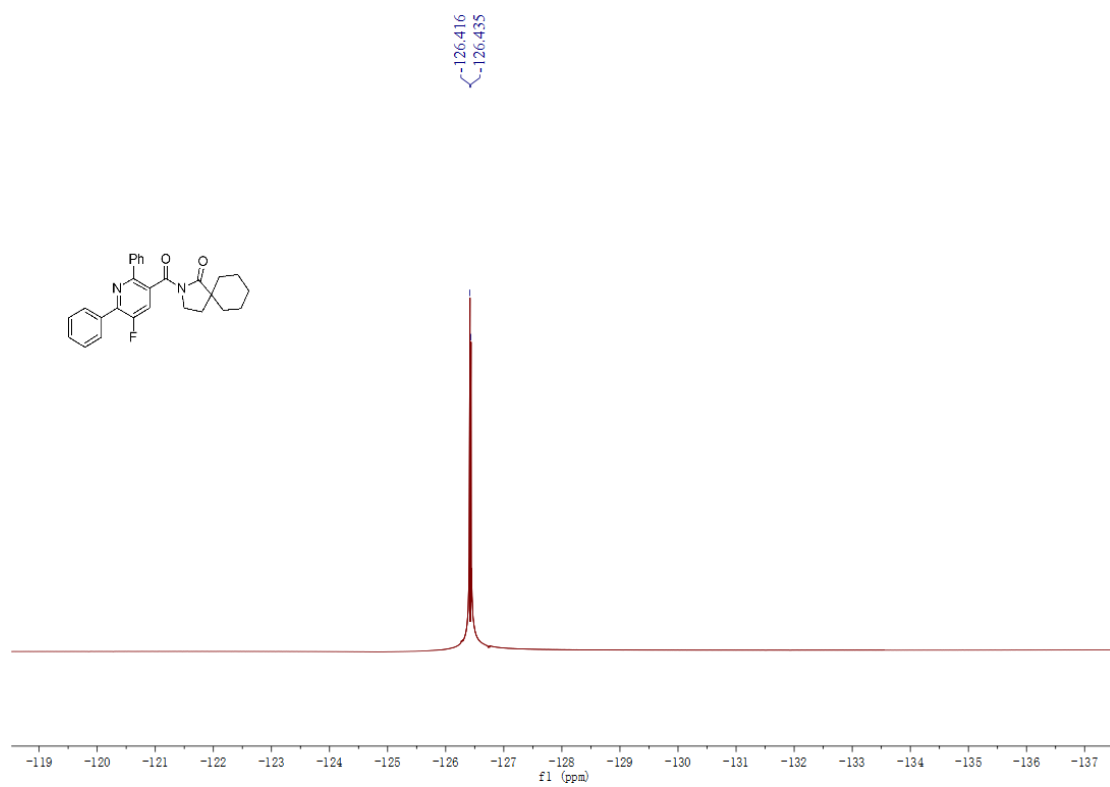

**1-(6-(4-Bromophenyl)-5-fluoro-2-phenylnicotinoyl)-3-methylimidazolidin-2-one (3r)**[<sup>1</sup>H\_NMR\_600 MHz\_(CDCl<sub>3</sub>: 7.26 ppm)]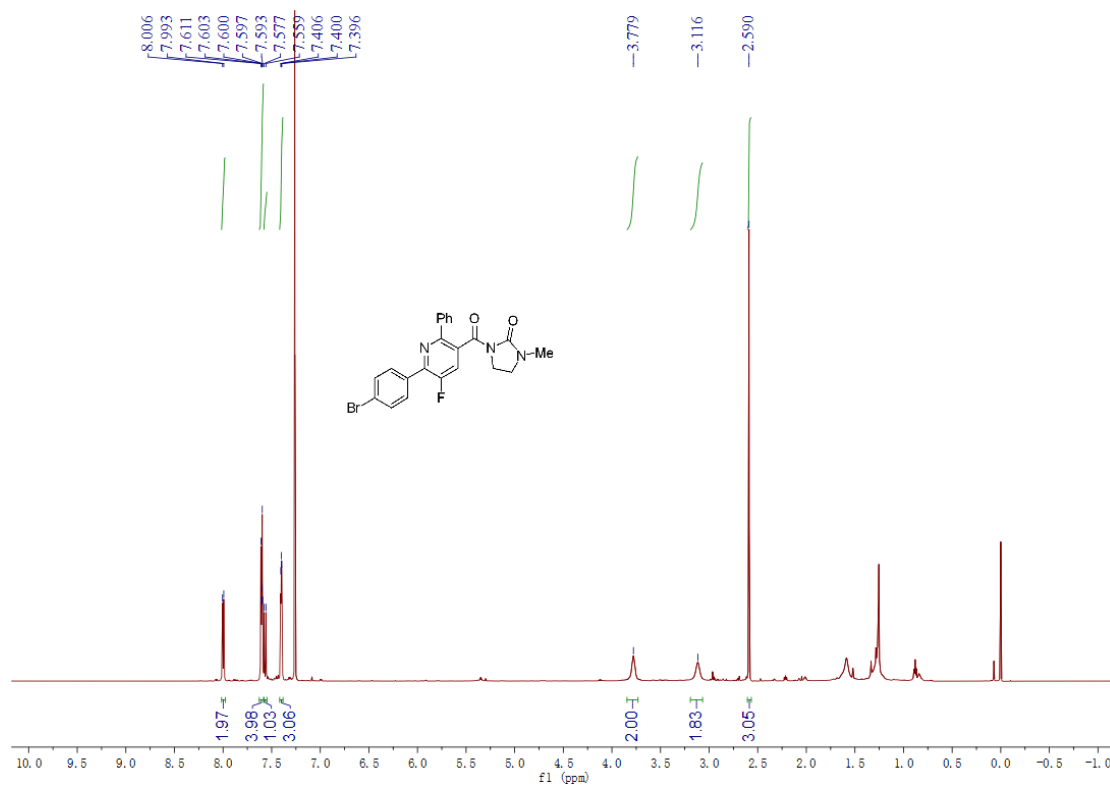[<sup>13</sup>C\_NMR\_150 MHz\_(CDCl<sub>3</sub>: 77.00 ppm)]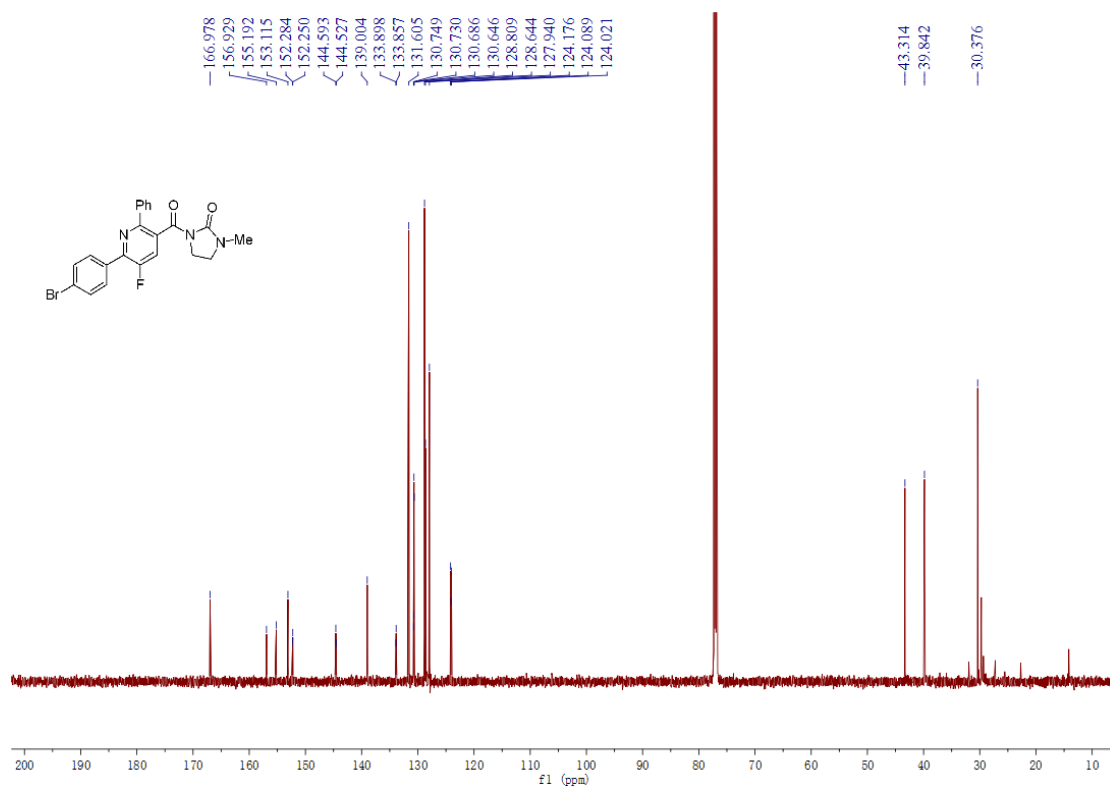

[ $^{19}\text{F}$ \_NMR\_565 MHz]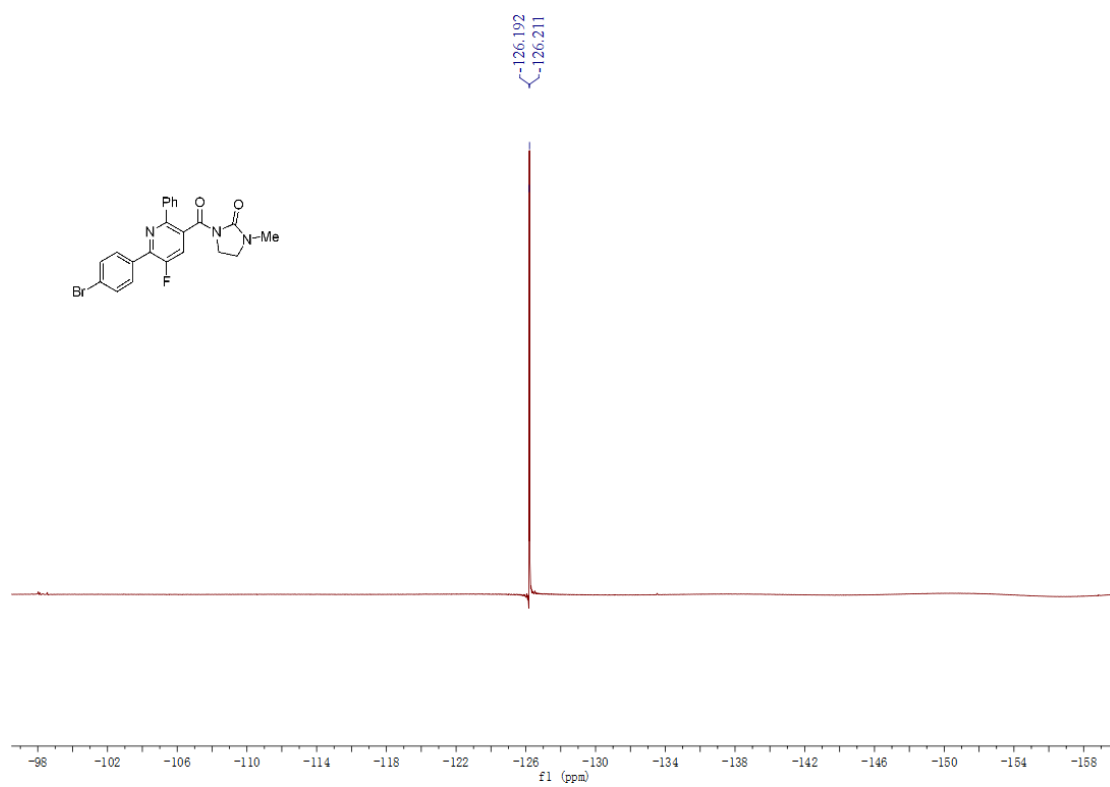

**1-(5-Fluoro-2,6-diphenylnicotinoyl)-3-phenylimidazolidin-2-one (3s)** $^1\text{H-NMR}$ \_400 MHz\_( $\text{CDCl}_3$ : 7.26 ppm)]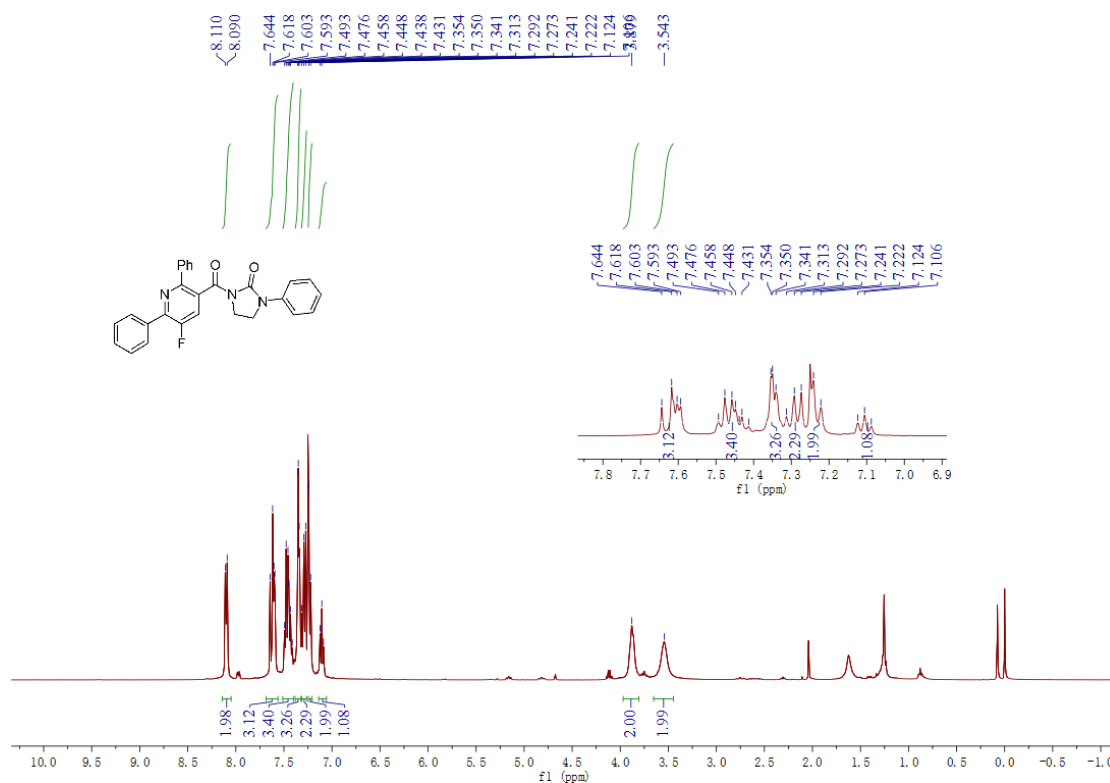 $^{13}\text{C-NMR}$ \_100 MHz\_( $\text{CDCl}_3$ : 77.00 ppm)]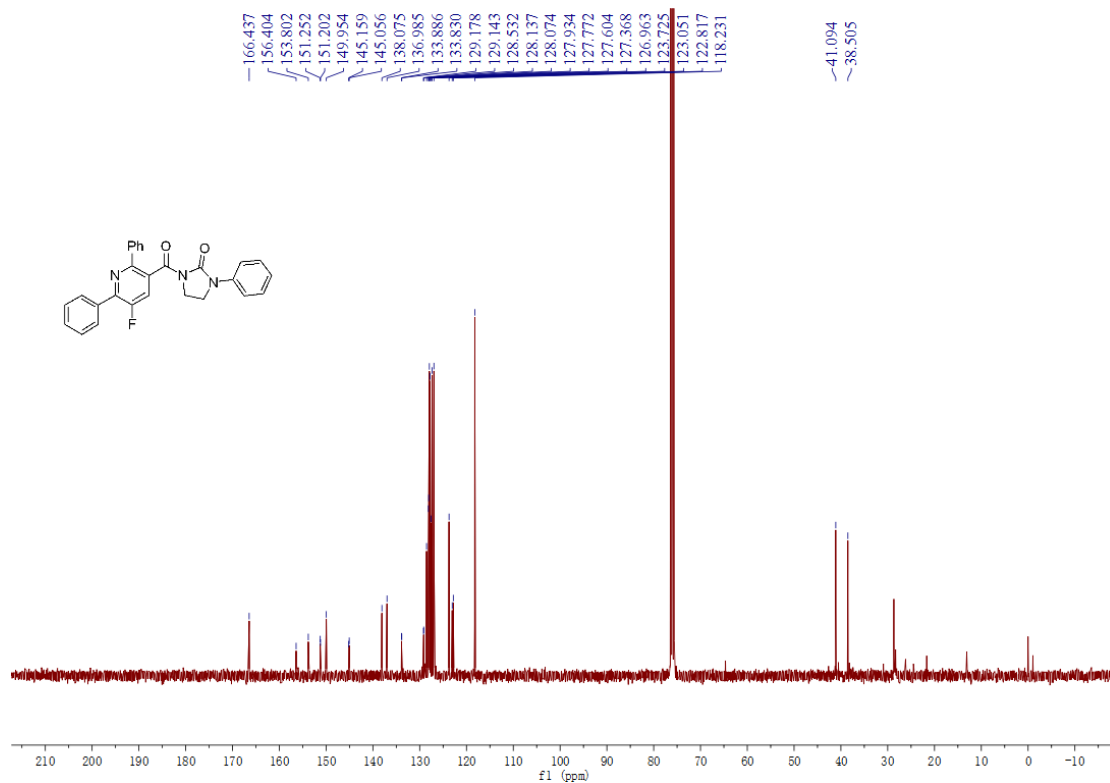

[ $^{19}\text{F}$ \_NMR\_375 MHz]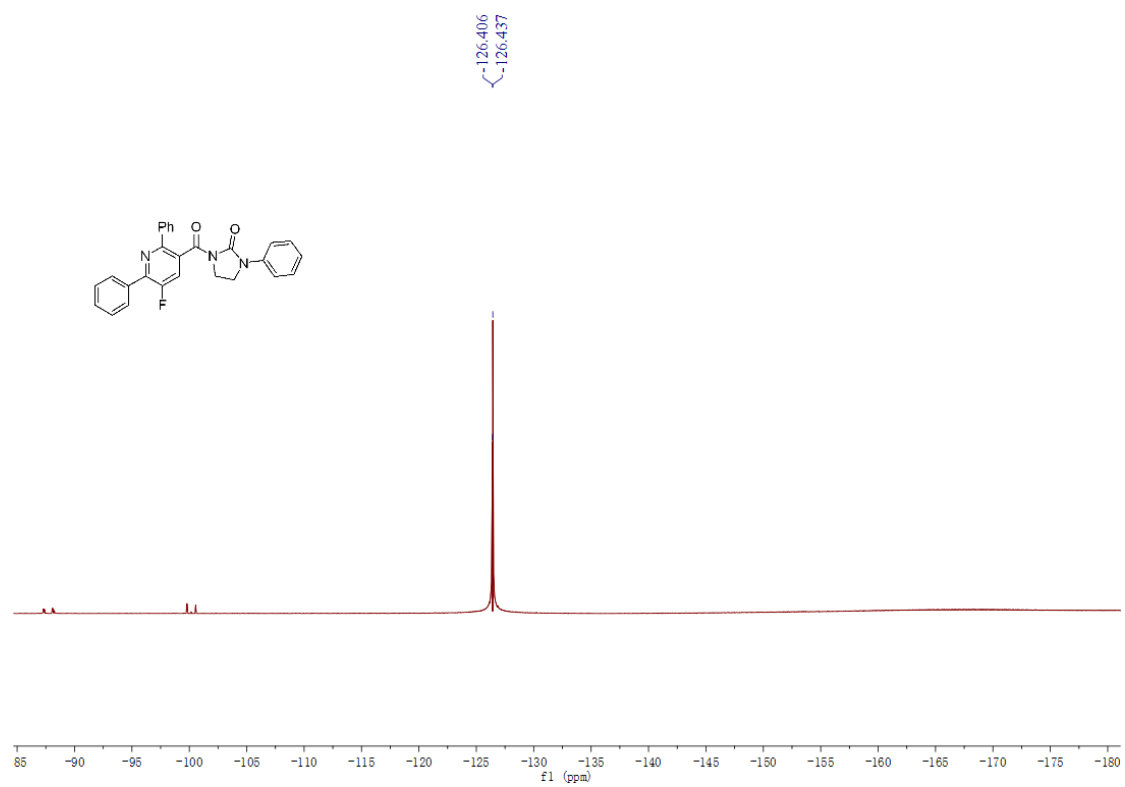

**1-(5-Fluoro-2,6-diphenylnicotinoyl)-3-(naphthalen-2-yl)imidazolidin-2-one (3t)** $^1\text{H-NMR}$ \_400 MHz\_( $\text{CDCl}_3$ : 7.26 ppm)]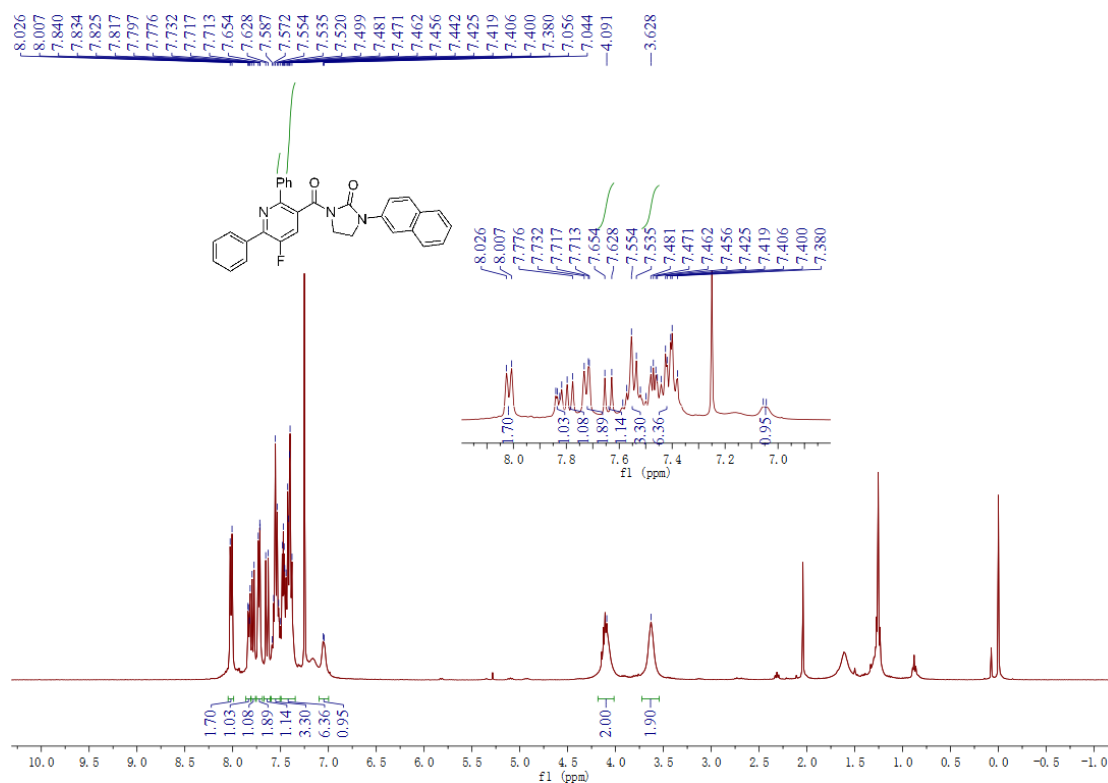 $^{13}\text{C-NMR}$ \_100 MHz\_( $\text{CDCl}_3$ : 77.00 ppm)]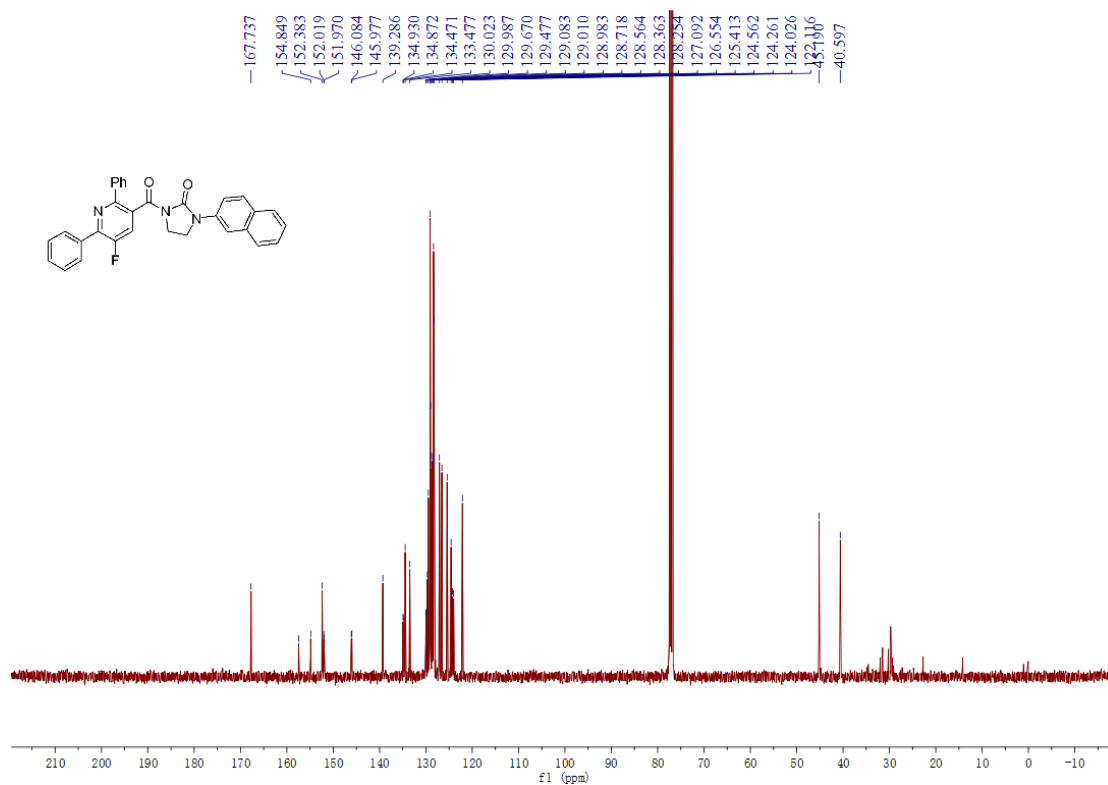



[ $^{19}\text{F}$ \_NMR\_375 MHz]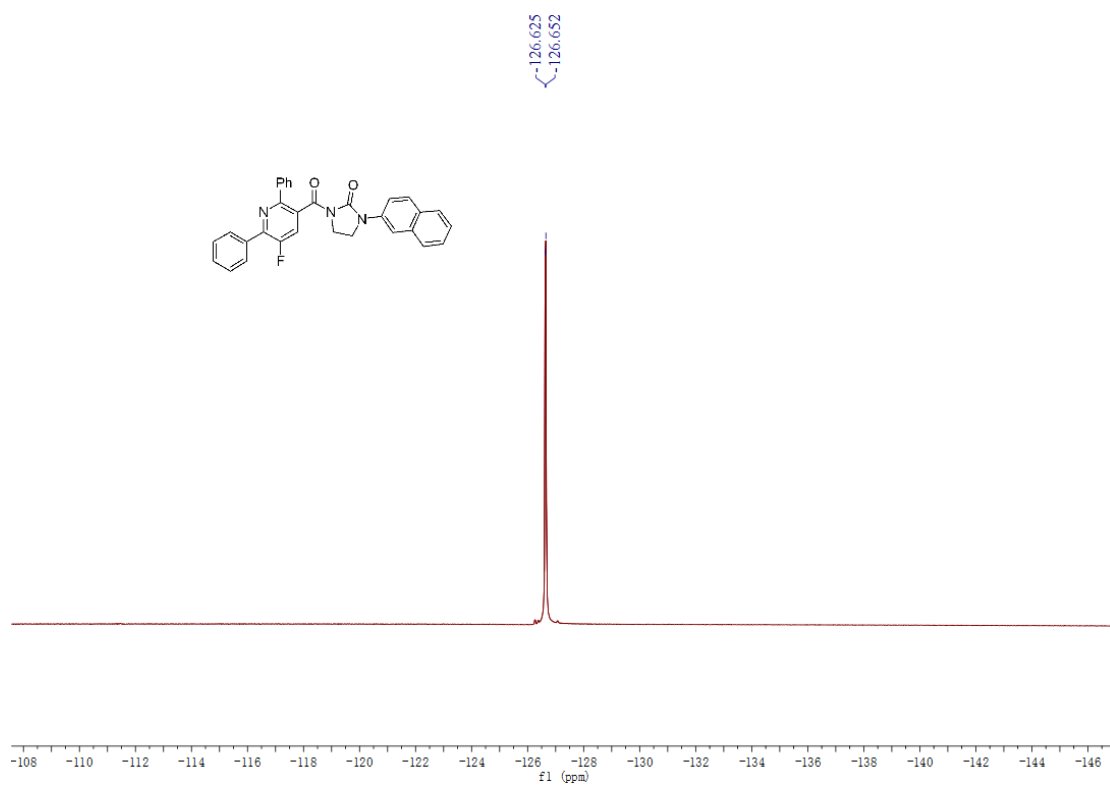

**1-(5-Fluoro-2,6-diphenylnicotinoyl)-3-(p-tolyl)imidazolidin-2-one (3u)**[<sup>1</sup>H\_NMR\_400 MHz\_(CDCl<sub>3</sub>: 7.26 ppm)]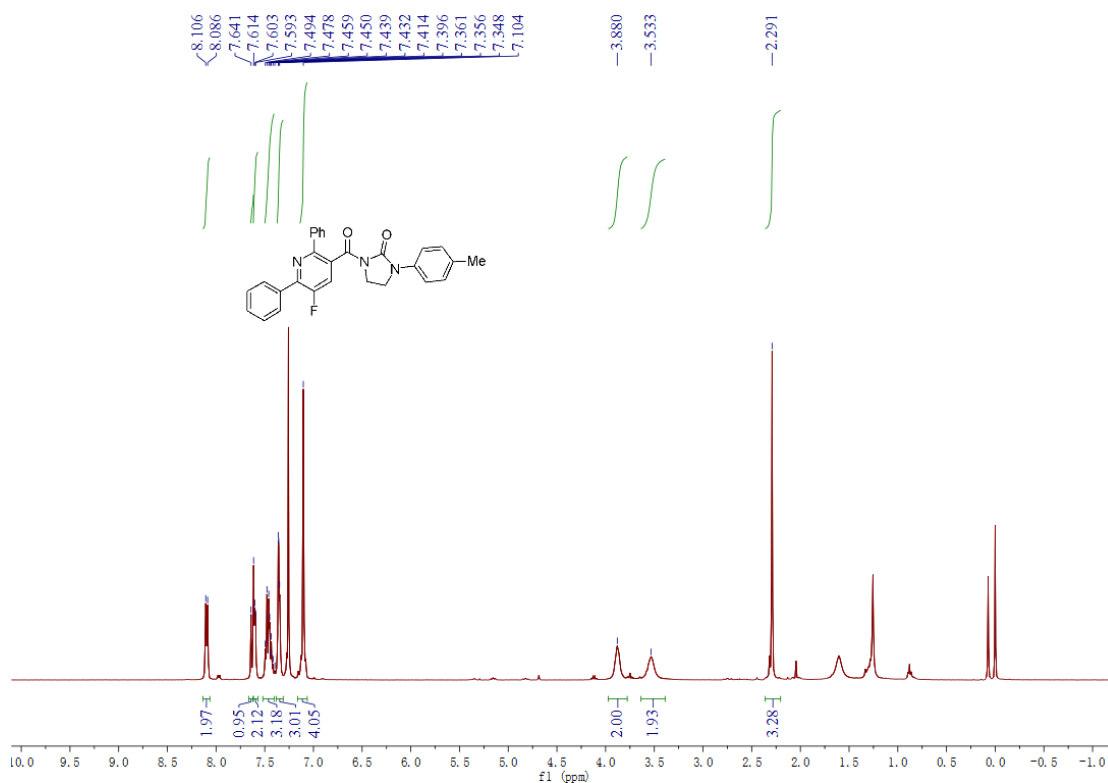[<sup>13</sup>C\_NMR\_100 MHz\_(CDCl<sub>3</sub>: 77.00 ppm)]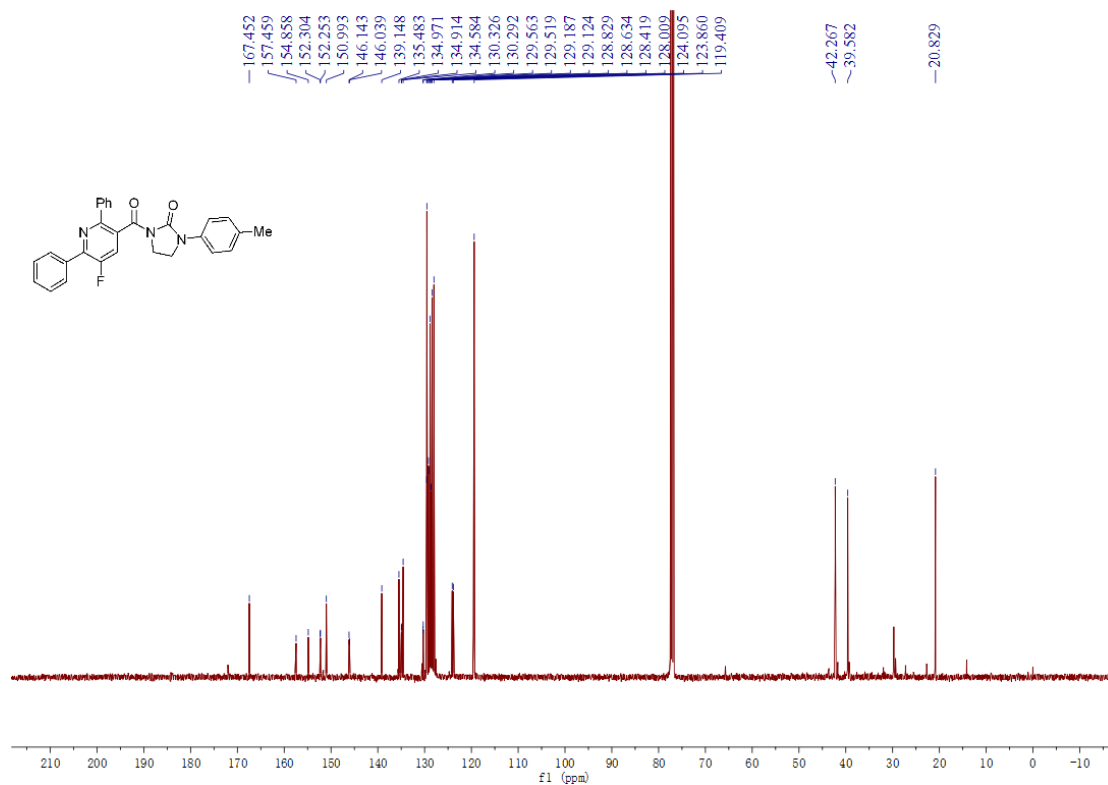

$[^{19}\text{F\_NMR\_375 MHz}]$ 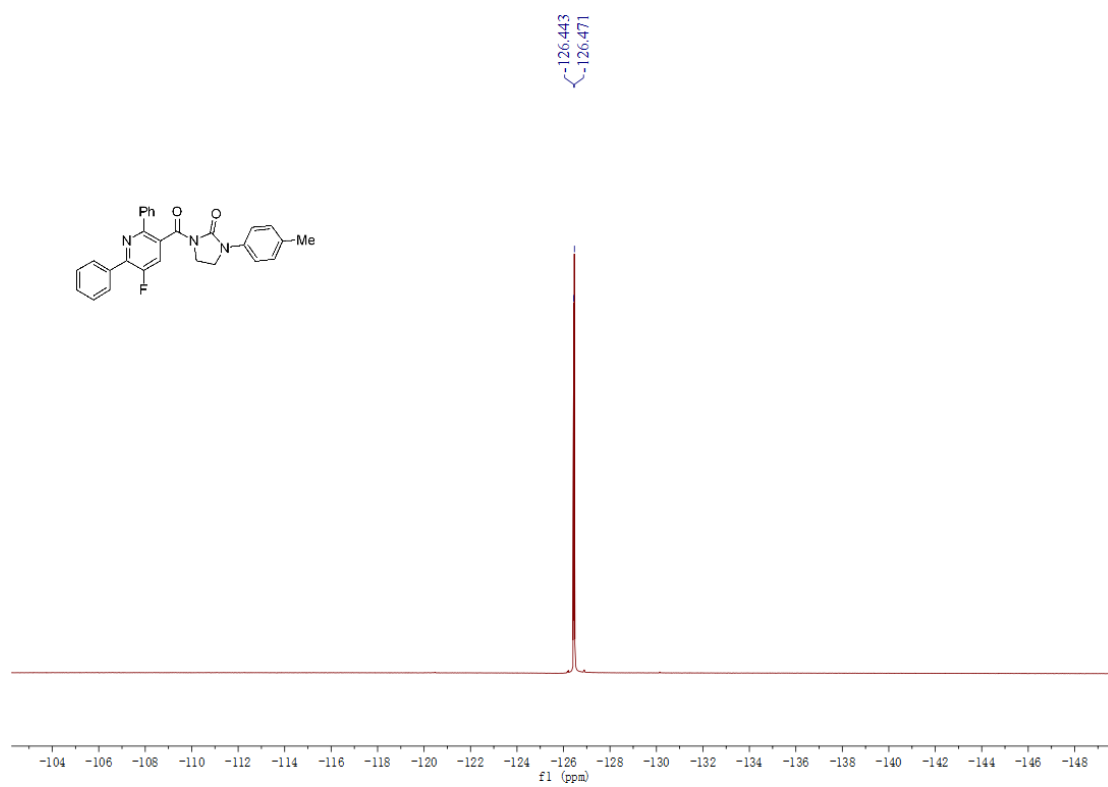

**1-(4-(Tert-butyl)phenyl)-3-(5-fluoro-2,6-diphenylnicotinoyl)imidazolidin-2-one**  
**(3v)** $[^1\text{H\_NMR\_400 MHz\_}(\text{CDCl}_3: 7.26 \text{ ppm})]$ 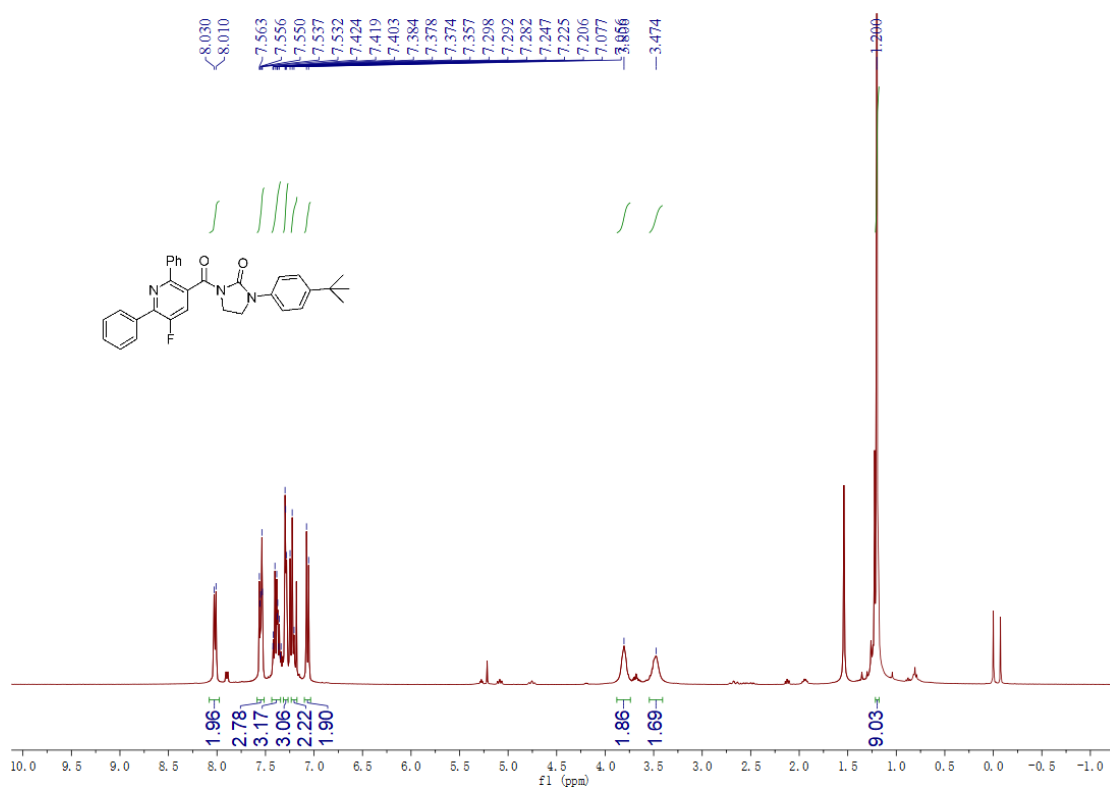 $[^{13}\text{C\_NMR\_100 MHz\_}(\text{CDCl}_3: 77.00 \text{ ppm})]$ 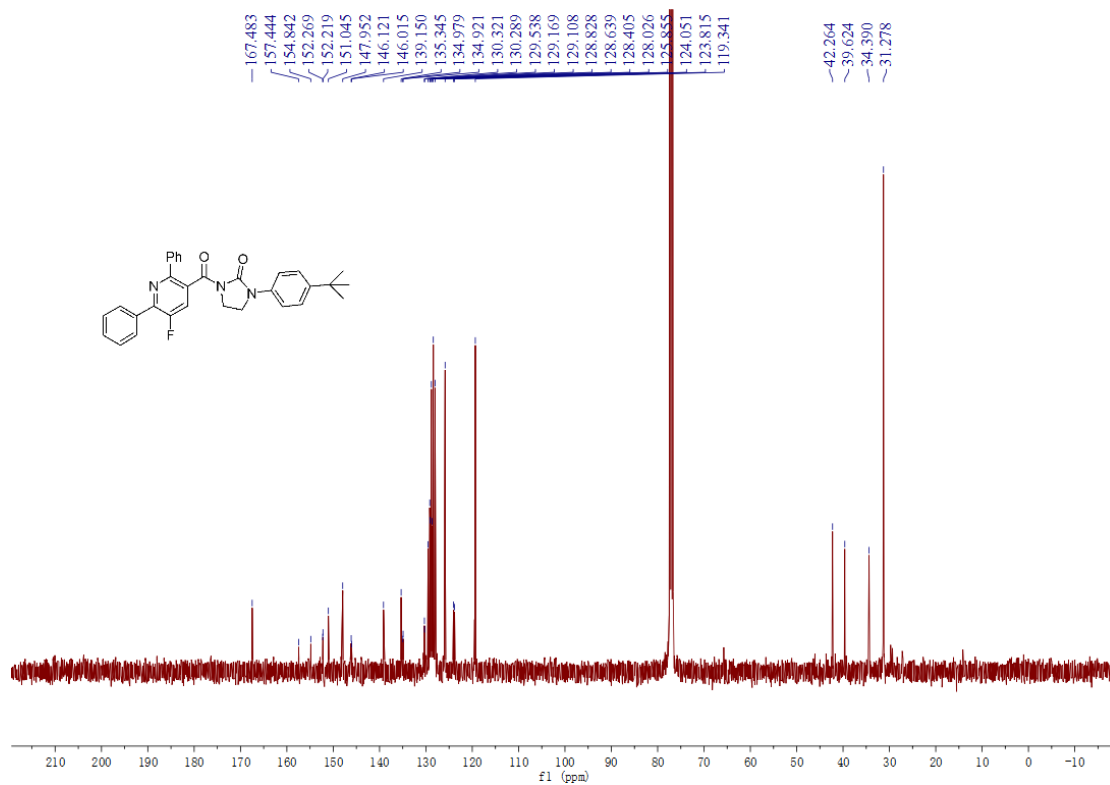

[<sup>19</sup>F\_NMR\_375 MHz]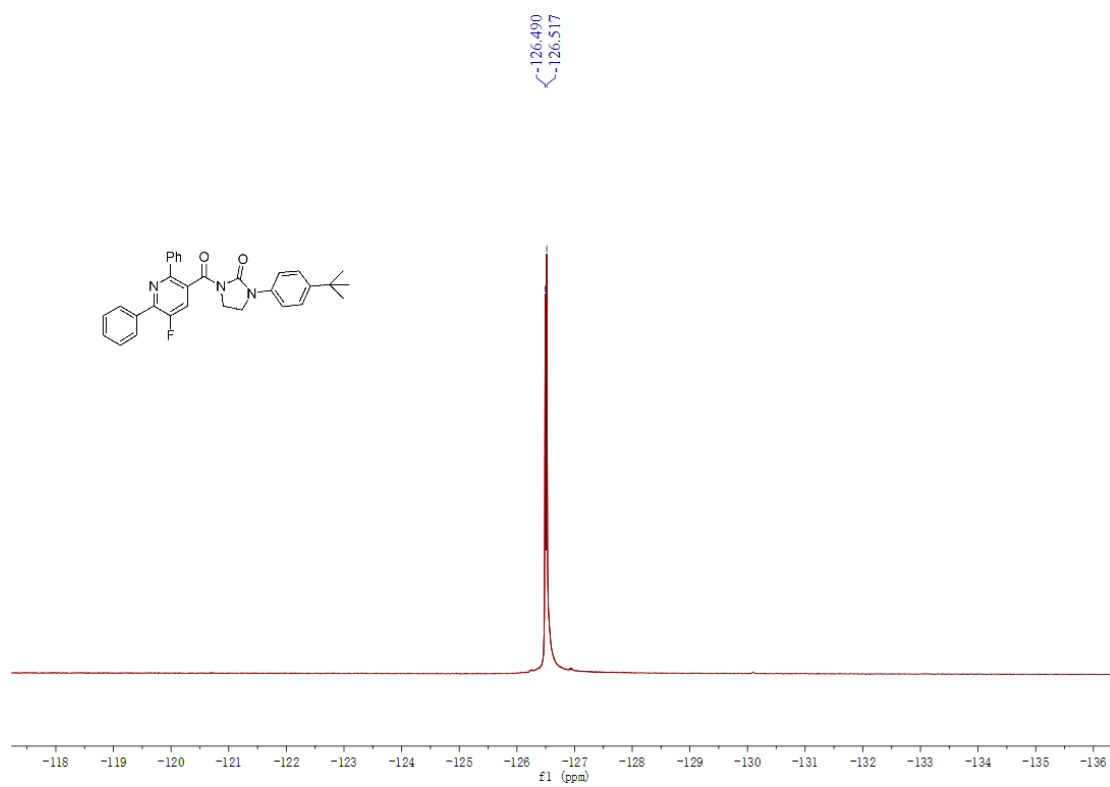

**1-(3-Chlorophenyl)-3-(5-fluoro-2,6-diphenylnicotinoyl)imidazolidin-2-one (3w)**[<sup>1</sup>H\_NMR\_400 MHz\_(CDCl<sub>3</sub>: 7.26 ppm)]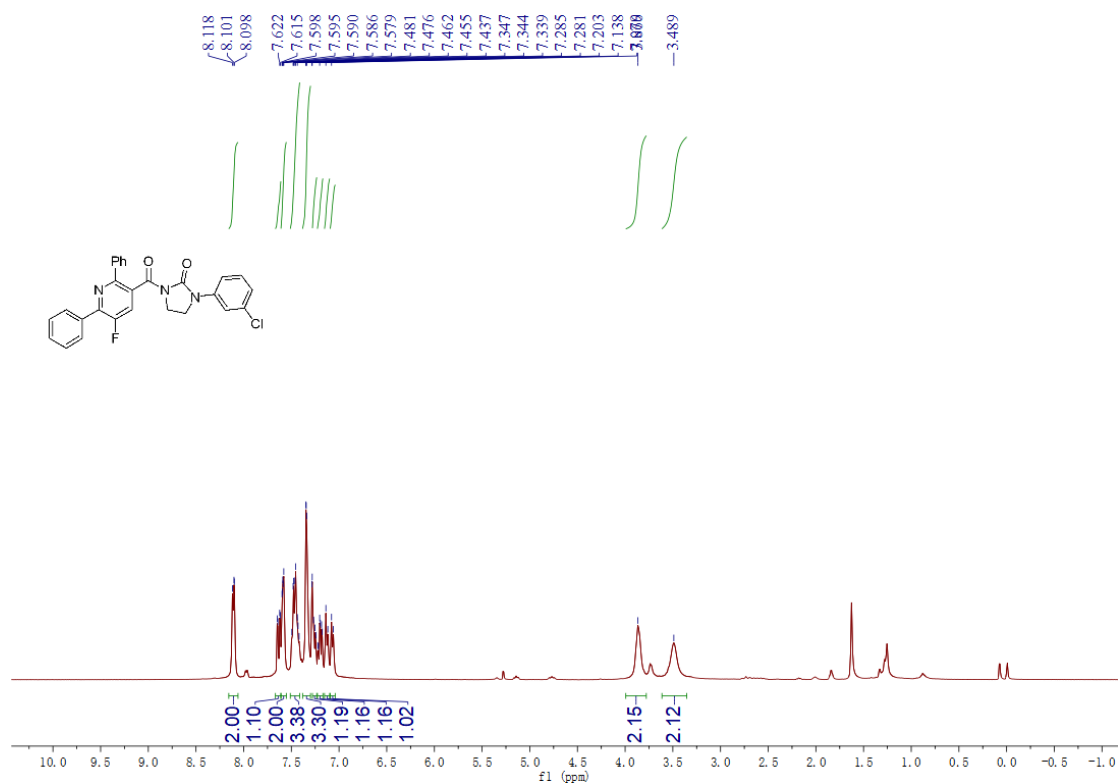[<sup>13</sup>C\_NMR\_100 MHz\_(CDCl<sub>3</sub>: 77.00 ppm)]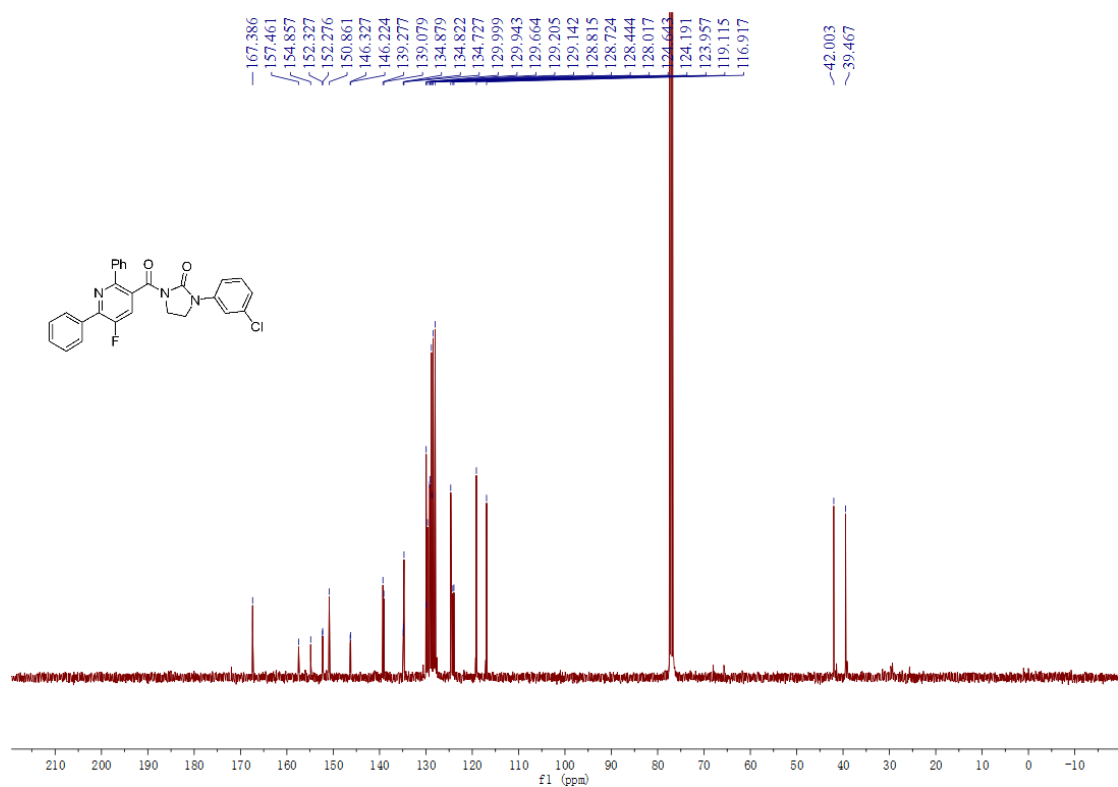

[<sup>19</sup>F\_NMR\_375 MHz]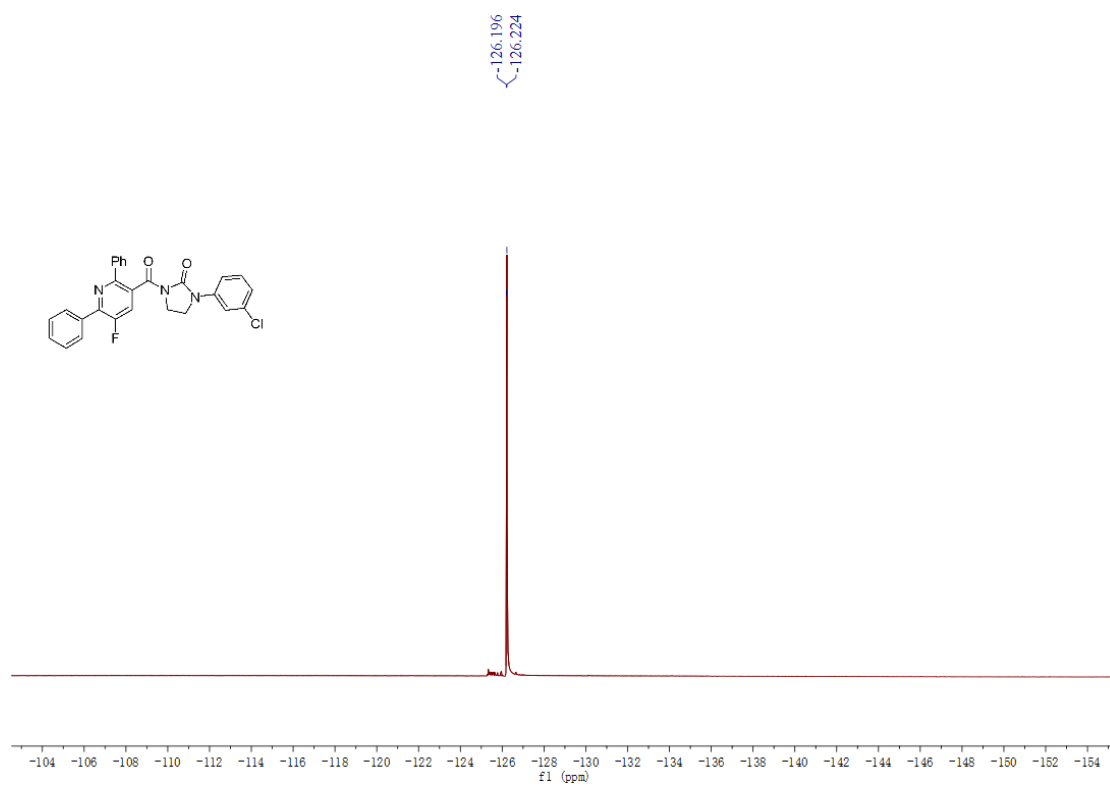

**1-(5-Fluoro-2,6-diphenylnicotinoyl)-3-(3-methoxyphenyl)imidazolidin-2-one (3x)**[ $^1\text{H-NMR}$ \_400 MHz\_( $\text{CDCl}_3$ : 7.26 ppm)]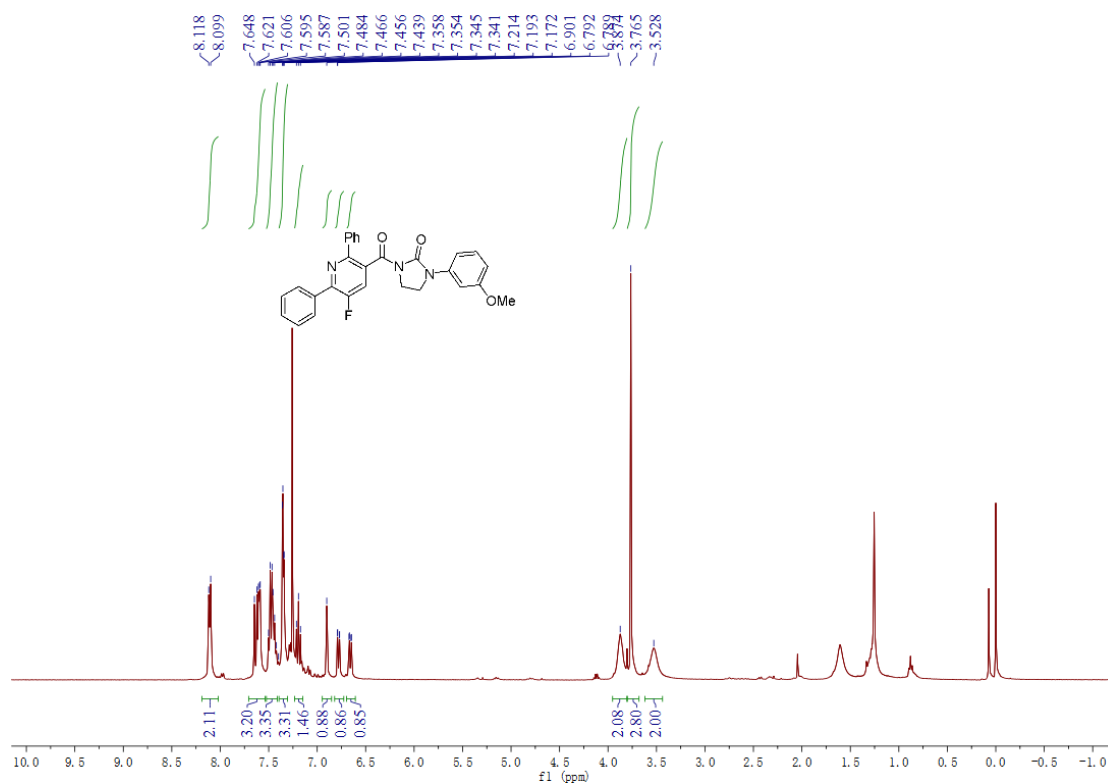[ $^{13}\text{C-NMR}$ \_100 MHz\_( $\text{CDCl}_3$ : 77.00 ppm)]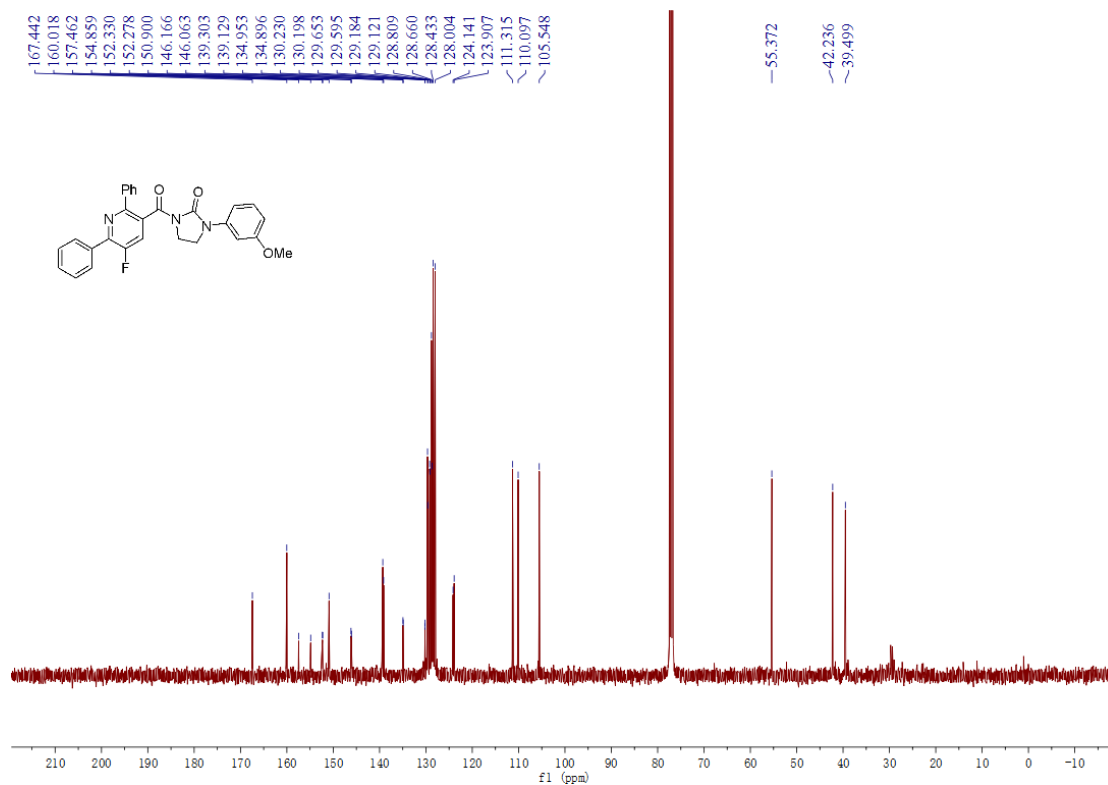



[ $^{19}\text{F}$ \_NMR\_375 MHz]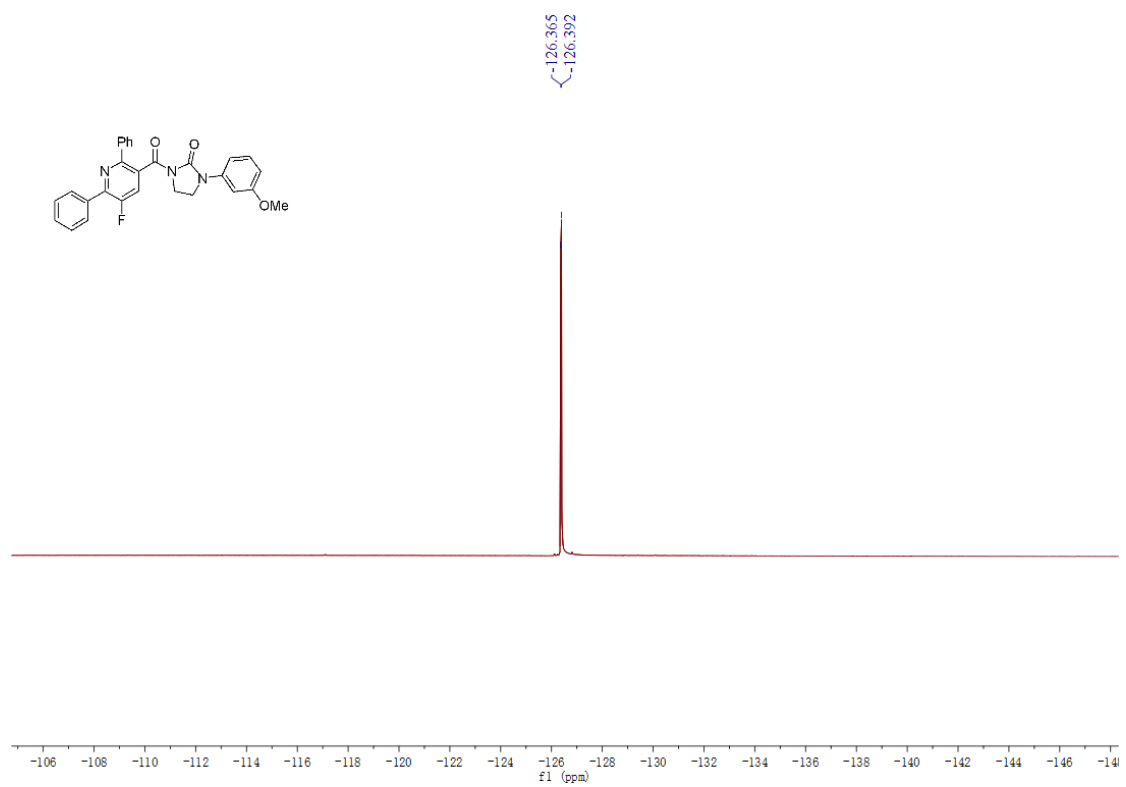

**5-Fluoro-2,6-diphenylnicotinic acid (4a)**[<sup>1</sup>H\_NMR\_600 MHz\_(CDCl<sub>3</sub>: 7.26 ppm)]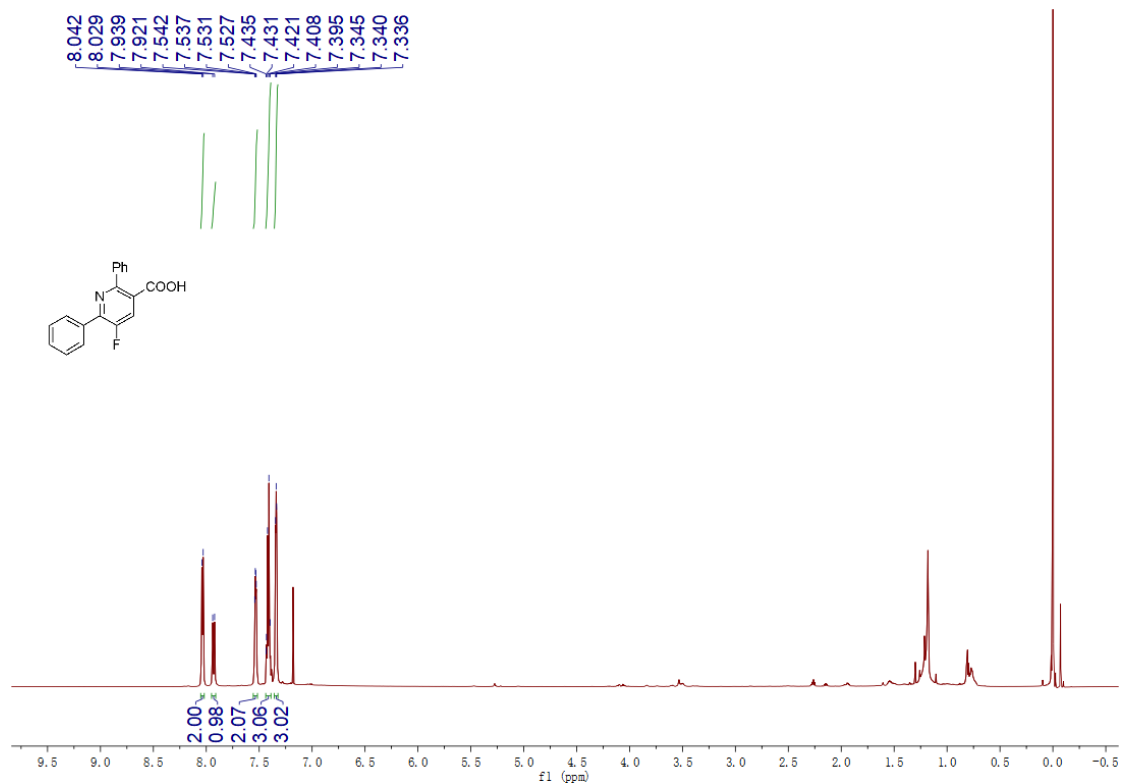[<sup>13</sup>C\_NMR\_150 MHz\_(CDCl<sub>3</sub>: 77.00 ppm)]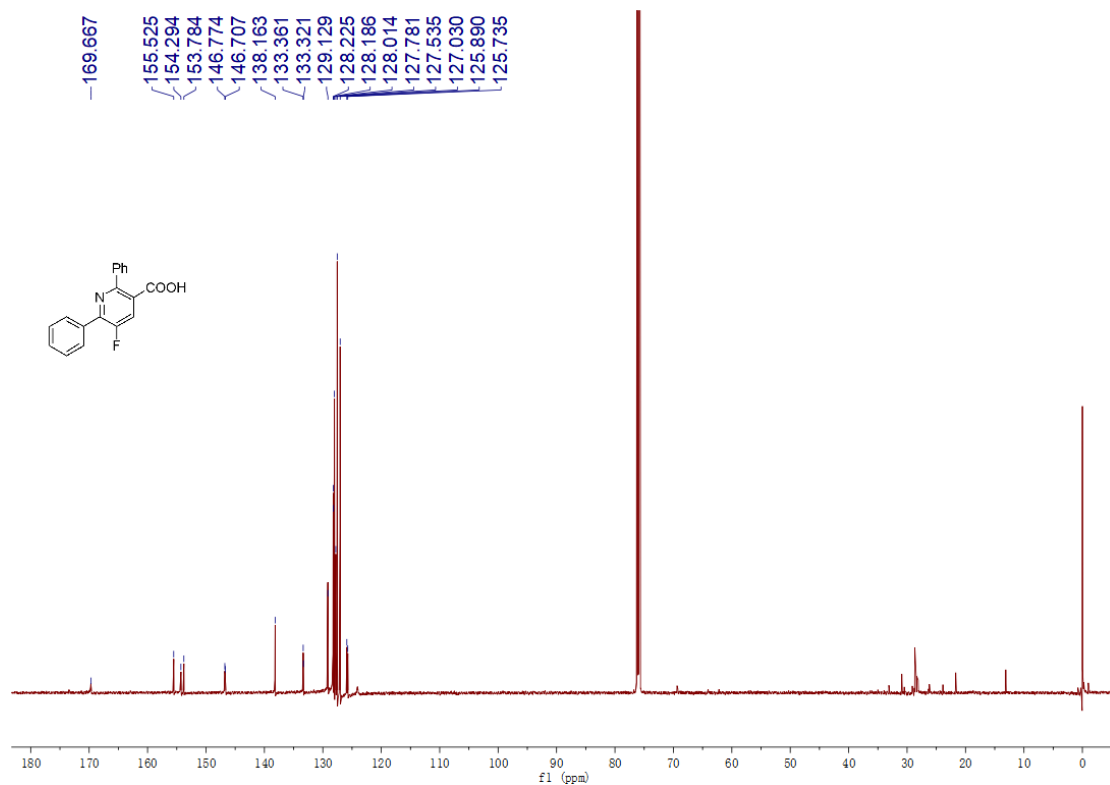

[<sup>19</sup>F\_NMR\_565 MHz]

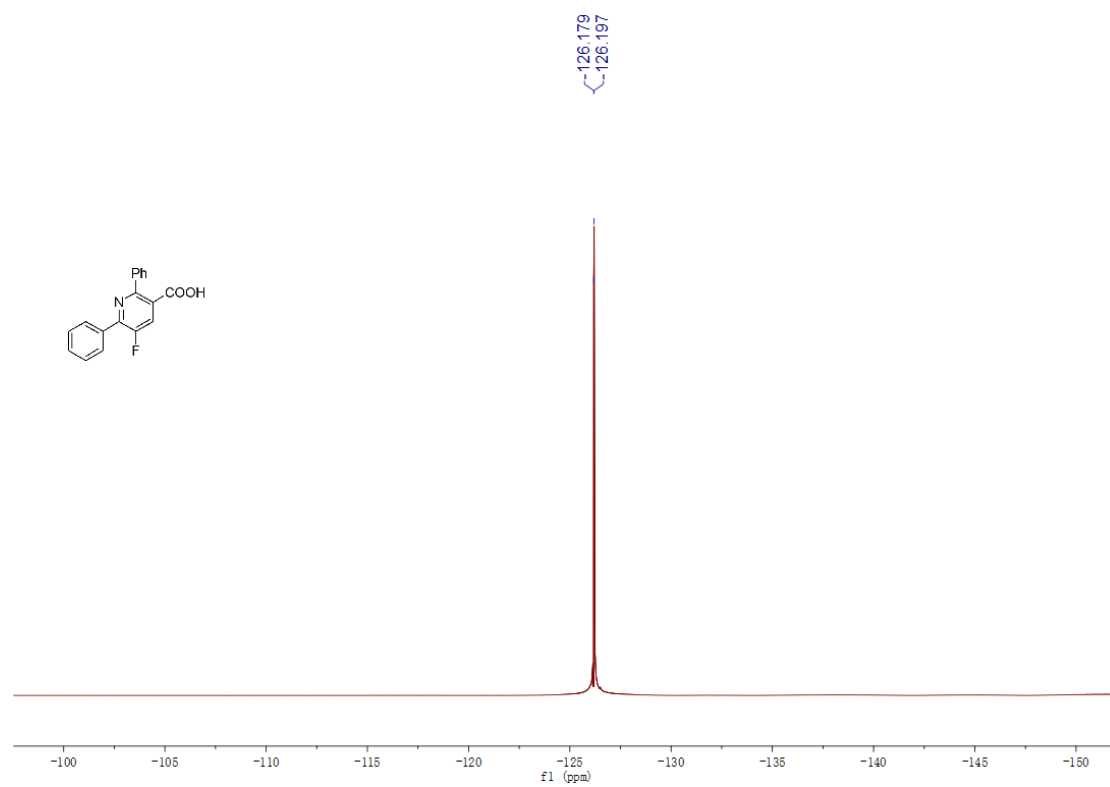

Supplement: d2ob00133k1.pdf [file d2ob00133k1.pdf]
